# Supplementary material
Source: PubMed Central journal article supplement (PMC5859942)

**Inhibition of human CYP3A4 by rationally designed ritonavir-like compounds:  
Impact and interplay of the side group functionalities**

Eric R. Samuels and Irina F. Sevrioukova

**SUPPORTING INFORMATION**

**Synthesis of CYP3A4 inhibitors, mass spectrometry and NMR data**

$^1\text{H}$  NMR spectra were recorded on Bruker DRX 400 MHz or DRX 500 MHz spectrometer. Chemical shifts ( $\delta$ ) are reported in ppm and J-values in hertz for the compound's solution in  $\text{D}_2\text{O}$  or deuterated chloroform ( $\text{CDCl}_3$ ) with tetramethylsilane (TMS) as internal reference. All NMR data were processed using TopSpin 3.5 software. High resolution mass spectrometry data (HRMS) were obtained via ESI LC-TOF on a Waters (Micromass) LCT Premier spectrometer (Waters), with PEG as the calibrant. Thin layer chromatography (TLC) was performed using EMD Millipore silica gel 60  $\text{F}_{254}$  aluminum plates. Separation by column chromatography was performed using Fisher silica gel 60 (230-400 mesh). Where applicable, optical rotation was measured with a JASCO P-1010 polarimeter. All reactions were conducted with commercially available reagents (Aldrich, Thermo-Fisher, Alfa Aesar, Acros, Oakwood, Millipore). Anhydrous solvents were acquired through a solvent purification system (Inert PureSolv and JC Meyer systems) or purified according to standard procedures.

**Synthesis of Analogs**

*General Procedure for Synthesis of Compounds **1a**, **b***

Reference: Park, J. D., and Kim, D. H. (2002) *J Med Chem* **45**, 911-918

L-cysteine (10.0g, 82.5 mmol) was dissolved in methanol (MeOH; 150 ml). Sodium cyanoborohydride (5.18g, 82.5 mmol, 1 eq) was slowly added, followed by acetone (47.9g, 825 mmol, 10 eq), and the solution was stirred at room temperature overnight. On completion, the white precipitate was filtered, washed with MeOH, and dried to afford the pure product **1a** as a white powder (3.5g, 27%).  $^1\text{H}$  NMR (400 MHz,  $\text{D}_2\text{O}$ )  $\delta$  3.98 (t,  $J$  = 4.5 Hz, 1H), 3.52 (quint,  $J$  = 6.6 Hz, 1H), 3.15 (dd,  $J$  = 4.8, 14.7 Hz, 1H) 3.04 (dd,  $J$  = 4.5, 14.8 Hz, 1H), 1.37 (d,  $J$  = 6.5 Hz, 6H). HRMS  $m/z$  calculated for  $\text{C}_6\text{H}_{13}\text{NO}_2\text{S}$  [ $\text{M} + \text{Na}$ ] $^+$ : 186.0565. Found: 186.0569. The pure product **1b** was obtained as a white powder (3.55g, 22.5%).  $^1\text{H}$  NMR (400 MHz,  $\text{D}_2\text{O}$ )  $\delta$  3.89 (t,  $J$  = 4.4 Hz, 1H), 3.63 (quint,  $J$  = 7.2 Hz, 1H), 3.12 (dd,  $J$  = 4.1, 14.9 Hz, 1H) 3.01 (dd,  $J$  = 4.6, 15.1 Hz, 1H), 2.08 (bs, 2H), 1.75-1.63 (bd, 6H). HRMS  $m/z$  calculated for  $\text{C}_8\text{H}_{15}\text{NO}_2\text{S}$  [ $\text{M} + \text{H}$ ] $^+$ : 190.0902. Found: 190.0899.

### Scheme 1: Synthesis of Cysteine Derivatives

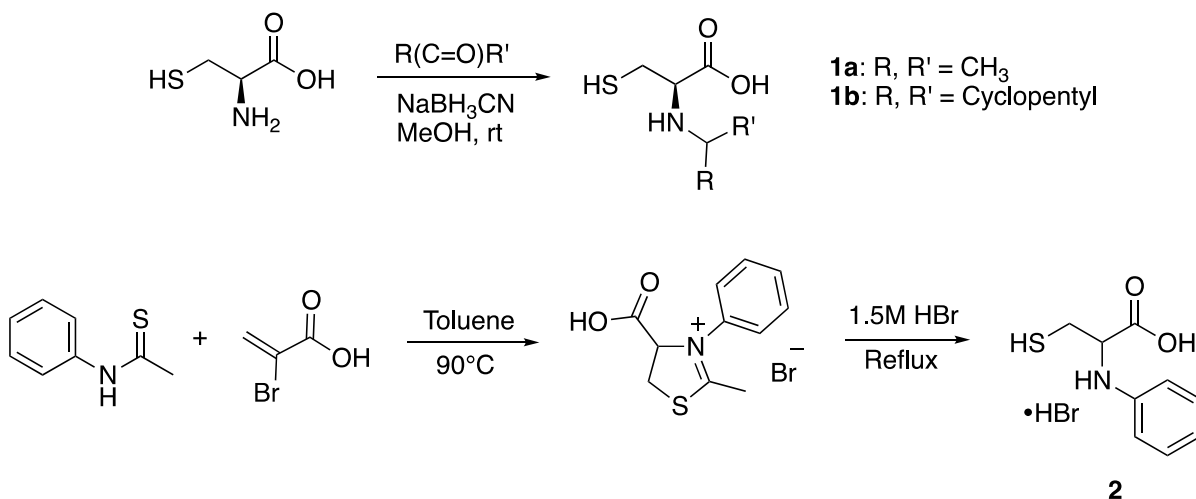

### Synthesis of Compound 2

#### References:

Park, J. D., and Kim, D. H. (2002) *J Med Chem* **45**, 911-918

Lee, G. H., Park, C. S., and Lee, H. W. (1988) *Bull. Korean Chem. Soc.* **9**, 25-27

2-Bromoacrylic acid (1.1g, 7.3 mmol, 1.1 eq) was added to a solution of thioacetanilide (1.0g, 6.6 mmol) in dry toluene (20 ml). The mixture was stirred at 90°C for 1 h and then cooled to room temperature. The formed precipitate was filtered, washed with acetone, and recrystallized from MeOH:ethyl acetate (EtOAc):hexane (1:1:2) to afford the thiazolinium bromide intermediate. The intermediate was refluxed with 1.5 M HBr (30 ml) for 3 hours and then cooled to room temperature. The residue was concentrated under reduced pressure, dissolved in 48% HBr, and evaporated to obtain a crude, viscous material, which was recrystallized from 1-propanol:benzene (1:8) to obtain the racemic pure product (hydrobromide salt) **2** as a light tan solid (1.1g, 84.5%) <sup>1</sup>H NMR (400 MHz, D<sub>2</sub>O) δ 7.54-7.26 (m, 5H), 4.43 (q, *J* = 4.5 Hz, 1H), 3.14 (dd, *J* = 3.6, 14.8 Hz, 1H) 2.90 (dd, *J* = 4.8, 14.8 Hz, 1H). HRMS *m/z* calculated for C<sub>9</sub>H<sub>11</sub>NO<sub>2</sub>S [M + Na]<sup>+</sup>: 220.0408. Found: 220.0405. Optical rotation (in MeOH): 0.053±0.003.

### Synthesis of Compound 3

*N*-*tert*-butyloxycarbonyl (*Boc*)-ethanolamine (2.0g, 12.4 mmol) was added to dry dichloromethane (DCM; 25 ml). To this solution, *p*-toluenesulfonyl chloride (3.55g, 18.6 mmol, 1.5 eq) and triethylamine (3.76g, 37.2 mmol, 3 eq) were slowly added at 0°C. The reaction was allowed to slowly come to room temperature overnight. When the reaction was completed,

DCM was evaporated and the crude mixture was purified using column chromatography (1:1 hexane:EtOAc), affording the pure product **3** as a viscous, opaque oil (3.46g, 88%) TLC: hexane/EtOAc 1:1 (Rf. 0.5).  $^1\text{H NMR}$  (400 MHz,  $\text{CDCl}_3$ )  $\delta$  7.84 (d,  $J = 8.4$  Hz, 2H), 7.41 (d,  $J = 8.0$  Hz, 2H), 4.83 (bs, 1H (NH)), 4.12 (t,  $J = 5.0$  Hz, 2H), 3.43 (q,  $J = 5.1$  Hz, 2H), 2.46 (s, 3H), 1.41 (s, 9H). HRMS  $m/z$  calculated for  $\text{C}_{14}\text{H}_{21}\text{NO}_5\text{S}$  [ $\text{M} + \text{Na}$ ] $^+$ : 338.1038. Found: 338.1031.

#### General Procedure for Synthesis of Compounds **4a-c**

To a DMF solution of compound **3** (0.5g, 1.6 mmol; 7 ml), compound **1a** (0.32g, 1.9 mmol, 1.23 eq) was added. To this mixture, 1 N NaOH (2 ml) was added, and the reaction was allowed to stir at  $50^\circ\text{C}$  overnight, where a white precipitate was formed. The precipitate was filtered, washed with ether, and dried, affording **4a** as a white crystalline powder (0.30g, 61%). HRMS  $m/z$  calculated for  $\text{C}_{13}\text{H}_{26}\text{N}_2\text{O}_4\text{S}$  [ $\text{M} + \text{Na}$ ] $^+$ : 329.1511. Found: 329.1508. The product **4b** was obtained as a white powder (0.22g, 41%). HRMS  $m/z$  calculated for  $\text{C}_{15}\text{H}_{28}\text{N}_2\text{O}_4\text{S}$  [ $\text{M} + \text{Na}$ ] $^+$ : 355.1667. Found: 355.1670. For **4c**, no precipitate formed. Therefore, the crude product was obtained by evaporating the solvent and was used in the next step without any further purification. HRMS  $m/z$  calculated for  $\text{C}_{16}\text{H}_{24}\text{N}_2\text{O}_4\text{S}$  [ $\text{M} + \text{Na}$ ] $^+$ : 363.1354. Found: 363.1360

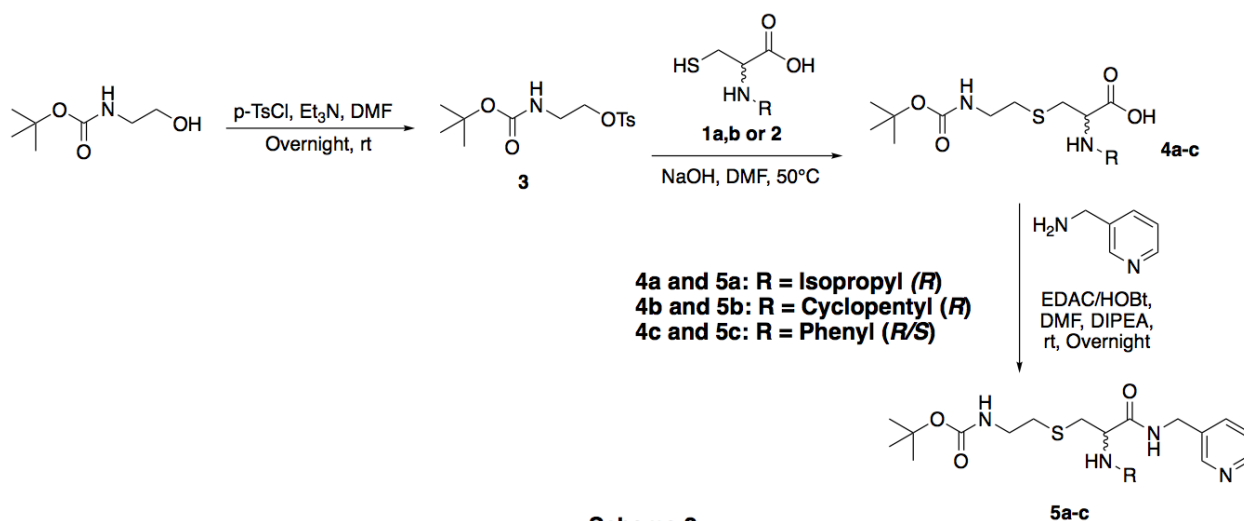

#### General Procedure for Synthesis of Compounds **5a-c**

Compound **4a** (0.2g, 0.65 mmol) was dissolved in DMF (5 ml). To this solution, 1-ethyl-3-(3-Dimethylaminopropyl)carbodiimide (EDAC; 0.19g, 0.98 mmol, 1.5 eq) and hydroxybenzotriazole (HOBt; 0.15g, 0.98 mmol, 1.5 eq) were added, followed by the addition of 3-(aminomethyl)pyridine (0.11g, 0.98 mmol, 1.5 eq) and *N,N*-diisopropylethylamine (DIPEA; 0.25g, 1.95 mmol, 3 eq). The reaction was stirred at room temperature overnight. Upon completion, the solvent was evaporated and the reaction mixture was diluted with ethyl

acetate. The organic layer was then washed with saturated  $\text{NaHCO}_3$ , water, and brine. The combined organic layers were dried over  $\text{MgSO}_4$  and concentrated *in vacuo* to give the crude product, which was purified via column chromatography (95:5 EtOAc:MeOH). The pure product **5a** was obtained as an opaque oil (0.091g, 35%). TLC: EtOAc/MeOH 90:10 (Rf. 0.32).  $^1\text{H}$  NMR (400 MHz,  $\text{CDCl}_3$ )  $\delta$  8.55 (m, 2H), 8.01 (t,  $J = 5.7$  Hz, 1H), 7.63 (d,  $J = 7.7$  Hz, 1H), 4.92 (bs, 1H (NH)), 4.48 (d,  $J = 6.0$  Hz, 2H), 3.33-3.30 (m, 3H), 3.04 (dd,  $J = 3.9, 13.4$  Hz, 1H), 2.77 (m, 2H), 2.64 (t,  $J = 6.1$  Hz, 2H), 1.45 (bs, 9H), 1.04 (dd,  $J = 6.2, 33.2$  Hz, 6H). HRMS  $m/z$  calculated for  $\text{C}_{19}\text{H}_{32}\text{N}_4\text{O}_3\text{S}$   $[\text{M} + \text{H}]^+$ : 397.2273. Found: 397.2289. The pure product **5b** was acquired as a clear oil (0.055g, 43%). TLC: EtOAc/MeOH 90:10 (Rf. 0.42).  $^1\text{H}$  NMR (400 MHz,  $\text{CDCl}_3$ )  $\delta$  8.55 (m, 2H), 7.97 (t,  $J = 6.5$  Hz, 1H), 7.62 (d,  $J = 7.9$  Hz, 1H), 4.92 (bs, 1H (NH)), 4.48 (d,  $J = 6.2$  Hz, 2H), 3.32-3.29 (m, 3H), 3.04 (m, 1H), 2.77 (dd,  $J = 5.4, 8.0$  Hz, 2H), 2.64 (t,  $J = 6.3$  Hz, 2H) 1.71-1.53 (bm, 8H), 1.45 (bs, 9H). HRMS  $m/z$  calculated for  $\text{C}_{21}\text{H}_{34}\text{N}_4\text{O}_3\text{S}$   $[\text{M} + \text{H}]^+$ : 423.2430. Found: 423.2426. The pure product **5c** was obtained as a white fluffy solid (0.08g, 58%). TLC: EtOAc/MeOH 90:10 (Rf. 0.55).  $^1\text{H}$  NMR (500 MHz,  $\text{CDCl}_3$ )  $\delta$  8.54 (m, 2H), 7.59 (d,  $J = 7.8$  Hz, 1H), 7.46 (d,  $J = 5.6$  Hz, 1H), 7.28-7.23 (m, 2H), 6.89 (t,  $J = 7.4$  Hz, 1H), 6.71 (d,  $J = 8.2$  Hz, 2H), 4.97 (bs, 1H (NH)), 4.66 (bs, 1H), 4.57 (dd,  $J = 6.3, 15.1$  Hz, 1H), 4.46 (dd,  $J = 6.1, 15.1$  Hz, 1H), 3.99 (bs, 1H (NH)), 3.35 (m, 2H), 3.22 (dd,  $J = 4.3, 13.6$  Hz, 1H), 3.06 (q,  $J = 7.1$  Hz, 1H), 2.67 (t,  $J = 6.3$  Hz, 2H), 1.95 (bs, 1H (NH)), 1.48 (bs, 9H). HRMS  $m/z$  calculated for  $\text{C}_{22}\text{H}_{30}\text{N}_4\text{O}_3\text{S}$   $[\text{M} + \text{Na}]^+$ : 453.1936. Found: 453.1947.

#### General Procedure for Synthesis of Compounds **6a,b**

*N*-Boc-phenylalaninol (1.6g, 6.4 mmol) was added to dry DCM (15 ml). To this solution, *p*-toluenesulfonyl chloride (1.82g, 9.5 mmol, 1.5 eq) and triethylamine (1.93g, 19.1 mmol, 3 eq) were slowly added at  $0^\circ\text{C}$ . The reaction was allowed to slowly come to room temperature overnight. After the reaction completion, DCM was evaporated and the crude mixture was purified using column chromatography (1:1 hexane:EtOAc), affording the pure product **6a** as an off white powder (2.05g, 79%). TLC: hexane/EtOAc 1:1 (Rf. 0.64).  $^1\text{H}$  NMR (500 MHz,  $\text{CDCl}_3$ )  $\delta$  7.84 (d,  $J = 8.0$  Hz, 2H), 7.46-7.25 (m, 5H), 7.14 (d,  $J = 7.2$  Hz, 2H), 4.78 (bs, 1H (NH)), 4.07 (t,  $J = 9.8$  Hz, 2H), 3.95 (d,  $J = 7.8$  Hz, 1H), 2.96 (m, 1H), 2.84 (m, 1H), 2.52 (s, 3H), 1.45 (s, 9H). HRMS  $m/z$  calculated for  $\text{C}_{21}\text{H}_{27}\text{NO}_5\text{S}$   $[\text{M} + \text{Na}]^+$ : 428.1508. Found: 428.1527. The pure product **6b** was acquired as off white crystals (1.76g, 72%). TLC: hexane/EtOAc 1:1 (Rf. 0.46).  $^1\text{H}$  NMR (400 MHz,  $\text{CDCl}_3$ )  $\delta$  8.00 (bs, 1H (NH)), 7.76 (d,  $J = 8.1$  Hz, 2H), 7.60 (t,  $J = 6.5$  Hz, 1H), 7.36 (d,  $J = 8.0$  Hz, 1H), 7.31 (d,  $J = 8.2$  Hz, 2H), 7.11 (t,  $J = 7.4$  Hz, 2H), 7.00 (s, 1H), 4.76 (bs, 1H (NH)), 4.20-4.12 (m, 1H), 4.00 (s, 2H), 3.02 (m, 2H), 2.45 (s, 3H), 1.41 (s, 9H). HRMS  $m/z$  calculated for  $\text{C}_{23}\text{H}_{28}\text{N}_2\text{O}_5\text{S}$   $[\text{M} + \text{Na}]^+$ : 467.1617. Found: 467.1633.

#### General Procedure for Synthesis of Compounds **7a-f**

To a solution of compound **6a** (0.23g, 0.56 mmol) in DMF (5 ml), compound **1a** (0.11g, 0.68 mmol, 1.23 eq) was added. To this mixture, 1 N NaOH (2 ml) was added, and the reaction was allowed to stir at  $50^\circ\text{C}$  overnight. The crude product **7a** was obtained by evaporating the

solvent and used in the next step without any further purification. HRMS  $m/z$  calculated for  $C_{20}H_{32}N_2O_4S$   $[M + Na]^+$ : 419.1981. Found: 419.1986. **7b** formed a white precipitate, which was collected, washed with  $H_2O$ , and dried (0.14g, 55%). HRMS  $m/z$  calculated for  $C_{22}H_{34}N_2O_4S$   $[M + Na]^+$ : 445.2137. Found: 445.2130. **7c** HRMS  $m/z$  calculated for  $C_{23}H_{30}N_2O_4S$   $[M + H]^+$ : 431.2004. Found: 431.1992. **7d** HRMS  $m/z$  calculated for  $C_{22}H_{33}N_3O_4S$   $[M + Na]^+$ : 458.2090. Found: 458.2098. **7e** HRMS  $m/z$  calculated for  $C_{24}H_{35}N_3O_4S$   $[M + Na]^+$ : 484.2246. Found: 484.2244. **7f** HRMS  $m/z$  calculated for  $C_{25}H_{31}N_2O_4S$   $[M + H]^+$ : 470.2114. Found: 470.2111.

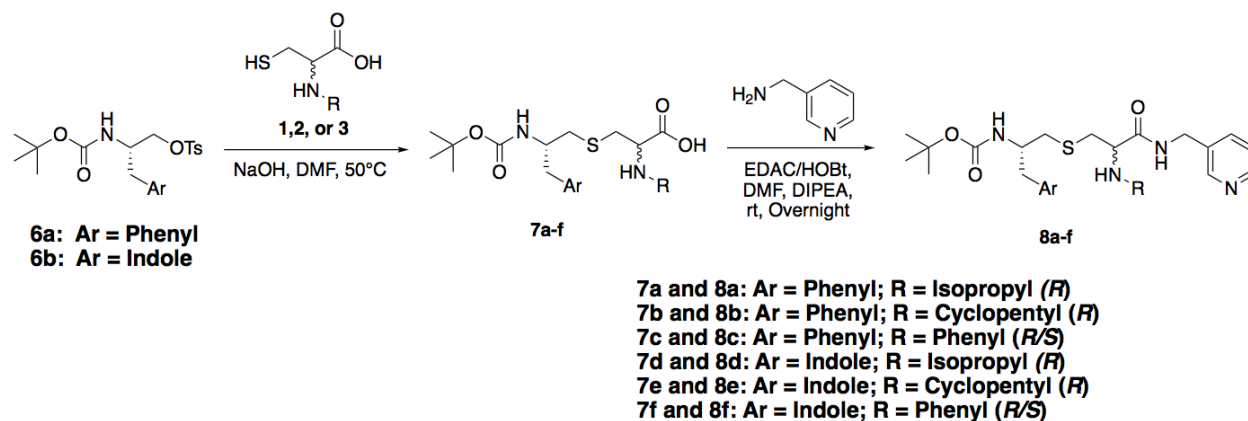

Scheme 3

#### General Procedure for Synthesis of Compounds **8a-f**

Crude **7a** (0.3g, 0.75 mmol) was dissolved in DMF (5 ml). To this solution, EDAC (0.22g, 1.13 mmol, 1.5 eq) and HOBt (0.17g, 1.13 mmol, 1.5 eq) were added, followed by the addition of 3-(aminomethyl)pyridine (0.12g, 1.13 mmol, 1.5 eq) and DIPEA (0.29g, 2.25 mmol, 3 eq). The reaction was stirred at room temperature overnight. Upon completion, the solvent was evaporated and the reaction mixture was diluted with ethyl acetate. The organic layer was then washed with saturated  $NaHCO_3$ , water, and brine. The combined organic layers were dried over  $MgSO_4$  and concentrated *in vacuo* to give the crude product, which was purified via column chromatography (95:5 EtOAc:MeOH). The pure product **8a** was obtained as yellow gum (0.054g, 20%). TLC: EtOAc/MeOH 90:10 (Rf. 0.48).  $^1H$  NMR (400 MHz,  $CDCl_3$ )  $\delta$  8.53 (m, 2H), 7.98 (t,  $J = 5.5$  Hz, 1H), 7.61 (d,  $J = 7.7$  Hz, 1H), 7.33-7.19 (m, 5H), 4.66 (bs, 1H (NH)), 4.45 (d,  $J = 6.3$  Hz, 2H), 3.99 (bs, 1H (NH)), 3.31 (q,  $J = 4.0$  Hz, 1H), 3.04 (dd,  $J = 4.0, 13.4$  Hz, 1H), 2.86 (d,  $J = 6.4$  Hz, 2H), 2.81-2.72 (m, 2H), 2.64 (m, 2H), 1.40 (bs, 9H), 1.02 (dd,  $J = 6.2, 25.8$  Hz, 6H). HRMS  $m/z$  calculated for  $C_{26}H_{38}N_4O_3S$   $[M + H]^+$ : 487.2743. Found: 487.2752. The pure product **8b** was acquired as an opaque oil (0.09g, 57%). TLC: EtOAc/MeOH 90:10 (Rf. 0.53).  $^1H$  NMR (400 MHz,  $CDCl_3$ )  $\delta$  8.53 (m, 2H), 7.95 (t,  $J = 5.4$  Hz, 1H), 7.62 (d,  $J = 7.8$  Hz, 1H), 7.32-7.19 (m, 5H), 4.67 (bs, 1H (NH)), 4.45 (d,  $J = 6.2$  Hz, 2H), 3.98 (bs, 1H (NH)), 3.30 (q,  $J = 3.8$  Hz, 1H), 3.06 (m, 2H), 2.86

(d,  $J = 6.0$  Hz, 2H), 2.78 (q,  $J = 7.2$  Hz, 1H), 2.64 (m, 2H), 2.17 (bs, 2H), 1.81-1.50 (bs, 6H), 1.40 (bs, 9H). HRMS  $m/z$  calculated for  $C_{28}H_{40}N_4O_3S$   $[M + H]^+$ : 513.2899. Found: 513.2916. The pure product **8c** was obtained as a white fluffy solid (0.03g, 19%). TLC: EtOAc/MeOH 90:10 (Rf. 0.62).  $^1H$  NMR (500 MHz,  $CDCl_3$ )  $\delta$  8.54 (m, 2H), 7.59 (t,  $J = 4.0$  Hz, 1H), 7.42 (m, 1H), 7.34-7.19 (m, 7H), 6.89 (m, 1H), 6.70 (q,  $J = 7.1$  Hz, 2H), 4.77 (bd,  $J = 26.3$  Hz, 1H), 4.67 (bs, 1H (NH)), 4.53 (td,  $J = 6.2, 15.7$  Hz, 1H), 4.45 (td,  $J = 6.0, 15.7$  Hz, 1H), 4.05 (bs, 1H (NH)), 3.97 (bs, 1H), 3.26-3.05 (m, 2H), 2.88 (m, 2H), 2.65 (m, 2H), 1.85 (bs, 1H (NH)), 1.46 (d,  $J = 9.7$  Hz, 9H). HRMS  $m/z$  calculated for  $C_{29}H_{36}N_4O_3S$   $[M + Na]^+$ : 543.2406. Found: 543.2408. The pure product **8d** was acquired as a white fluffy solid (0.07g, 30%). TLC: EtOAc/MeOH 90:10 (Rf. 0.42).  $^1H$  NMR (500 MHz,  $CDCl_3$ )  $\delta$  8.58 (m, 2H), 8.44 (bs, 1H (NH)), 8.03 (t,  $J = 6.1$  Hz, 1H), 7.68 (dd,  $J = 7.6, 24.2$  Hz, 2H), 7.41 (d,  $J = 8.0$  Hz, 1H), 7.32-7.23 (m, 1H), 7.17 (t,  $J = 7.1$  Hz, 1H), 7.10 (s, 1H), 4.83 (bs, 1H (NH)), 4.47 (d,  $J = 5.7$  Hz, 2H), 4.14 (bs, 1H (NH)), 3.36 (m, 1H), 3.10 (m, 2H), 2.84 (m, 1H), 2.78 (m, 1H), 2.69 (dd,  $J = 5.4, 16.2$  Hz, 2H), 1.91 (bs, 2H), 1.46 (s, 9H), 1.05 (dd,  $J = 6.0, 26.3$  Hz, 6H). HRMS  $m/z$  calculated for  $C_{28}H_{39}N_5O_3S$   $[M + Na]^+$ : 548.2672. Found: 548.2670. The pure product **8e** was obtained as a white fluffy solid (0.09g, 36%). TLC: EtOAc/MeOH 90:10 (Rf. 0.5).  $^1H$  NMR (500 MHz,  $CDCl_3$ )  $\delta$  8.64 (bs, 1H (NH)), 8.58 (m, 2H), 8.00 (t,  $J = 6.0$  Hz, 1H), 7.67 (dd,  $J = 7.8, 21.5$  Hz, 2H), 7.39 (d,  $J = 8.1$  Hz, 1H), 7.23 (t,  $J = 7.6$  Hz, 1H), 7.16 (t,  $J = 7.5$  Hz, 1H), 7.09 (s, 1H), 4.83 (bs, 1H (NH)), 4.47 (d,  $J = 6.2$  Hz, 2H), 4.14 (bs, 1H (NH)), 3.34 (q,  $J = 4.0$  Hz, 1H), 3.10-3.04 (m, 2H), 3.04 (m, 1H), 2.82 (q,  $J = 7.1$  Hz, 1H), 2.78 (m, 1H), 2.71 (dd,  $J = 6.0, 13.1$  Hz, 1H), 2.65 (dd,  $J = 5.4, 13.2$  Hz, 1H), 2.08 (bs, 2H), 1.83-1.52, 1.31 (m, 8H), 1.47 (s, 9H). HRMS  $m/z$  calculated for  $C_{30}H_{41}N_5O_3S$   $[M + H]^+$ : 552.3008. Found: 552.3007. The pure product **8f** was acquired as a white fluffy solid (0.032g, 17%). TLC: EtOAc/MeOH 90:10 (Rf. 0.6).  $^1H$  NMR (500 MHz,  $CDCl_3$ )  $\delta$  8.53 (m, 2H), 8.37 (bs, 1H (NH)), 7.66 (d,  $J = 7.8$  Hz, 1H), 7.56 (t,  $J = 6.9$  Hz, 1H), 7.46-7.39 (m, 2H), 7.28-7.19 (m, 3H), 7.16 (q,  $J = 6.7$  Hz, 1H), 7.03 (d,  $J = 5.5$  Hz, 1H), 6.99 (m, 1H), 6.69 (dd,  $J = 7.8, 18.1$  Hz, 2H), 4.82 (bs, 1H (NH)), 4.73 (bd,  $J = 35.8$  Hz, 1H), 4.50 (td,  $J = 6.2, 15.3$  Hz, 1H), 4.40 (dt,  $J = 5.0, 15.1$  Hz, 1H), 4.17 (bs, 1H (NH)), 3.99 (bd,  $J = 54$  Hz, 1H), 3.24-2.99 (m, 4H), 2.68 (m, 2H), 1.91 (bs, 1H (NH)), 1.48 (d,  $J = 15.4$  Hz, 9H). HRMS  $m/z$  calculated for  $C_{31}H_{37}N_5O_3S$   $[M + Na]^+$ : 582.2515. Found: 582.2527.

The purity of compounds **5a-c** and **8a-f** was >95% as determined by NMR, with the exception of occasional residual solvent (noted on spectra where applicable). HRMS and NMR spectra for all compounds are shown after Table S2.

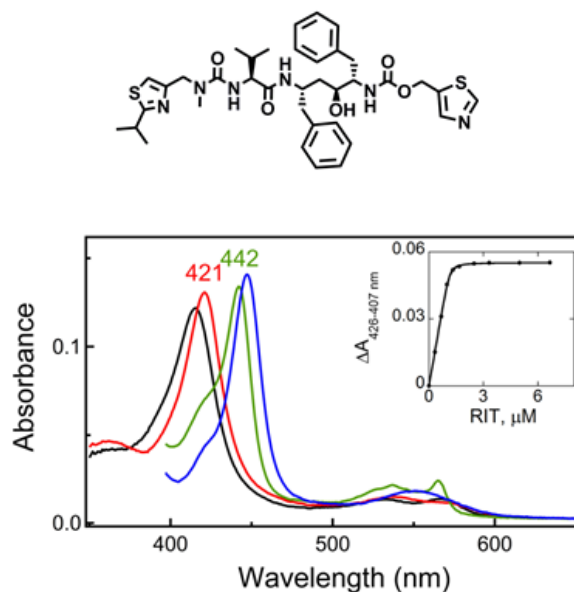

**Figure S1.** Chemical structure and spectral changes induced by ritonavir in CYP3A4. Spectra of the ferric ligand-free and ritonavir-bound CYP3A4 are shown in black and red, respectively. Spectra of the ferrous and ferrous CO-bound forms are in green and blue, respectively. *Inset* is a titration plot and quadratic fit, which gives the  $K_s$  value of 17 nM.

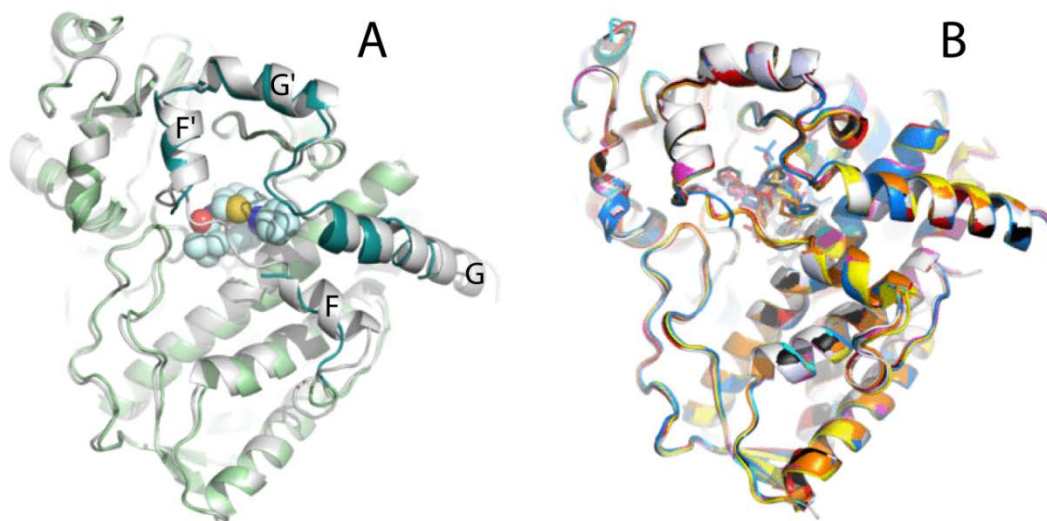

**Figure S2. A**, Structural overlay of the ligand-free (PDB ID 5VCC; in gray) and **8c**-bound CYP3A4 (in shades of green). **8c** is in cpk representation. The F, F', G' and G helices are labeled to show that binding of **8c** leads to disorder of the F-F' loop, unwinding of the F-helix, and positional shift of the G-helix. No major alterations were observed in other ligand-bound structures (panel **B**): **5a** - cyan, **5b** - magenta, **5c** - yellow, **8a** - pale blue, **8b** - orange, **8c** - blue, **8d** - red, **8e** - black, and **8f** - green.

**Table S1.** Data collection and refinement statistics

| Ligand                         | <b>5a</b>                                                                                             | <b>5b</b>                                                                                             | <b>5c</b>                                                                                             | <b>8a</b>                                                                                             | <b>8b</b>                                                                                             |
|--------------------------------|-------------------------------------------------------------------------------------------------------|-------------------------------------------------------------------------------------------------------|-------------------------------------------------------------------------------------------------------|-------------------------------------------------------------------------------------------------------|-------------------------------------------------------------------------------------------------------|
| PDB ID                         | <b>6BCZ</b>                                                                                           | <b>6BD5</b>                                                                                           | <b>6BD6</b>                                                                                           | <b>6BD7</b>                                                                                           | <b>6BD8</b>                                                                                           |
| <i>Data statistics</i>         |                                                                                                       |                                                                                                       |                                                                                                       |                                                                                                       |                                                                                                       |
| Space group                    | I222                                                                                                  | I222                                                                                                  | I222                                                                                                  | I222                                                                                                  | I222                                                                                                  |
| Unit cell parameters           | $a = 77 \text{ \AA}, b = 101 \text{ \AA},$<br>$c = 128 \text{ \AA}; \alpha, \beta, \gamma = 90^\circ$ | $a = 77 \text{ \AA}, b = 102 \text{ \AA},$<br>$c = 129 \text{ \AA}; \alpha, \beta, \gamma = 90^\circ$ | $a = 77 \text{ \AA}, b = 101 \text{ \AA},$<br>$c = 127 \text{ \AA}; \alpha, \beta, \gamma = 90^\circ$ | $a = 78 \text{ \AA}, b = 103 \text{ \AA},$<br>$c = 129 \text{ \AA}; \alpha, \beta, \gamma = 90^\circ$ | $a = 76 \text{ \AA}, b = 101 \text{ \AA},$<br>$c = 124 \text{ \AA}; \alpha, \beta, \gamma = 90^\circ$ |
| Molecules per asymmetric unit  | 1                                                                                                     | 1                                                                                                     | 1                                                                                                     | 1                                                                                                     | 1                                                                                                     |
| Resolution range (Å)           | 79.39-2.23 (2.35-2.23) <sup>a</sup>                                                                   | 80.03-2.50 (2.64-2.50)                                                                                | 79.38-2.45 (2.58-2.45)                                                                                | 80.29-2.42 (2.55-2.42)                                                                                | 78.35-2.38 (2.51-2.38)                                                                                |
| Total reflections              | 139,233                                                                                               | 62,649                                                                                                | 55,487                                                                                                | 93,759                                                                                                | 69,992                                                                                                |
| Unique reflections             | 24,881                                                                                                | 17,153                                                                                                | 17,706                                                                                                | 19,640                                                                                                | 18,695                                                                                                |
| Redundancy                     | 5.6 (5.4)                                                                                             | 3.7 (3.3)                                                                                             | 3.1 (3.2)                                                                                             | 4.8 (5.0)                                                                                             | 3.7 (3.6)                                                                                             |
| Completeness                   | 99.9 (99.9)                                                                                           | 95.5 (93.4)                                                                                           | 95.1 (97.7)                                                                                           | 98.7 (99.2)                                                                                           | 96.7 (95.5)                                                                                           |
| Average $I/\sigma$             | 11.2 (0.9)                                                                                            | 7.6 (0.2)                                                                                             | 9.1 (0.5)                                                                                             | 9.4 (0.6)                                                                                             | 8.7 (0.4)                                                                                             |
| $R_{\text{merge}}$             | 0.049 (1.813)                                                                                         | 0.057 (3.494)                                                                                         | 0.049 (1.933)                                                                                         | 0.056 (1.971)                                                                                         | 0.052 (2.453)                                                                                         |
| $R_{\text{pim}}$               | 0.023 (0.858)                                                                                         | 0.032 (2.125)                                                                                         | 0.032 (1.270)                                                                                         | 0.029 (0.951)                                                                                         | 0.030 (1.408)                                                                                         |
| CC $\frac{1}{2}$               | 0.999 (0.300)                                                                                         | 0.997 (0.371)                                                                                         | 0.997 (0.399)                                                                                         | 0.998 (0.309)                                                                                         | 0.994 (0.341)                                                                                         |
| <i>Refinement statistics</i>   |                                                                                                       |                                                                                                       |                                                                                                       |                                                                                                       |                                                                                                       |
| $R/R_{\text{free}}^{\text{b}}$ | 20.0 (26.1)                                                                                           | 20.9 (27.5)                                                                                           | 20.4/26.7                                                                                             | 19.3/26.4                                                                                             | 21.2/26.9                                                                                             |
| Number of atoms:               |                                                                                                       |                                                                                                       |                                                                                                       |                                                                                                       |                                                                                                       |
| Protein                        | 3815                                                                                                  | 3780                                                                                                  | 3693                                                                                                  | 3806                                                                                                  | 3753                                                                                                  |
| Solvent                        | 11                                                                                                    | 0                                                                                                     | 0                                                                                                     | 0                                                                                                     | 4                                                                                                     |
| R.m.s. deviations:             |                                                                                                       |                                                                                                       |                                                                                                       |                                                                                                       |                                                                                                       |
| Bond lengths, Å                | 0.009                                                                                                 | 0.010                                                                                                 | 0.009                                                                                                 | 0.009                                                                                                 | 0.009                                                                                                 |
| Bond angles, °                 | 1.224                                                                                                 | 1.276                                                                                                 | 1.117                                                                                                 | 1.142                                                                                                 | 1.290                                                                                                 |

<sup>a</sup>Values in brackets are for the highest resolution shell.<sup>b</sup> $R_{\text{free}}$  was calculated from a subset of 5% of the data that were excluded during refinement.



**Table S2.** Data collection and refinement statistics

| Ligand                           | <b>8c</b>                                                                                             | <b>8d</b>                                                                                             | <b>8e</b>                                                                                             | <b>8f</b>                                                                                             |
|----------------------------------|-------------------------------------------------------------------------------------------------------|-------------------------------------------------------------------------------------------------------|-------------------------------------------------------------------------------------------------------|-------------------------------------------------------------------------------------------------------|
| PDB ID                           | 6BDH                                                                                                  | 6BDI                                                                                                  | 6BDK                                                                                                  | 6BDM                                                                                                  |
| <i>Data statistics</i>           |                                                                                                       |                                                                                                       |                                                                                                       |                                                                                                       |
| Space group                      | I222                                                                                                  | I222                                                                                                  | I222                                                                                                  | I222                                                                                                  |
| Unit cell parameters             | $a = 76 \text{ \AA}, b = 100 \text{ \AA},$<br>$c = 126 \text{ \AA}; \alpha, \beta, \gamma = 90^\circ$ | $a = 78 \text{ \AA}, b = 102 \text{ \AA},$<br>$c = 128 \text{ \AA}; \alpha, \beta, \gamma = 90^\circ$ | $a = 77 \text{ \AA}, b = 102 \text{ \AA},$<br>$c = 128 \text{ \AA}; \alpha, \beta, \gamma = 90^\circ$ | $a = 77 \text{ \AA}, b = 101 \text{ \AA},$<br>$c = 127 \text{ \AA}; \alpha, \beta, \gamma = 90^\circ$ |
| Molecules per asymmetric unit    | 1                                                                                                     | 1                                                                                                     | 1                                                                                                     | 1                                                                                                     |
| Resolution range (Å)             | 78.25-2.25 (2.37-2.25) <sup>a</sup>                                                                   | 79.92-2.57 (2.71-2.57)                                                                                | 79.90-2.67 (2.81-2.67)                                                                                | 79.33-2.60 (2.74-2.60)                                                                                |
| Total reflections                | 89,557                                                                                                | 77,790                                                                                                | 53,812                                                                                                | 70,890                                                                                                |
| Unique reflections               | 22,571                                                                                                | 16,151                                                                                                | 14,250                                                                                                | 15,756                                                                                                |
| Redundancy                       | 4.0 (4.0)                                                                                             | 4.8 (4.8)                                                                                             | 3.8 (3.5)                                                                                             | 4.5 (4.6)                                                                                             |
| Completeness                     | 97.5 (98.1)                                                                                           | 97.8 (97.6)                                                                                           | 96.9 (95.5)                                                                                           | 99.9 (100.0)                                                                                          |
| Average $I/\sigma$               | 7.6 (0.4)                                                                                             | 9.4 (0.9)                                                                                             | 8.0 (0.8)                                                                                             | 7.6 (0.4)                                                                                             |
| $R_{\text{merge}}$               | 0.065 (2.814)                                                                                         | 0.060 (1.817)                                                                                         | 0.069 (1.522)                                                                                         | 0.079 (3.396)                                                                                         |
| $R_{\text{pim}}$                 | 0.035 (1.540)                                                                                         | 0.030 (0.897)                                                                                         | 0.039 (0.914)                                                                                         | 0.042 (1.767)                                                                                         |
| CC $\frac{1}{2}$                 | 0.997 (0.488)                                                                                         | 0.999 (0.315)                                                                                         | 0.998 (0.355)                                                                                         | 0.999 (0.303)                                                                                         |
| <i>Refinement statistics</i>     |                                                                                                       |                                                                                                       |                                                                                                       |                                                                                                       |
| $R/R_{\text{free}}$ <sup>b</sup> | 20.7 (28.0)                                                                                           | 19.2 (24.5)                                                                                           | 20.6/27.2                                                                                             | 20.1/27.5                                                                                             |
| Number of atoms:                 |                                                                                                       |                                                                                                       |                                                                                                       |                                                                                                       |
| Protein                          | 3552                                                                                                  | 3785                                                                                                  | 3778                                                                                                  | 3712                                                                                                  |
| Solvent                          | 30                                                                                                    | 2                                                                                                     | 0                                                                                                     | 0                                                                                                     |
| R.m.s. deviations:               |                                                                                                       |                                                                                                       |                                                                                                       |                                                                                                       |
| Bond lengths, Å                  | 0.009                                                                                                 | 0.010                                                                                                 | 0.009                                                                                                 | 0.010                                                                                                 |
| Bond angles, °                   | 1.096                                                                                                 | 1.202                                                                                                 | 1.138                                                                                                 | 1.198                                                                                                 |

<sup>a</sup>Values in brackets are for the highest resolution shell.<sup>b</sup> $R_{\text{free}}$  was calculated from a subset of 5% of the data that were excluded during refinement.

01ERJ-39\_14 (0.019) Is (1.00,0.01) C6H13NO2SNa

TOF MS ES+  
8.80e12

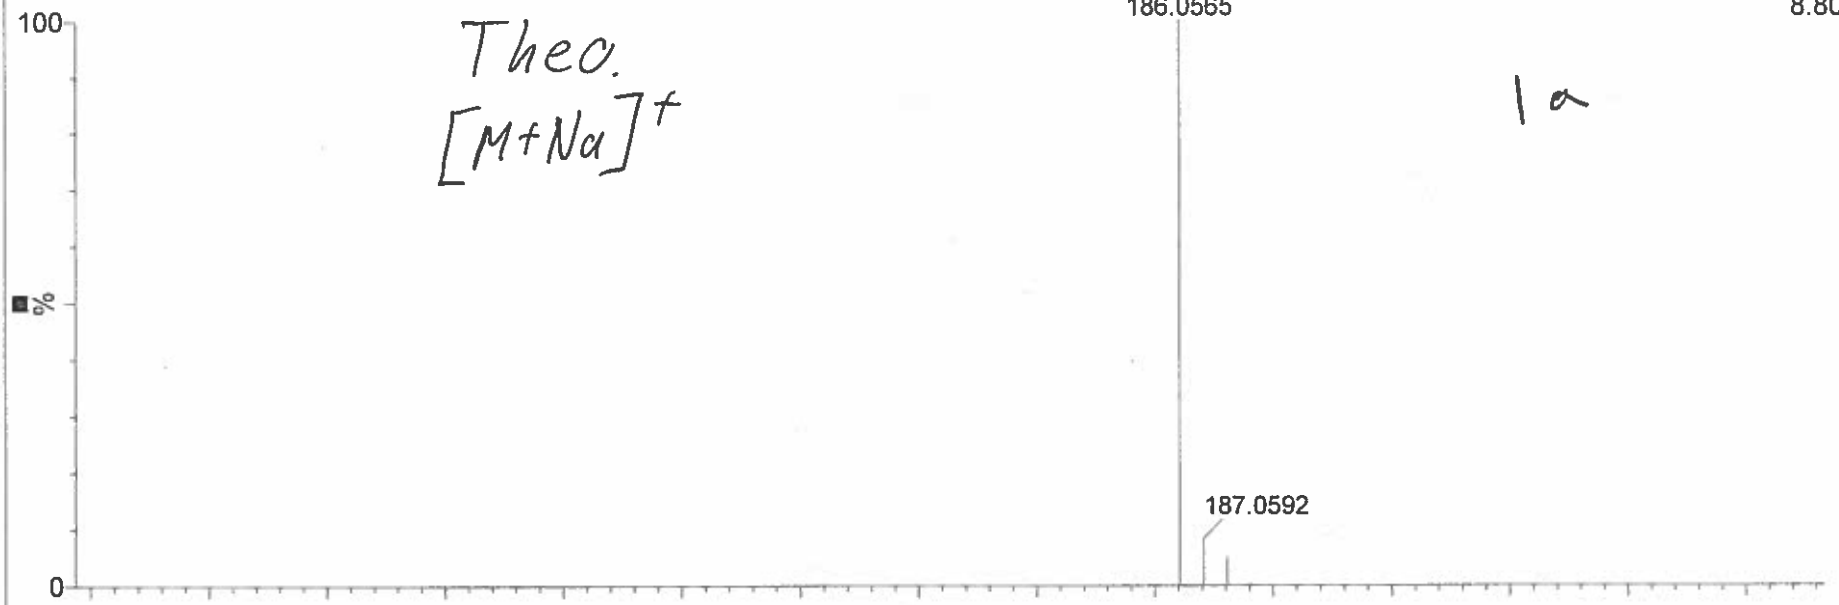

01ERJ-39\_14 22 (0.404) AM (Cen,4, 80.00, Ar,1000.0,173.08,1.00); Sm (SG, 2x3.00); Cm (22:36)

TOF MS ES+  
3.68e4

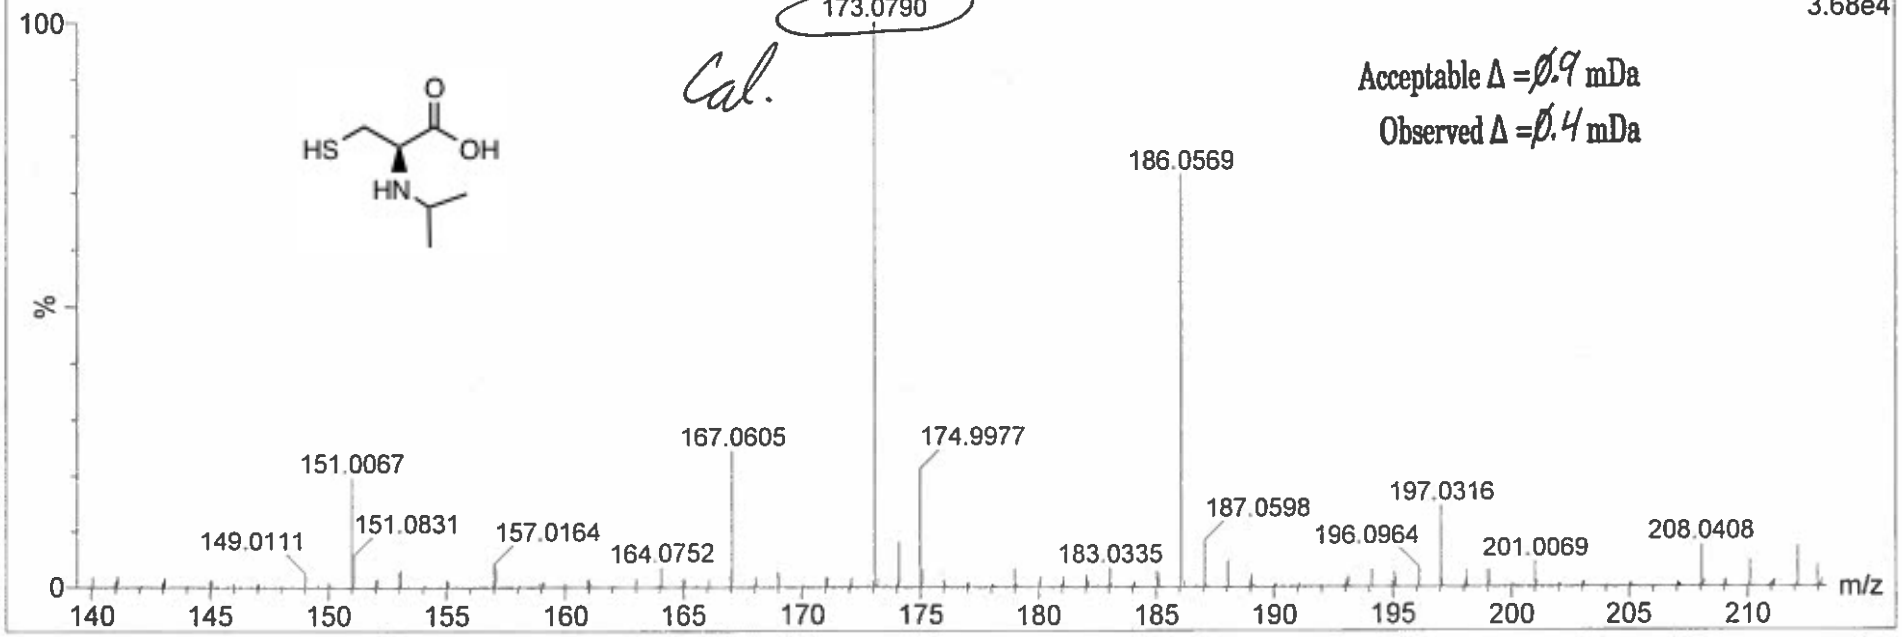

01ERJ-40\_12 (0.019) Is (1.00,0.01) C<sub>8</sub>H<sub>15</sub>NO<sub>2</sub>SH

TOF MS ES+  
8.60e12

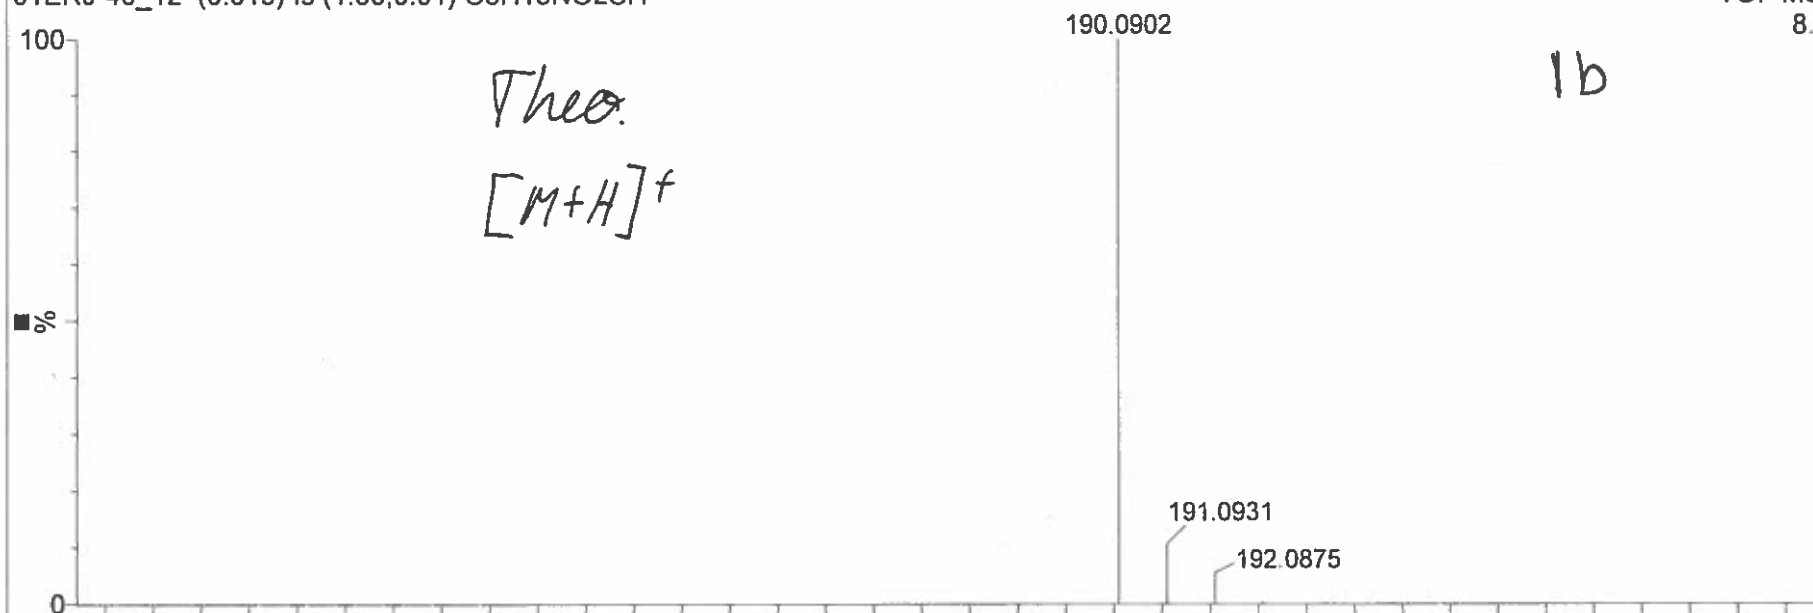

01ERJ-40\_12 12 (0.220) AM (Cen,4, 80.00, Ar,1000.0,187.09,1.00); Sm (SG, 2x3.00); Cm (9:12)

TOF MS ES+  
6.63e3

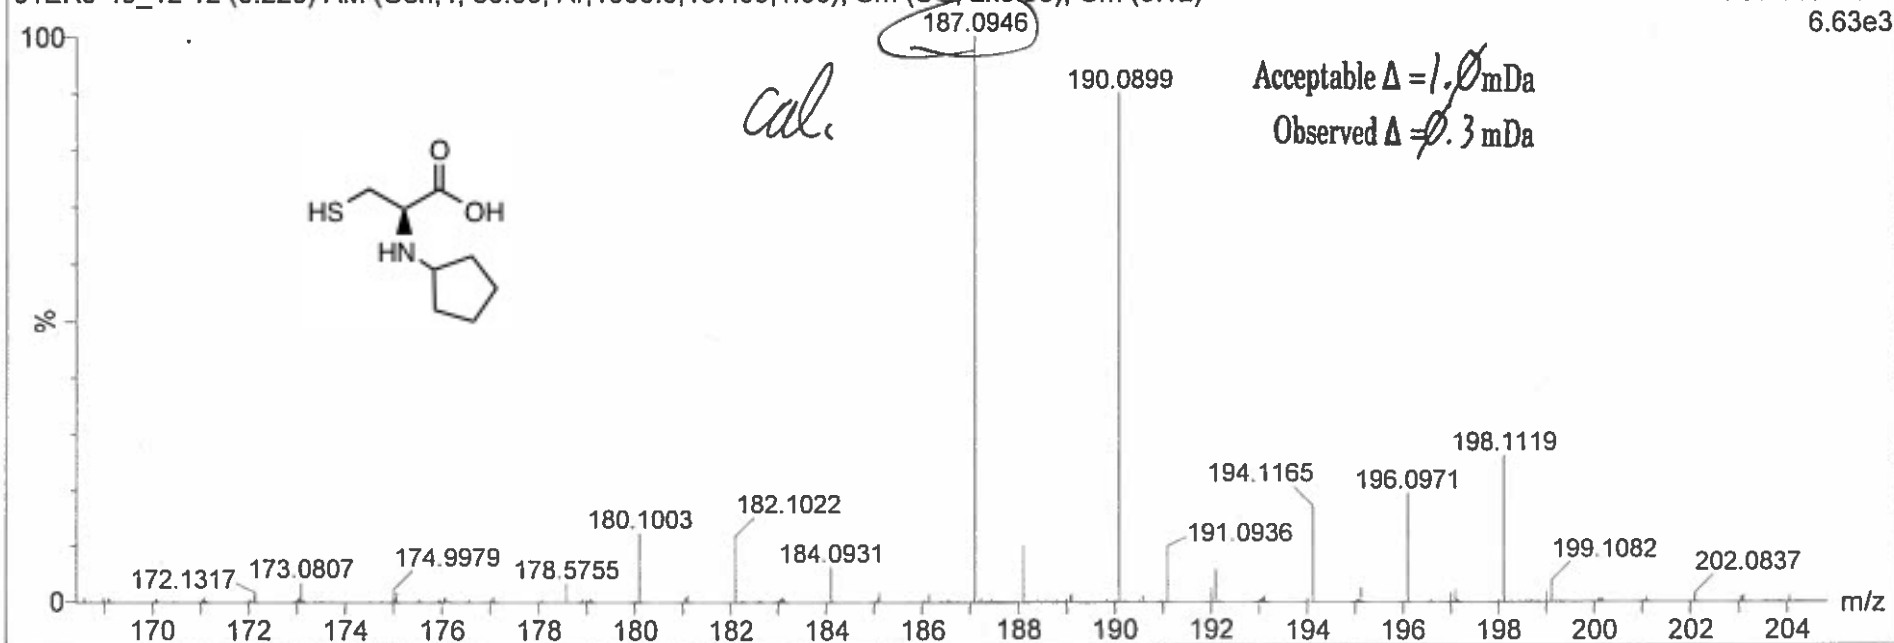

01ERJ-123\_15 (0.019) Is (1.00,0.01) C9H11NO2SNa

TOF MS ES+  
8.52e12

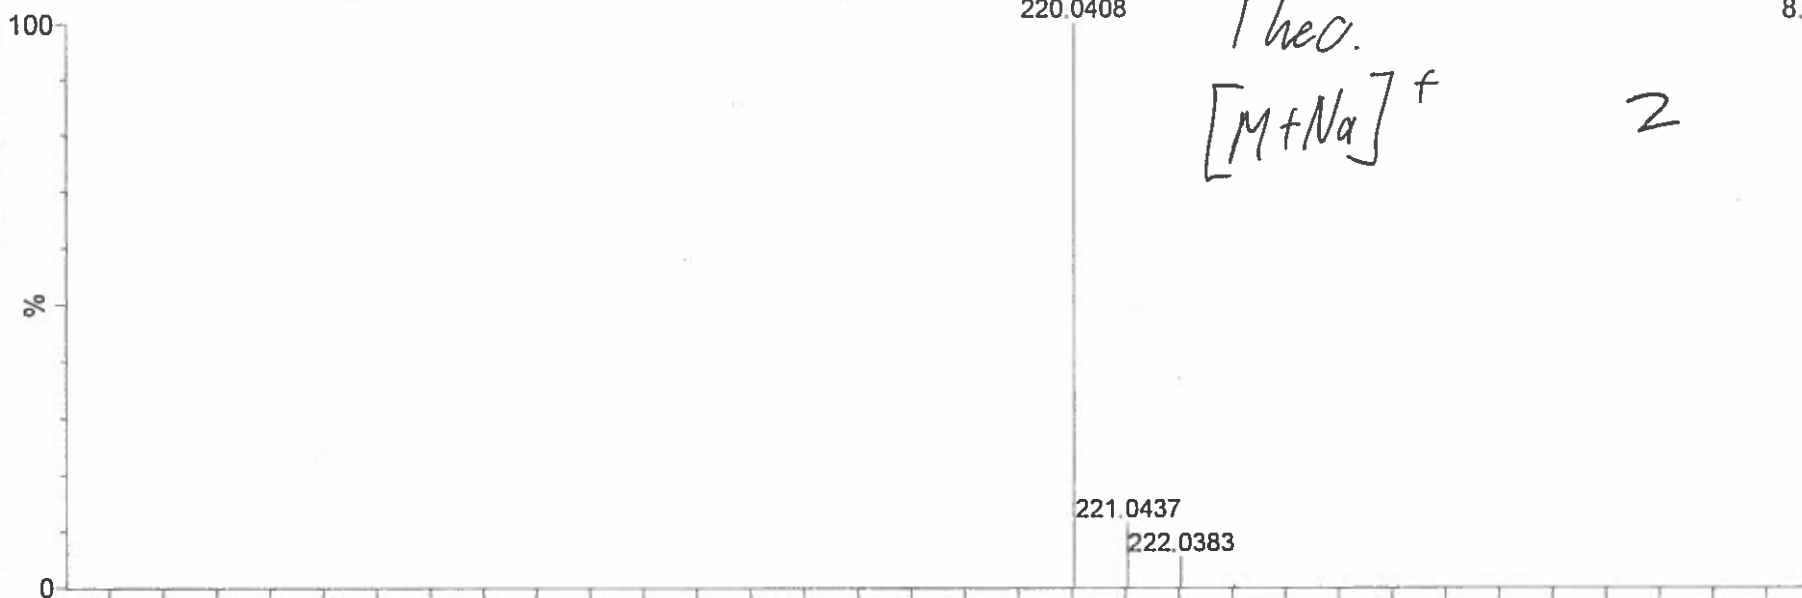

01ERJ-123\_15 32 (0.587) AM (Cen,4, 80.00, Ar,1000.0,231.12,1.00); Sm (SG, 2x3.00); Cm (32:52)

TOF MS ES+  
3.43e4

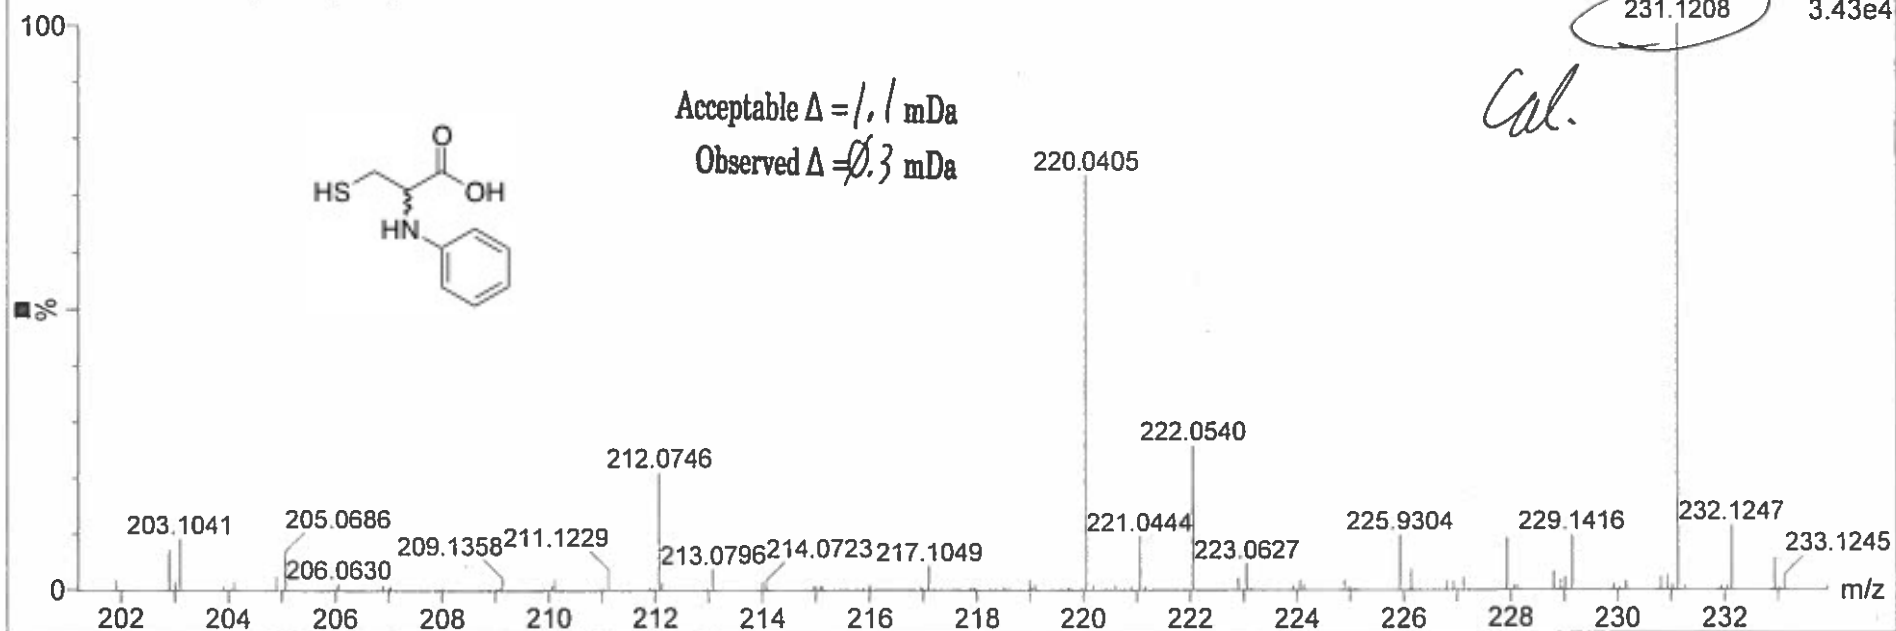

01ERS-55\_04 (0.019) Is (1.00,0.01) C<sub>14</sub>H<sub>21</sub>NO<sub>5</sub>Na

3

TOF MS ES+  
7.99e12

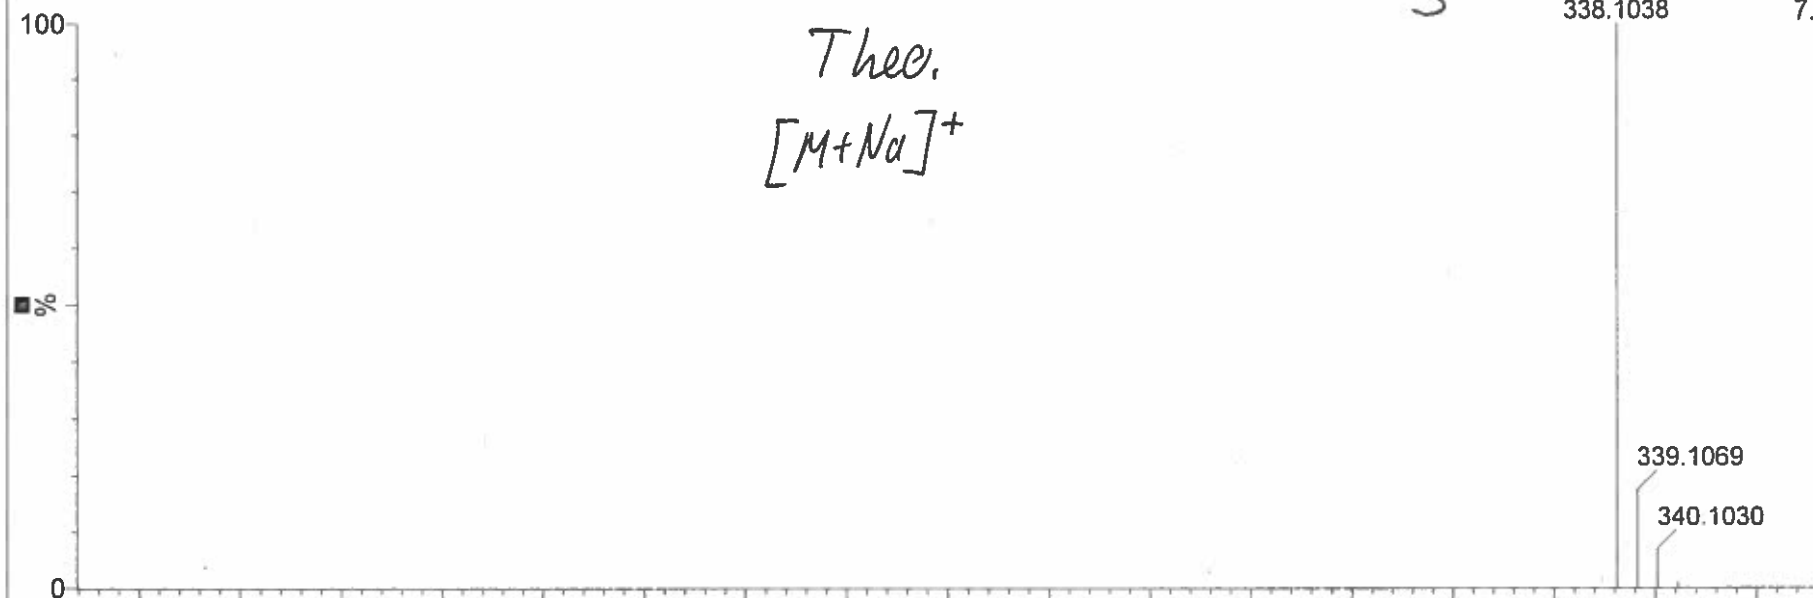

01ERS-55\_04 9 (0.165) AM (Cen,4, 80.00, Ar,1000.0,305.16,1.00); Sm (SG, 2x3.00); Cm (4:9)

Cal.

TOF MS ES+  
2.08e4

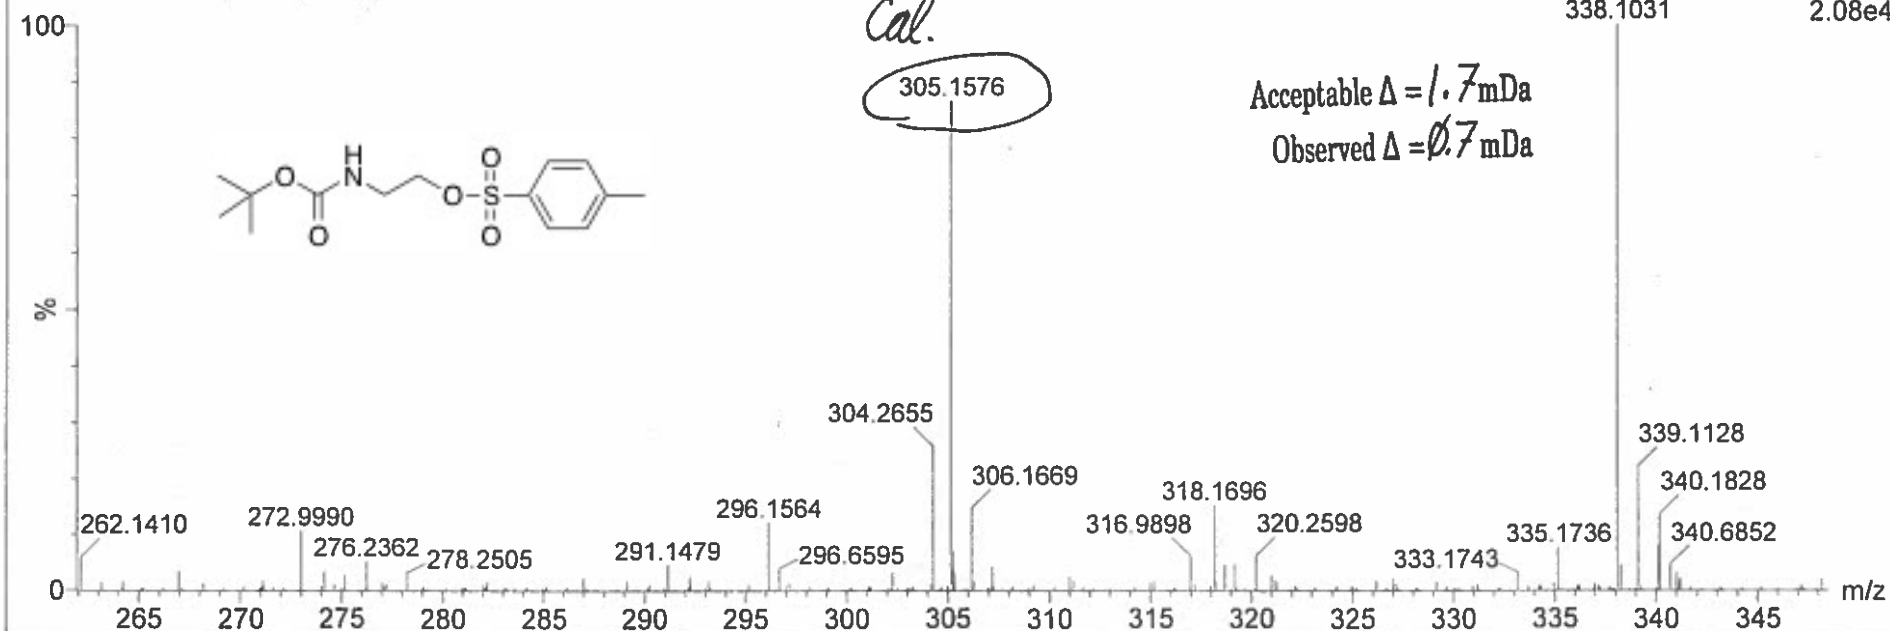

01ERS-59\_04 (0.019) Is (1.00,0.01) C<sub>13</sub>H<sub>26</sub>N<sub>2</sub>O<sub>4</sub>Na

TOF MS ES+  
8.06e12

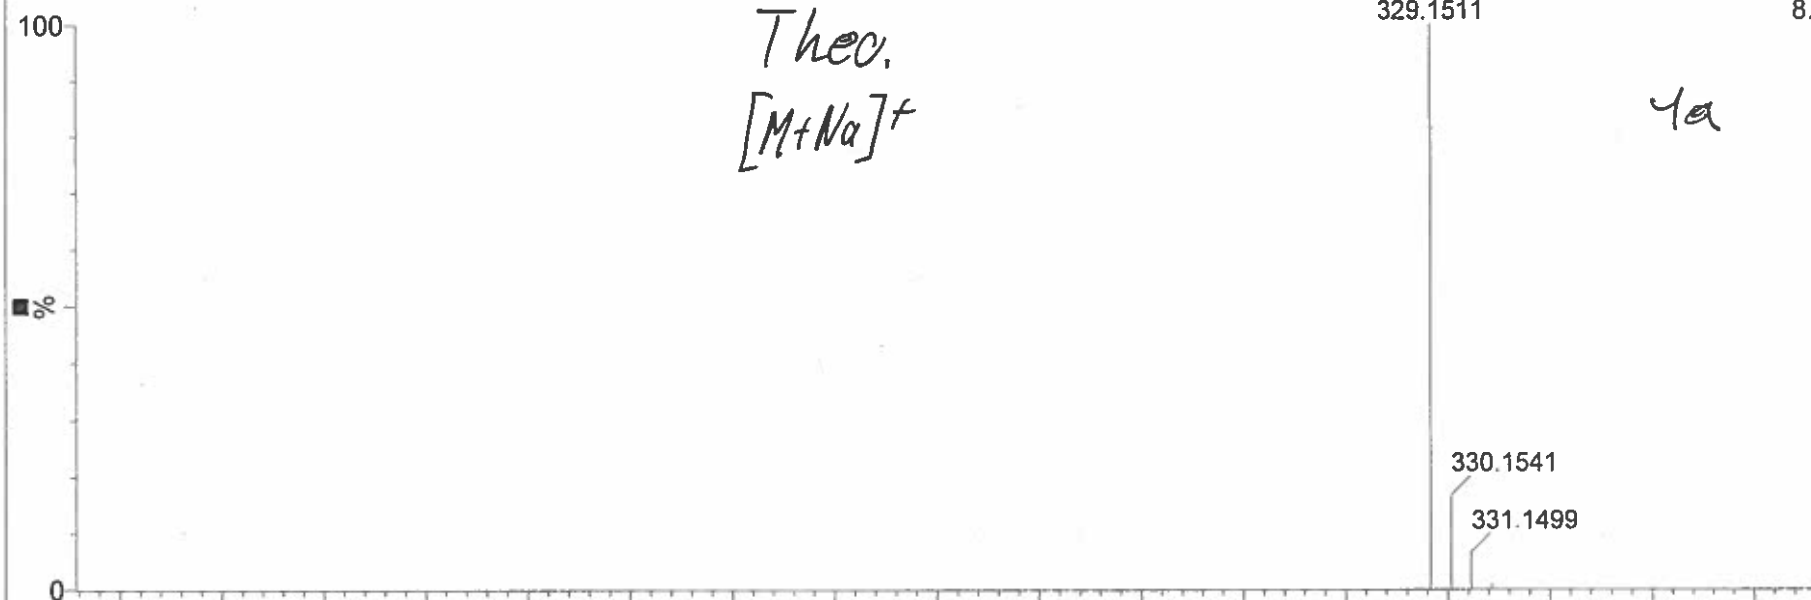

01ERS-59\_04 27 (0.495) AM (Cen,4, 80.00, Ar,1000.0,305.16,1.00); Sm (SG, 2x3.00); Cm (27:35)

TOF MS ES+  
1.23e4

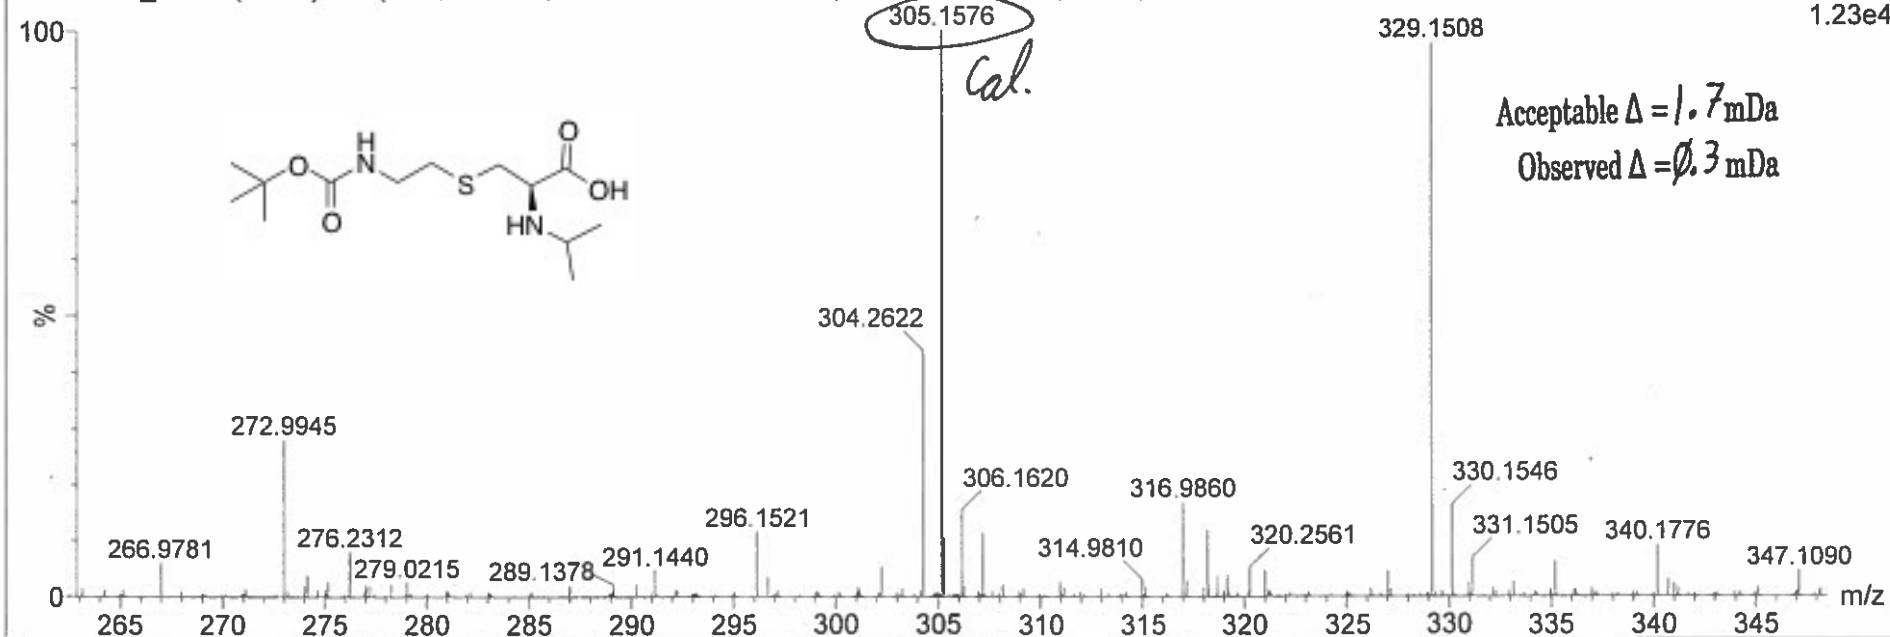

01ERS-56\_04 (0.019) Is (1.00,0.01) C<sub>15</sub>H<sub>28</sub>N<sub>2</sub>O<sub>4</sub>SNa

TOF MS ES+  
7.88e12

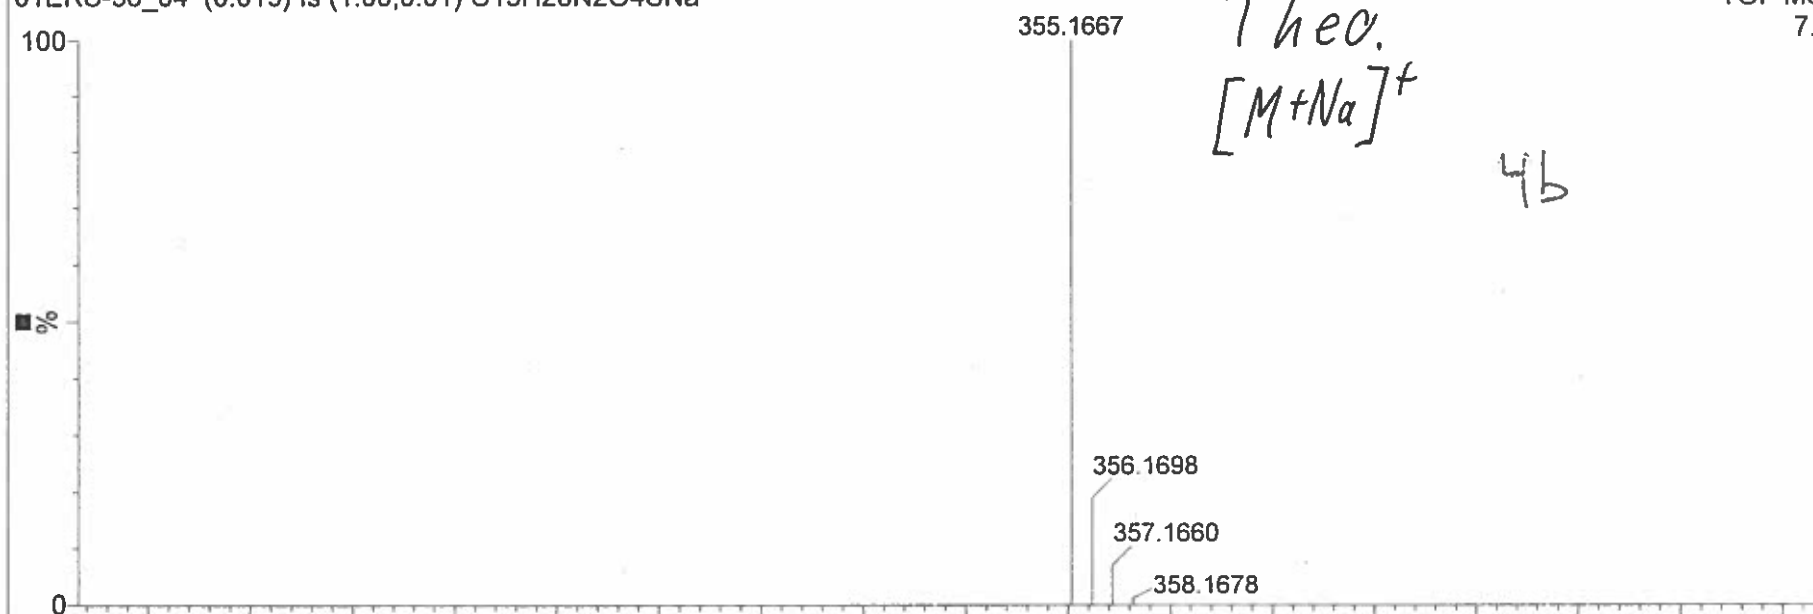

01ERS-56\_04 13 (0.238) AM (Cen,4, 80.00, Ar,1000.0,349.18,1.00); Sm (SG, 2x3.00); Cm (10:18)

TOF MS ES+  
1.26e5

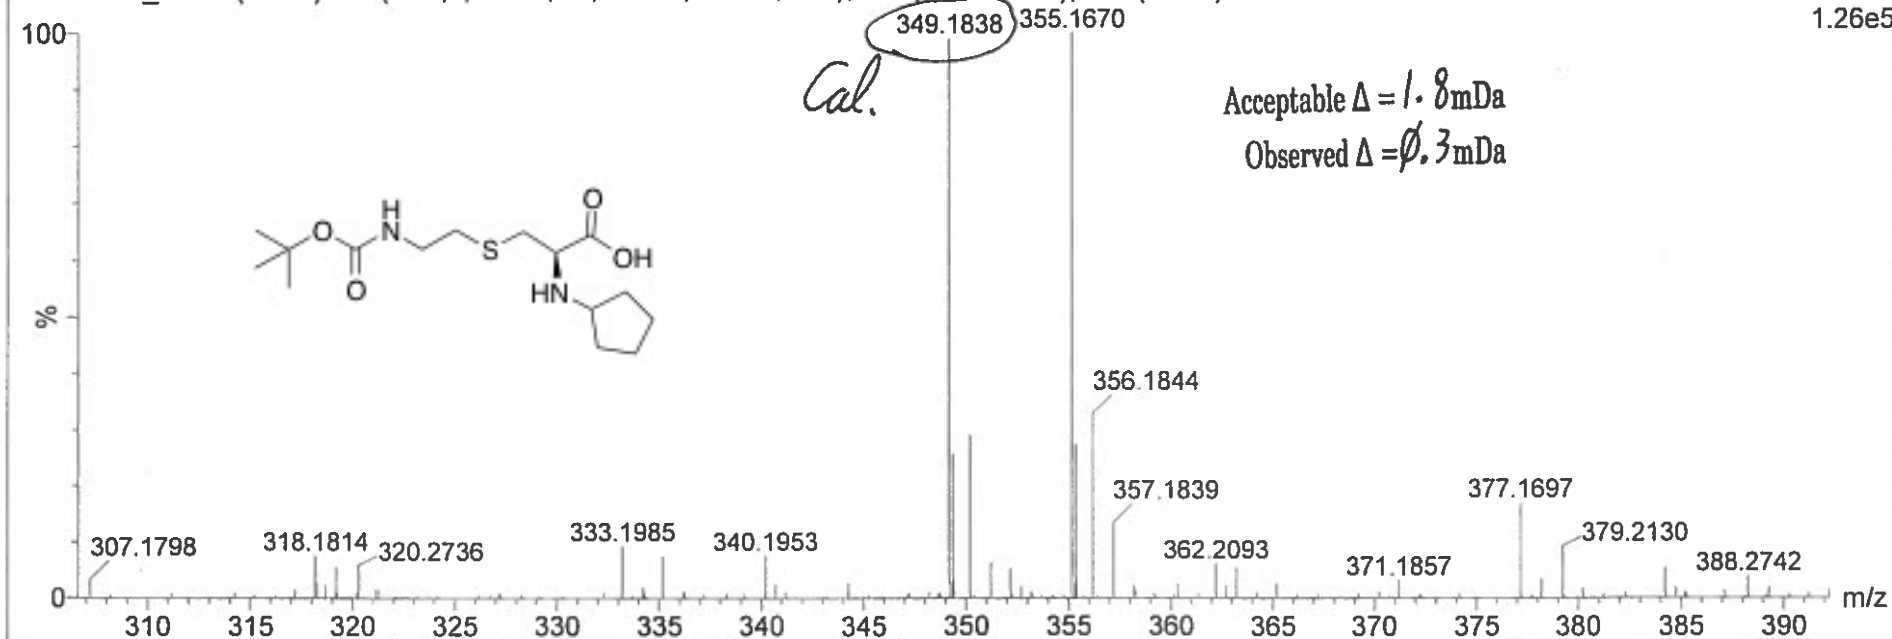

01ERJ-78+HCl\_03 (0.019) Is (1.00,0.01) C16H24N2O4SNa

TOF MS ES+  
7.80e12

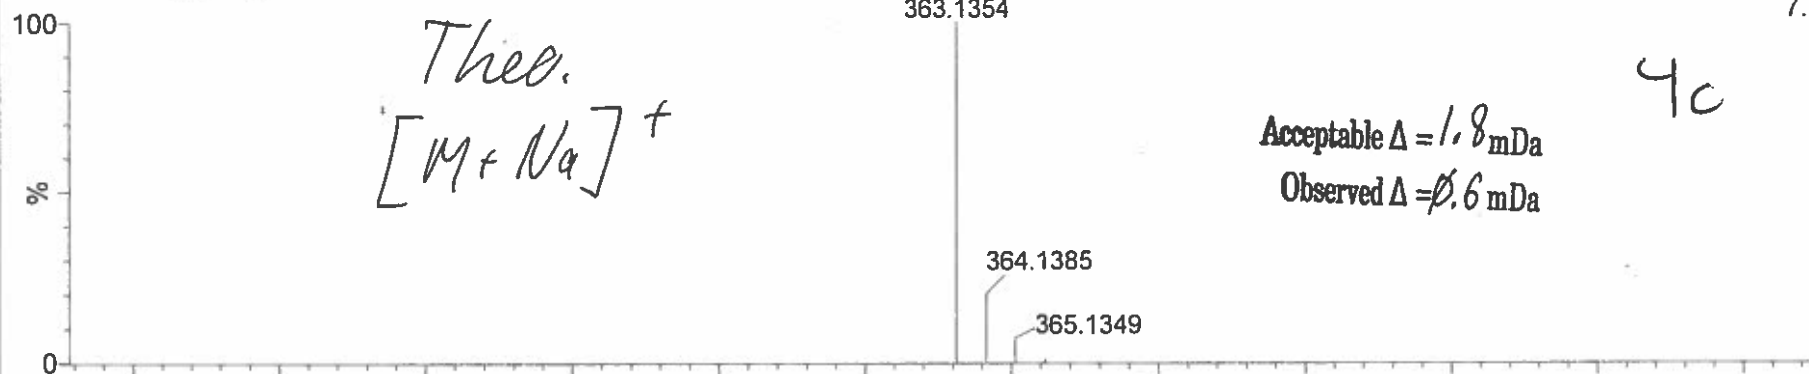

01ERJ-78+HCl\_03 (0.019) Is (1.00,0.01) C16H24N2O4SH

TOF MS ES+  
7.80e12

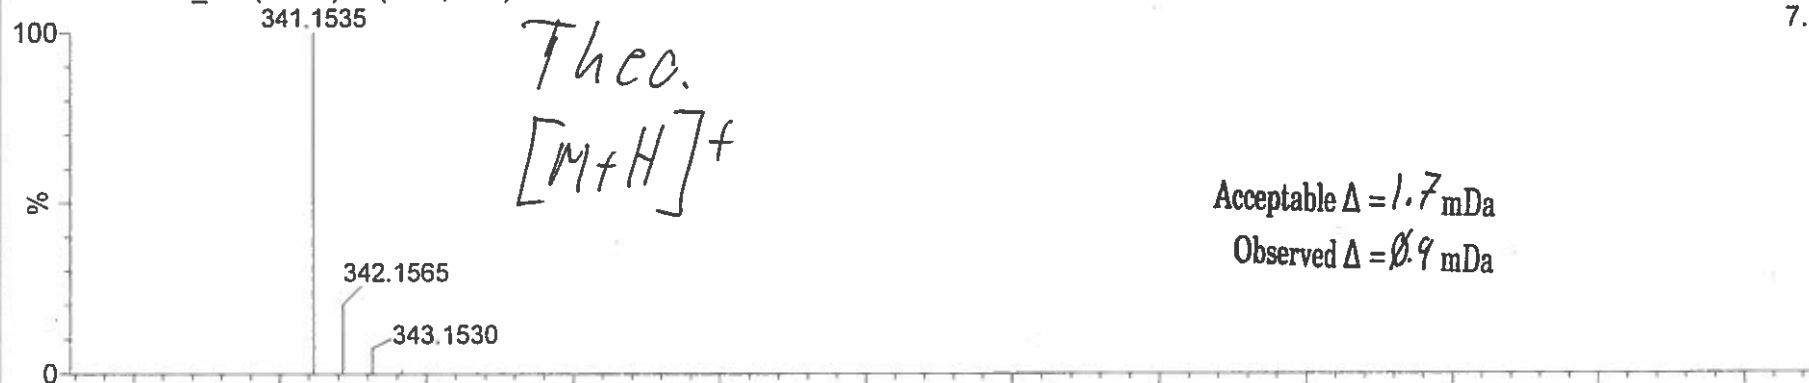

01ERJ-78+HCl\_03 25 (0.458) AM (Cen,4, 80.00, Ar,1000.0,349.18,1.00); Sm (SG, 2x3.00); Cm (25:29)

TOF MS ES+  
9.62e3

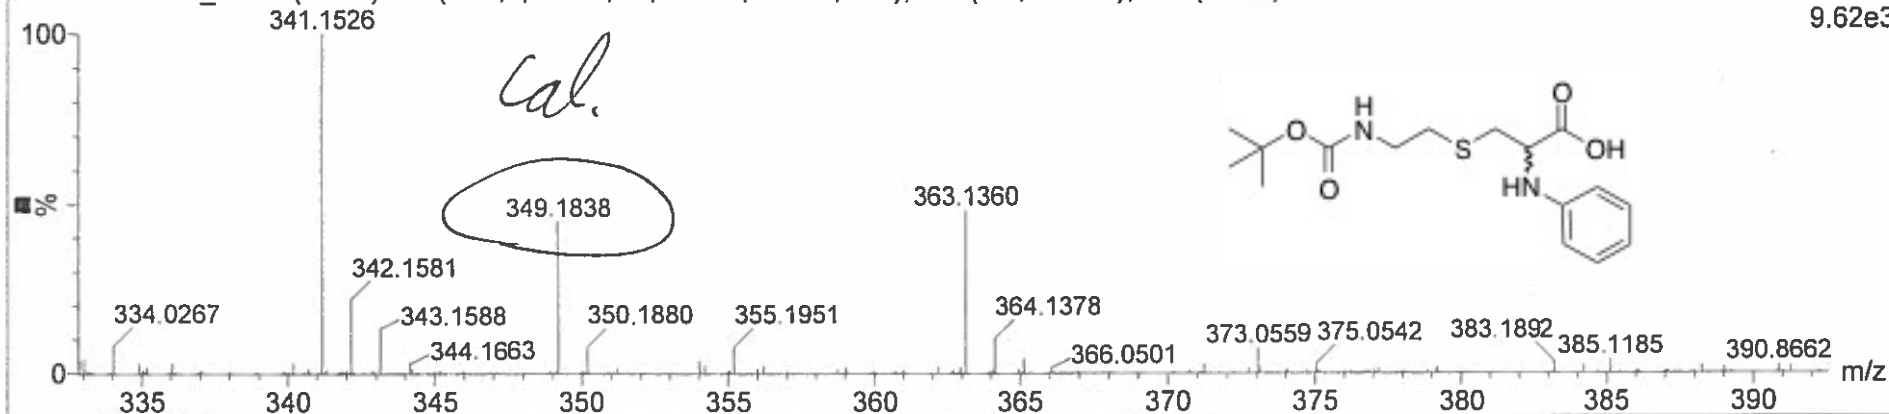



01ERS-61\_08 (0.019) Is (1.00,0.01) C<sub>19</sub>H<sub>32</sub>N<sub>4</sub>O<sub>3</sub>SH

TOF MS ES+  
7.50e12

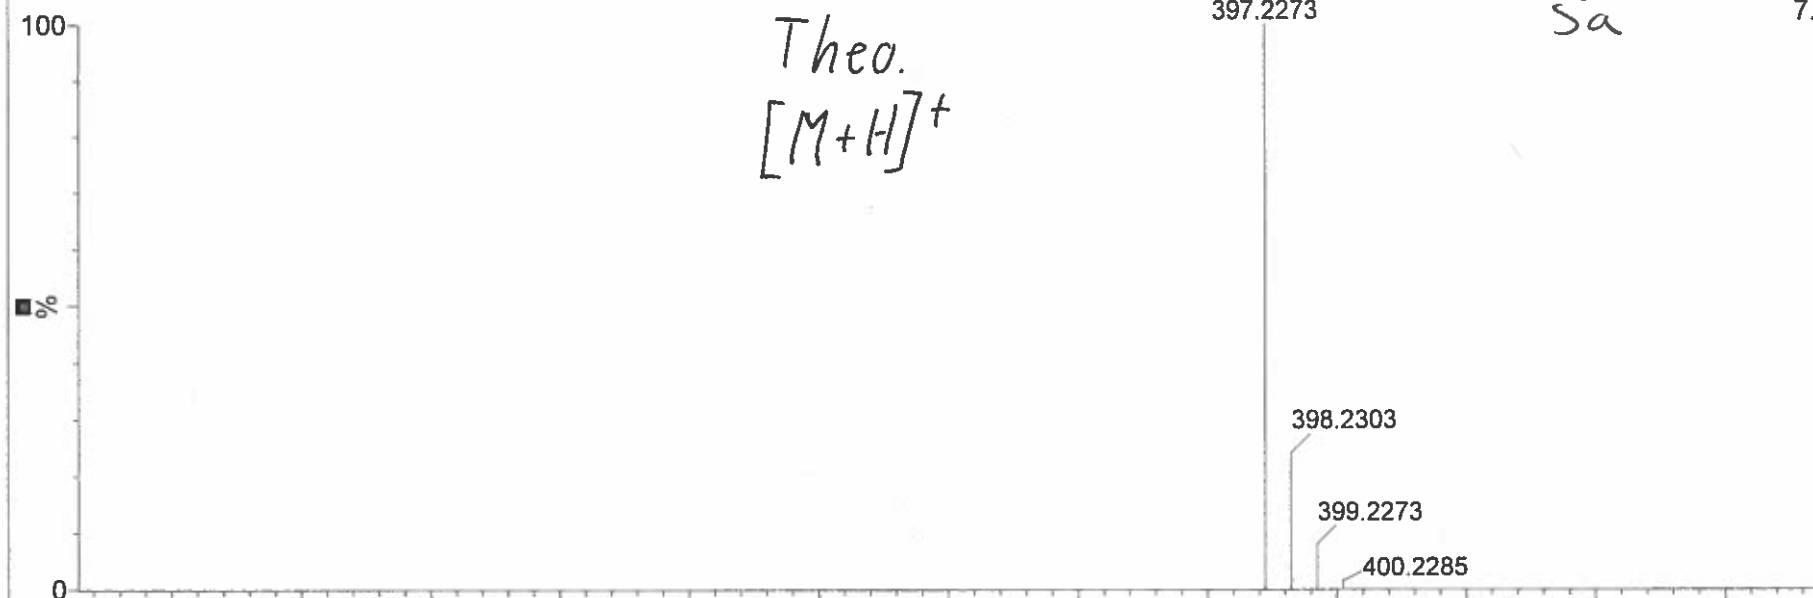

01ERS-61\_08 11 (0.202) AM (Cen,4, 80.00, Ar,1000.0,393.21,1.00); Sm (SG, 2x3.00); Cm (9:11)

TOF MS ES+  
3.61e4

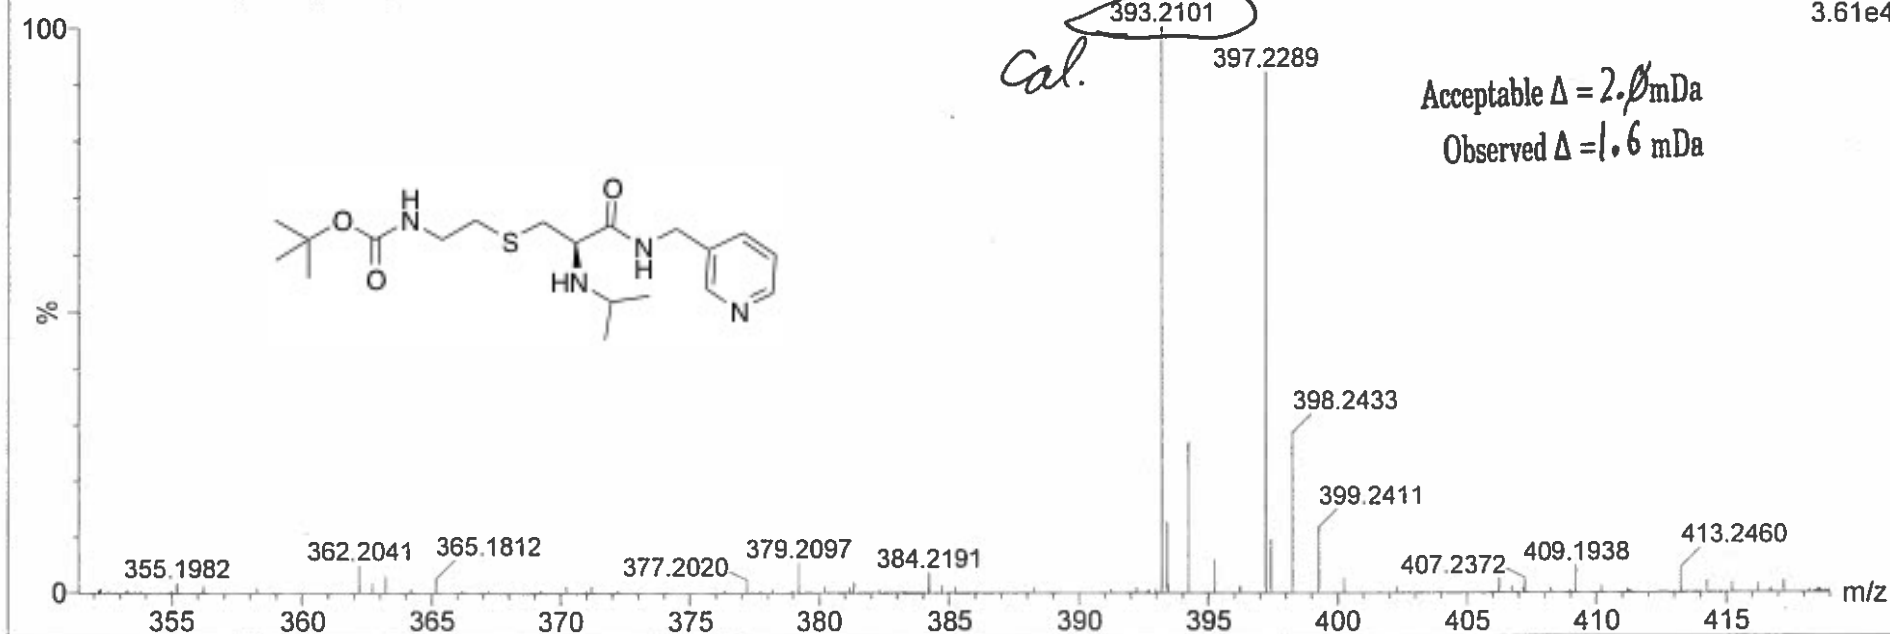

01ERS-58\_03 (0.019) Is (1.00,0.01) C<sub>21</sub>H<sub>34</sub>N<sub>4</sub>O<sub>3</sub>SH

56

TOF MS ES+  
7.33e12

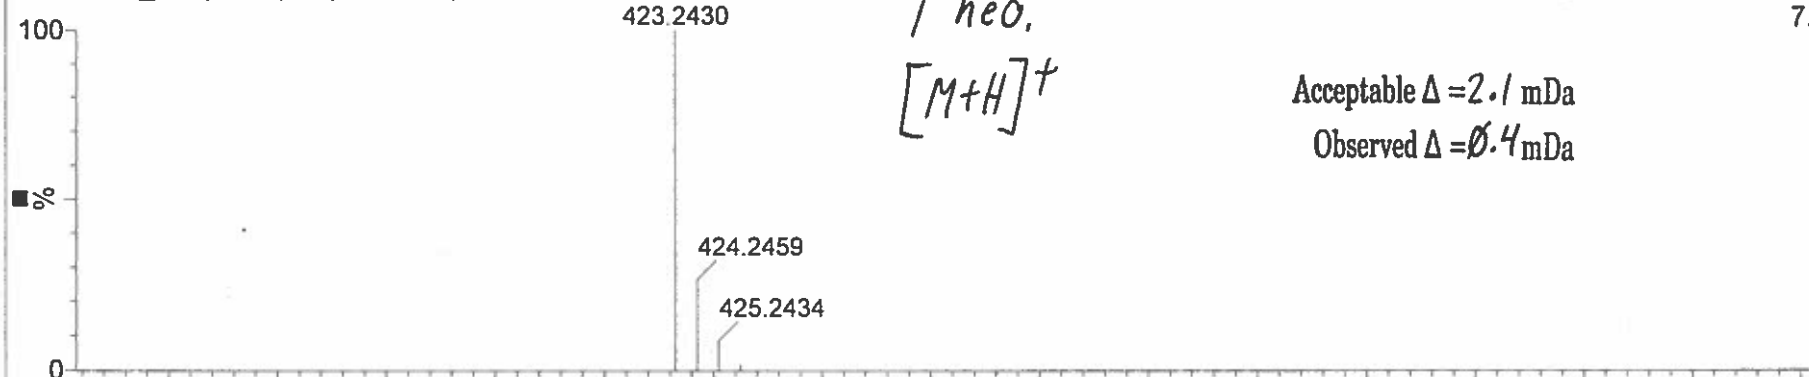

Theo.  
[M+H]<sup>+</sup>

Acceptable  $\Delta = 2.1$  mDa  
Observed  $\Delta = 0.4$  mDa

01ERS-58\_03 (0.019) Is (1.00,0.01) C<sub>21</sub>H<sub>34</sub>N<sub>4</sub>O<sub>3</sub>SNa

TOF MS ES+  
7.33e12

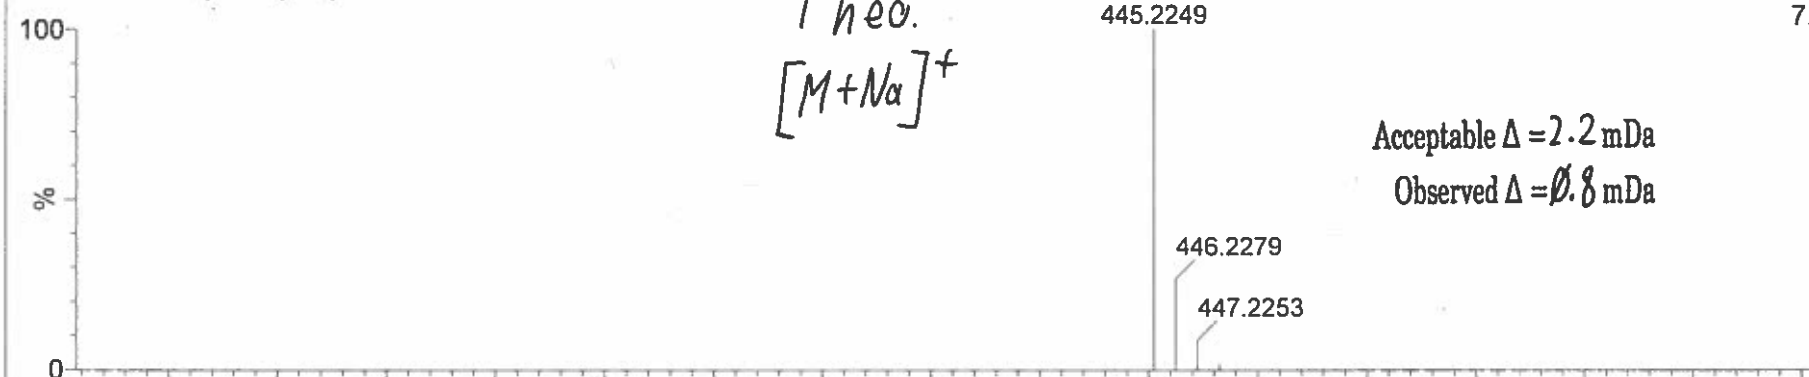

Theo.  
[M+Na]<sup>+</sup>

Acceptable  $\Delta = 2.2$  mDa  
Observed  $\Delta = 0.8$  mDa

01ERS-58\_03 45 (0.825) AM (Cen,4, 80.00, Ar,1000.0,437.24,1.00); Sm (SG, 2x3.00); Cm (36:49)

TOF MS ES+  
1.42e4

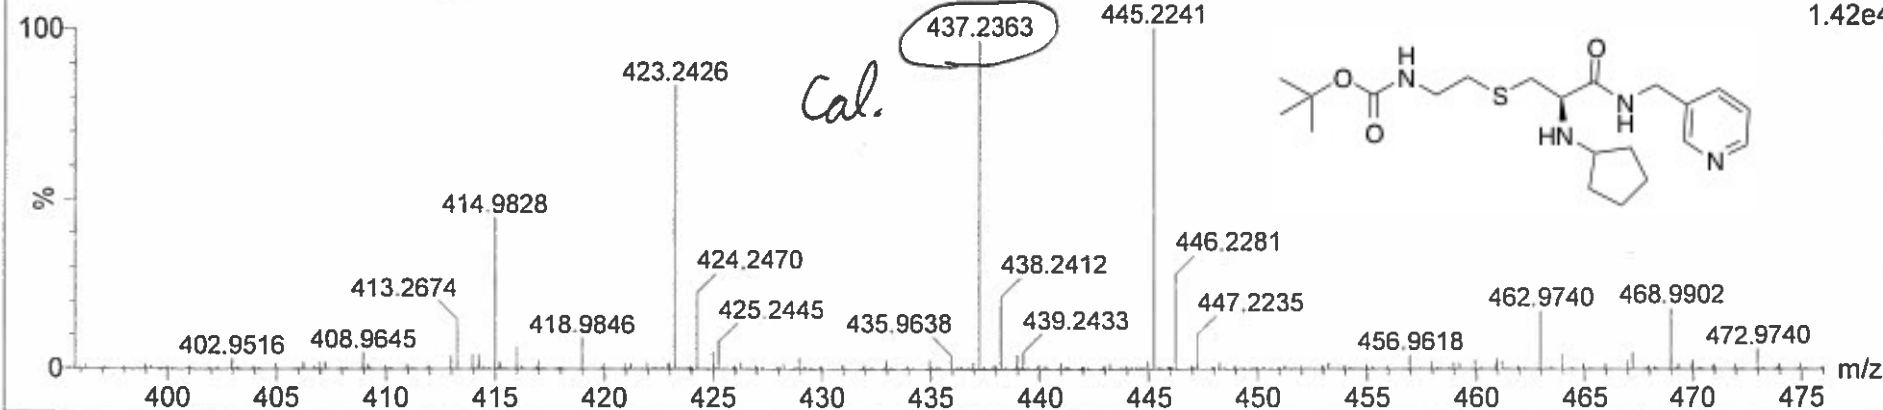

Cal.

437.2363

01ERS-80\_06 (0.019) Is (1.00,0.01) C22H30N4O3SNa

TOF MS ES+  
7.26e12

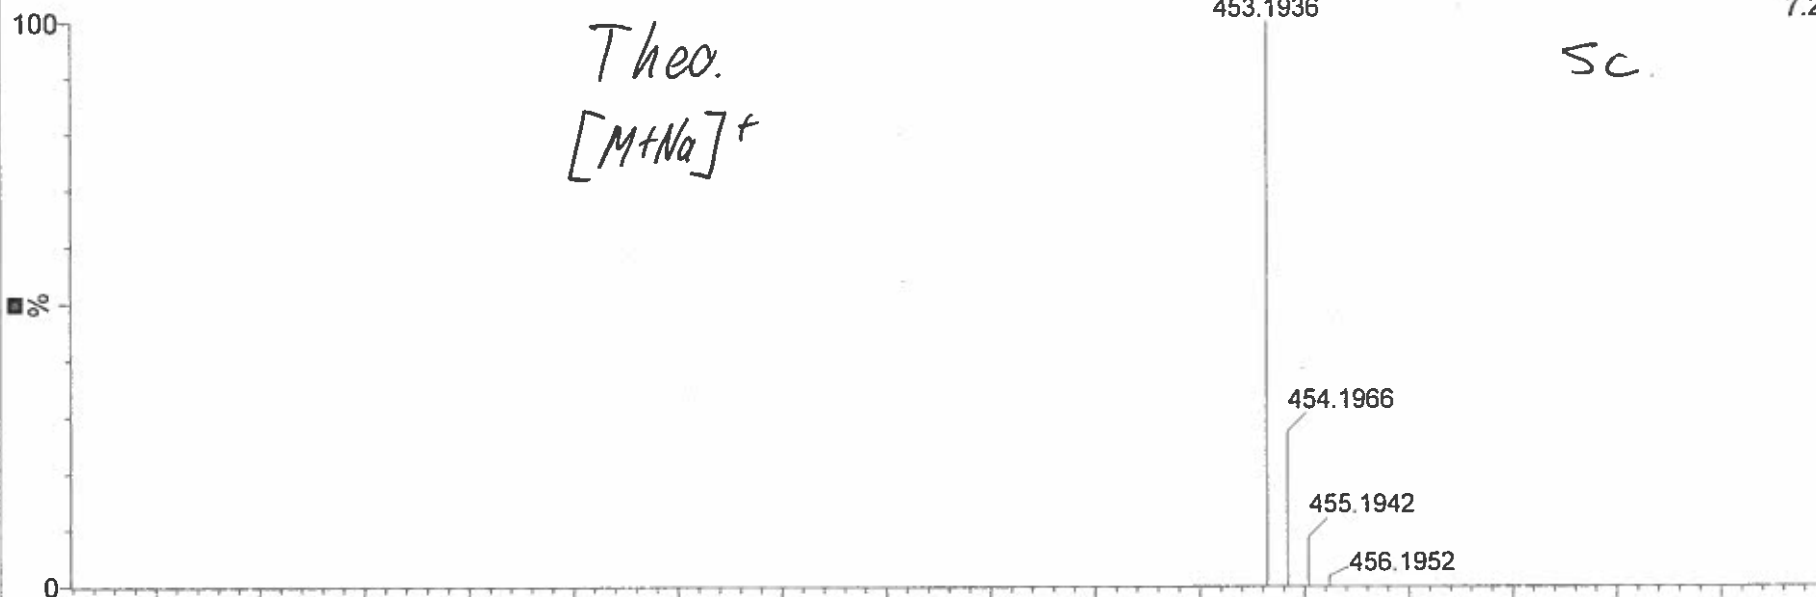

01ERS-80\_06 24 (0.440) AM (Cen,4, 80.00, Ar,1000.0,437.24,1.00); Sm (SG, 2x3.00); Cm (24:26)

TOF MS ES+  
4.77e3

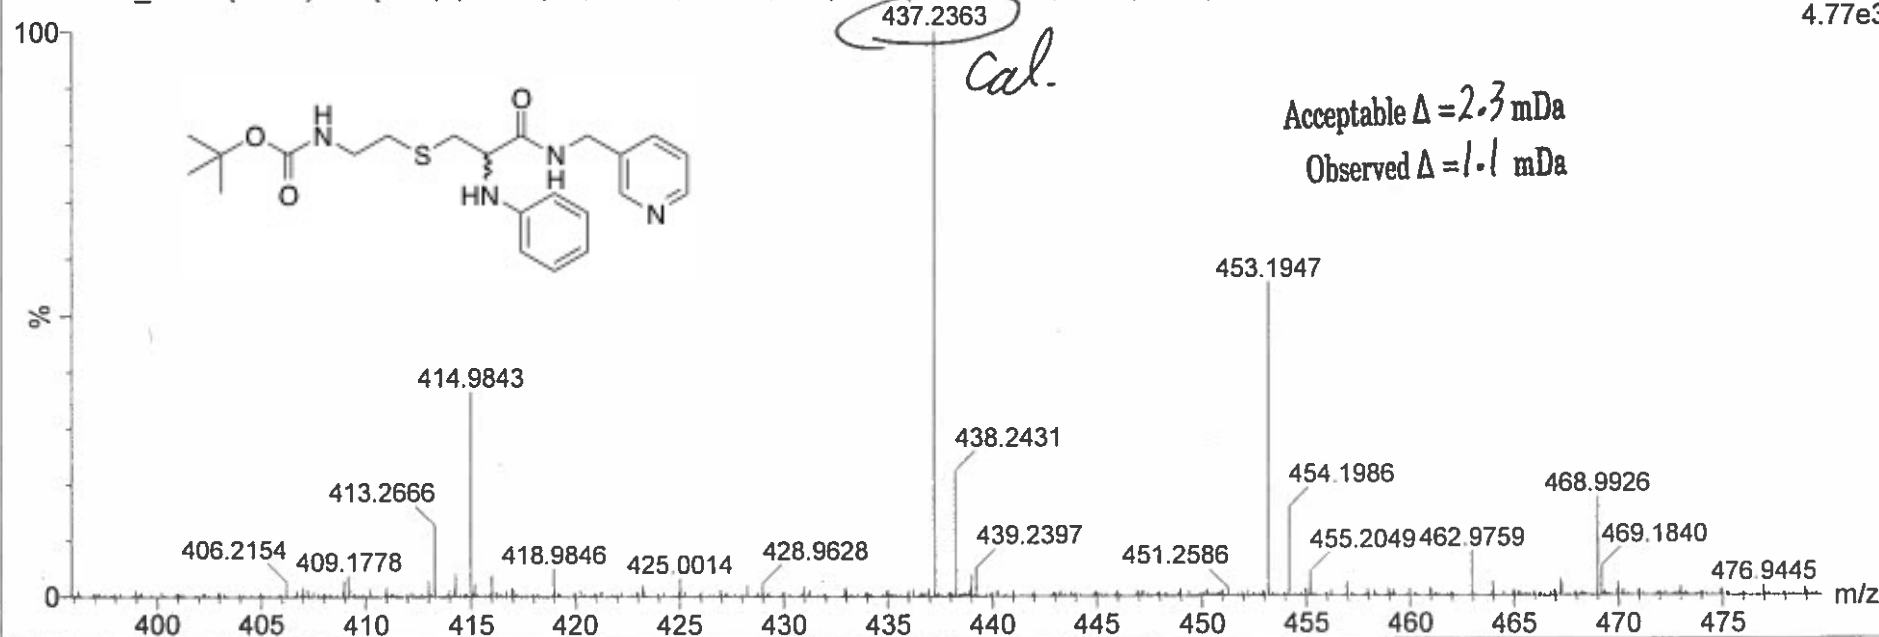

01ERS-49\_04 (0.019) Is (1.00,0.01) C<sub>21</sub>H<sub>27</sub>NO<sub>5</sub>Na

*Thee.*  
 $[M+Na]^+$

*6a*

TOF MS ES+  
7.39e12

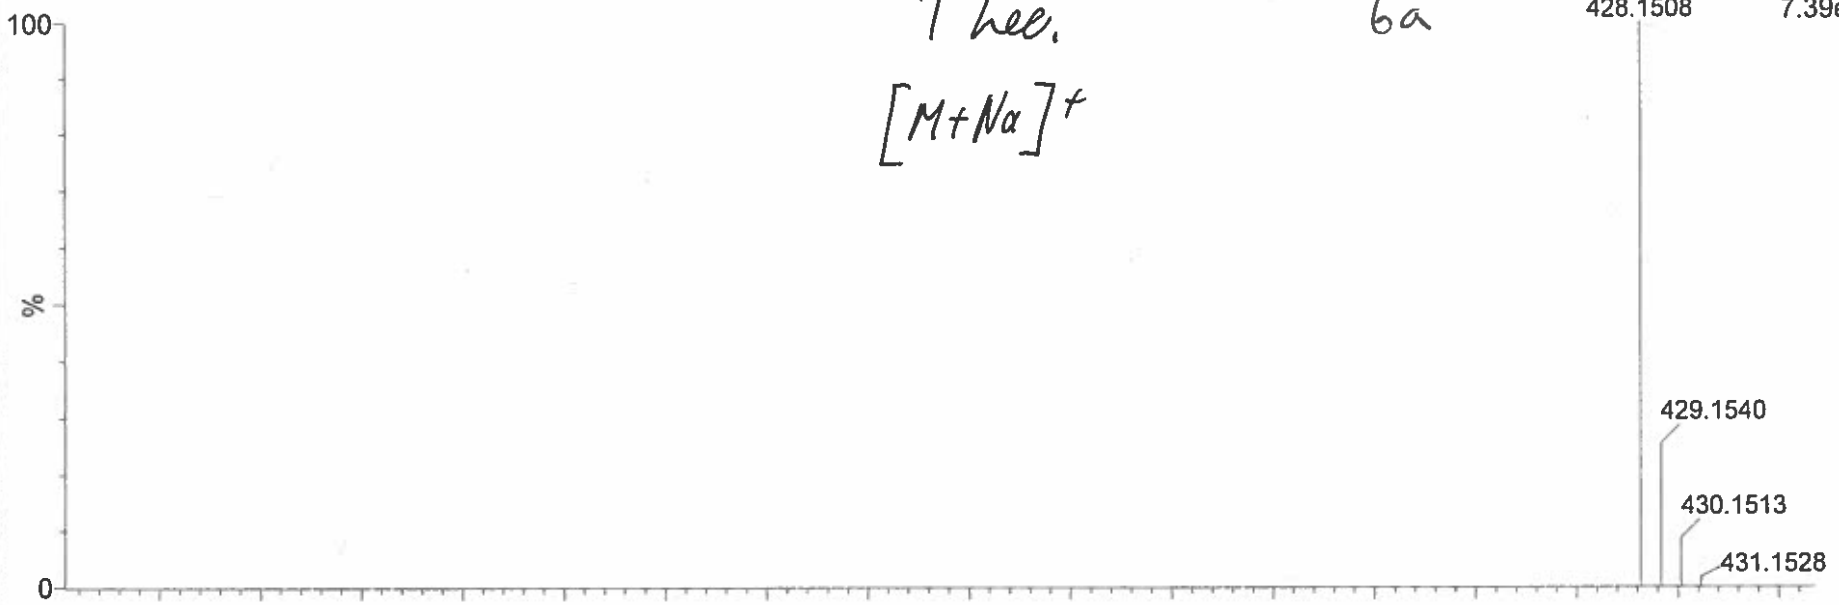

01ERS-49\_04 19 (0.348) AM (Cen,4, 80.00, Ar,1000.0,393.21,1.00); Sm (SG, 2x3.00); Cm (19:30)

TOF MS ES+  
4.68e4

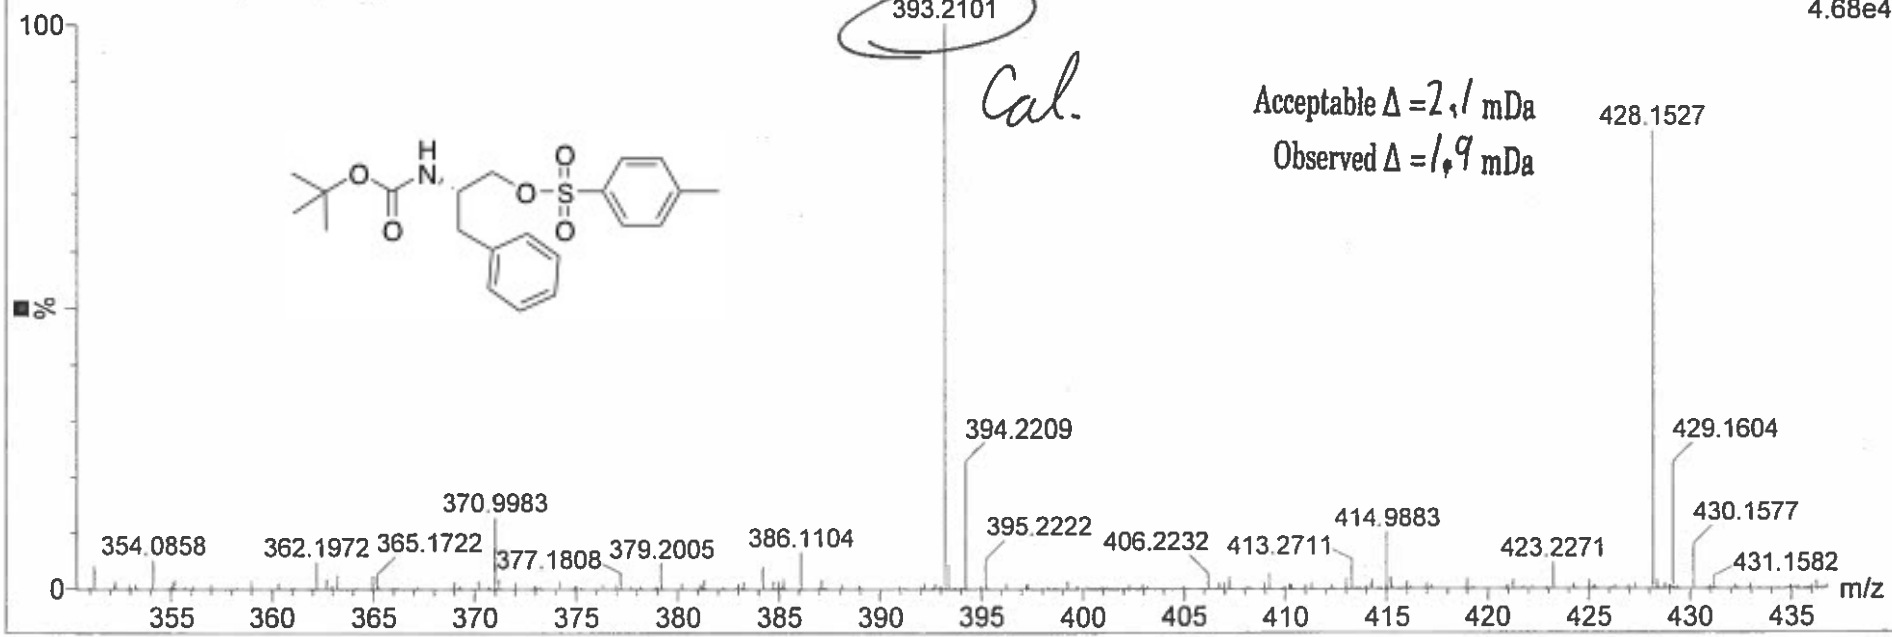

01ERS-65\_08 (0.019) Is (1.00,0.01) C<sub>23</sub>H<sub>28</sub>N<sub>2</sub>O<sub>5</sub>Na

TOF MS ES+  
7.20e12

66

Theo.  
[M+Na]<sup>+</sup>

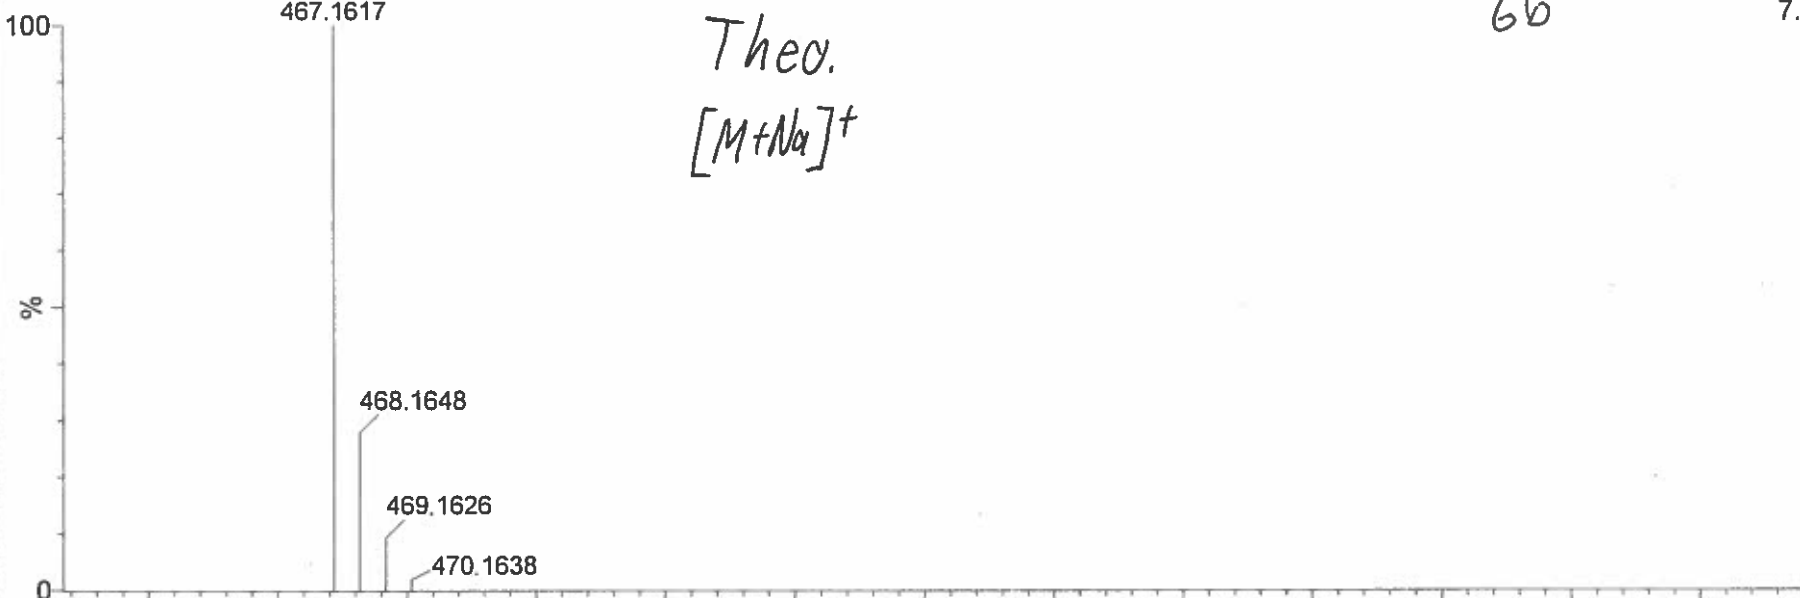

01ERS-65\_08 23 (0.422) AM (Cen,4, 80.00, Ar,1000.0,481.26,1.00); Sm (SG, 2x3.00); Cm (23:30)

TOF MS ES+  
2.33e4

Acceptable  $\Delta = 2.3$  mDa  
Observed  $\Delta = 1.6$  mDa

481.2625 Cal.

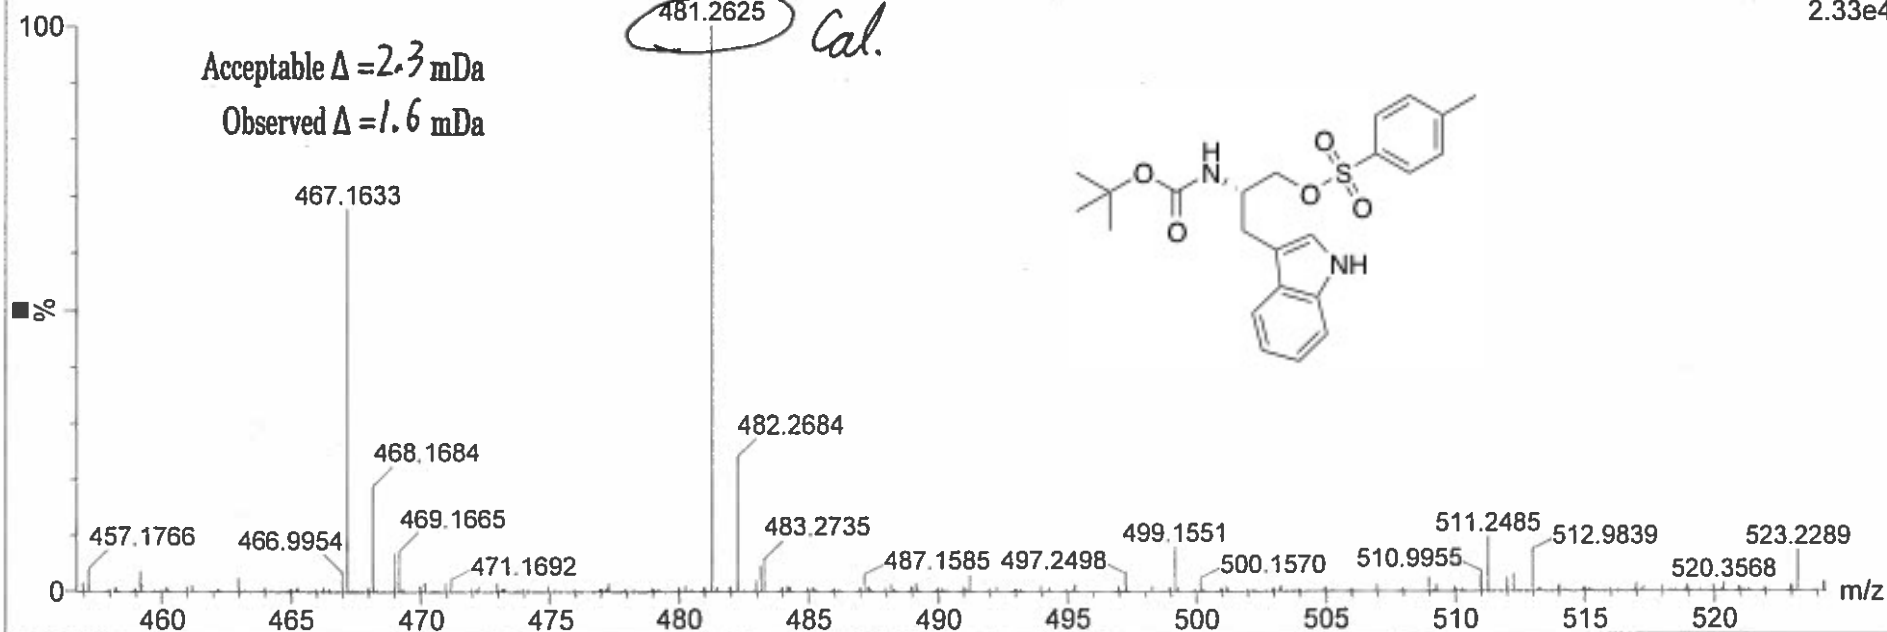

01ERS-41\_05 (0.019) Is (1.00,0.01) C<sub>20</sub>H<sub>32</sub>N<sub>2</sub>O<sub>4</sub>Na

TOF MS ES+  
7.45e12

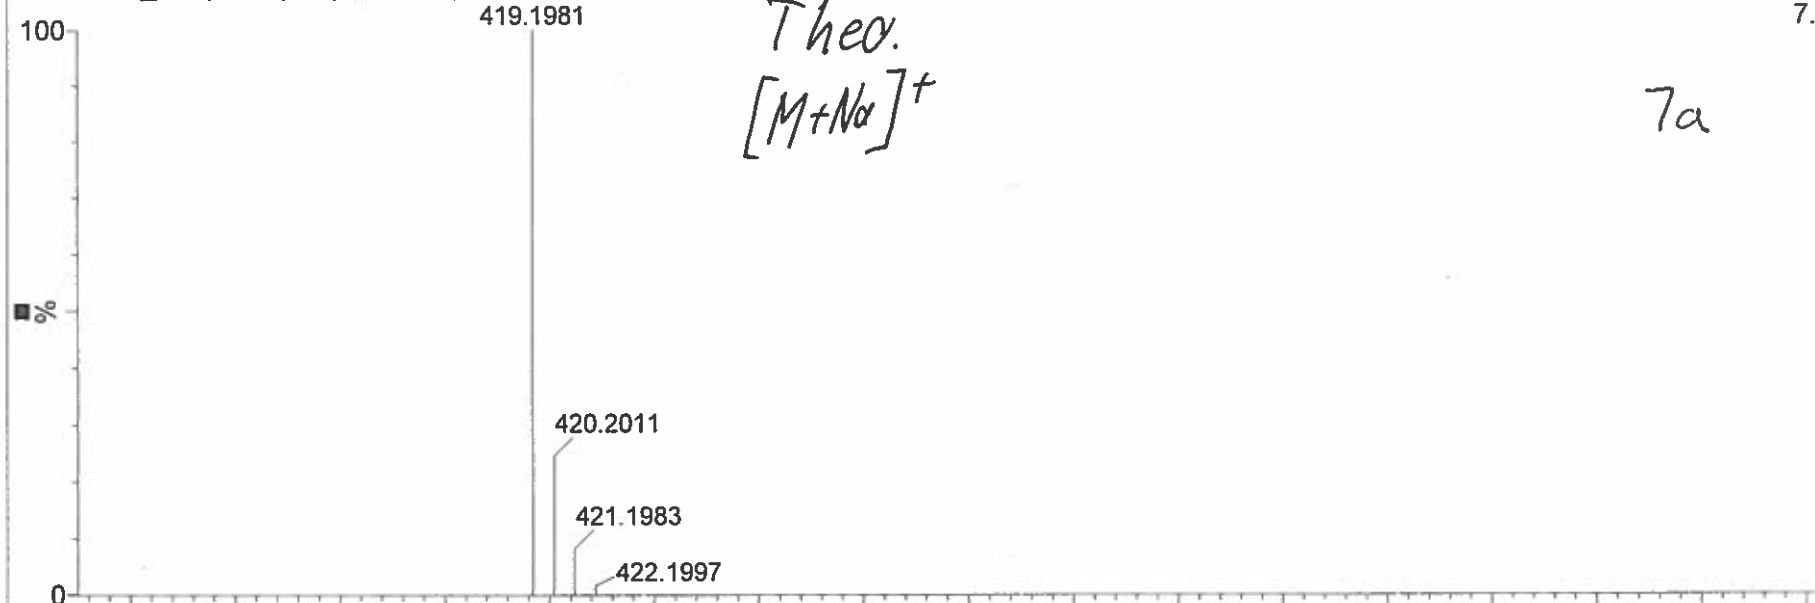

01ERS-41\_05 13 (0.238) AM (Cen,4, 80.00, Ar,1000.0,437.24,1.00); Sm (SG, 2x3.00); Cm (8:13)

TOF MS ES+  
6.50e4

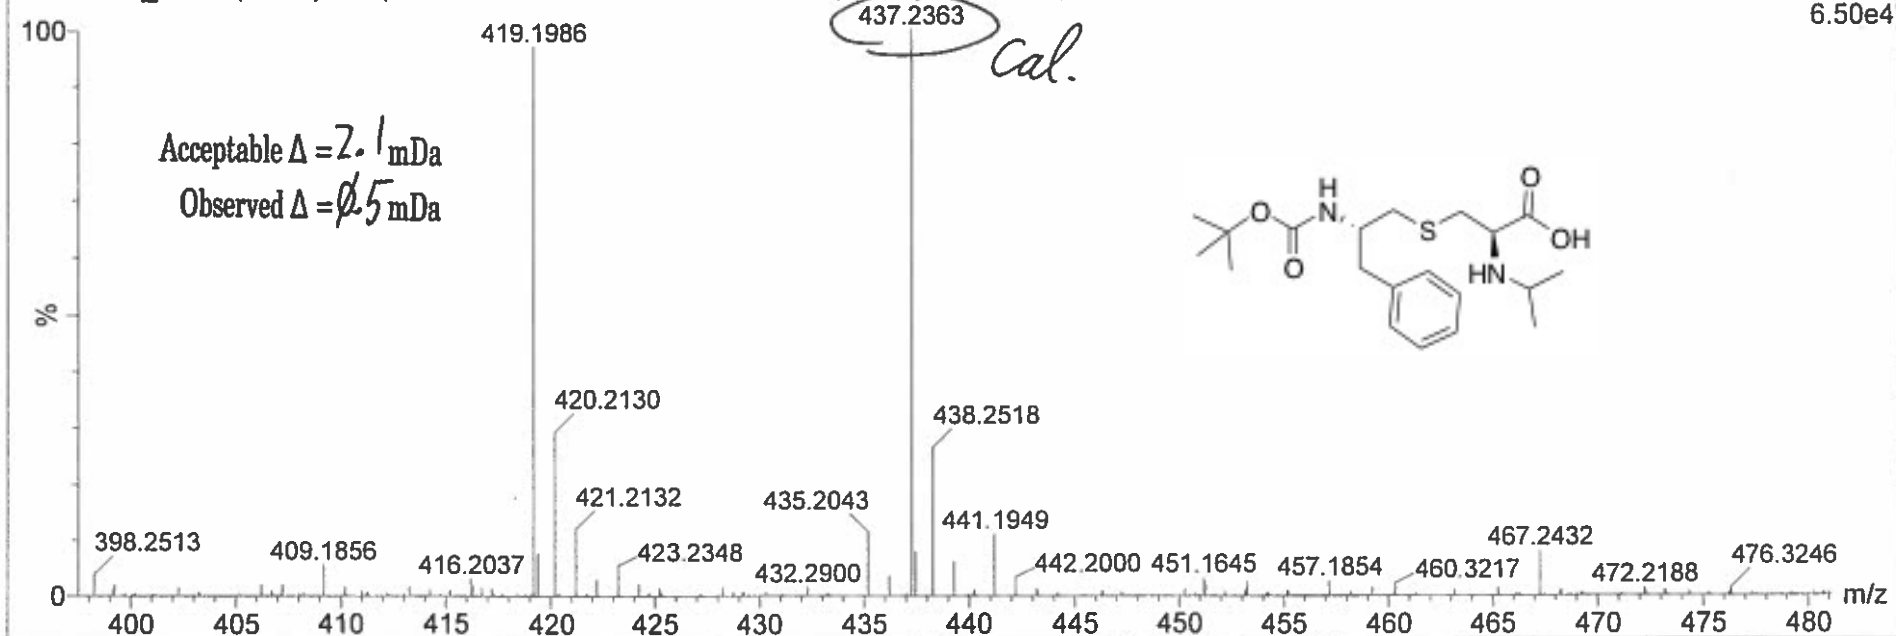

01ERS-36\_06 (0.019) Is (1.00,0.01) C<sub>22</sub>H<sub>34</sub>N<sub>2</sub>O<sub>4</sub>Na

TOF MS ES+  
7.29e12

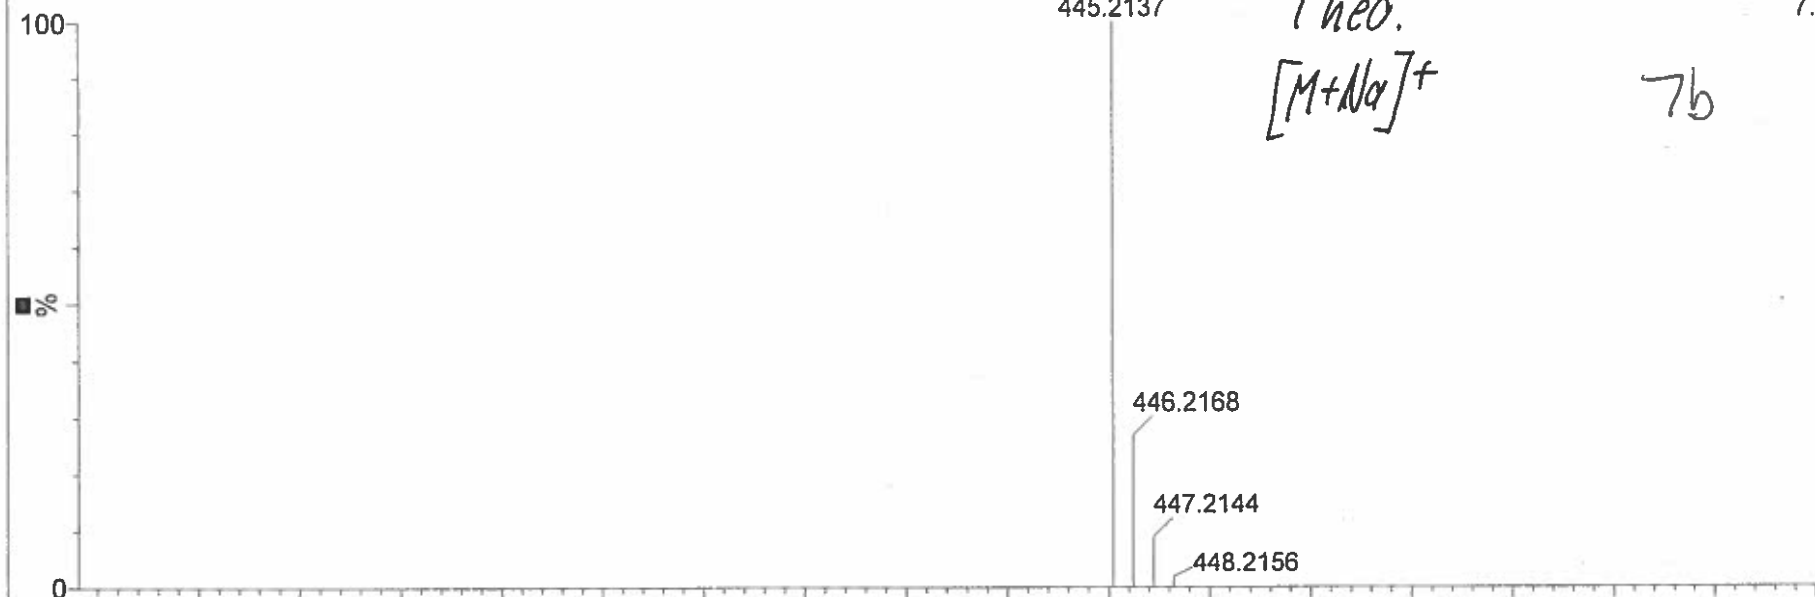

01ERS-36\_06 20 (0.367) AM (Cen,4, 80.00, Ar,1000.0,437.24,1.00); Sm (SG, 2x3.00); Cm (20:29)

TOF MS ES+  
4.02e4

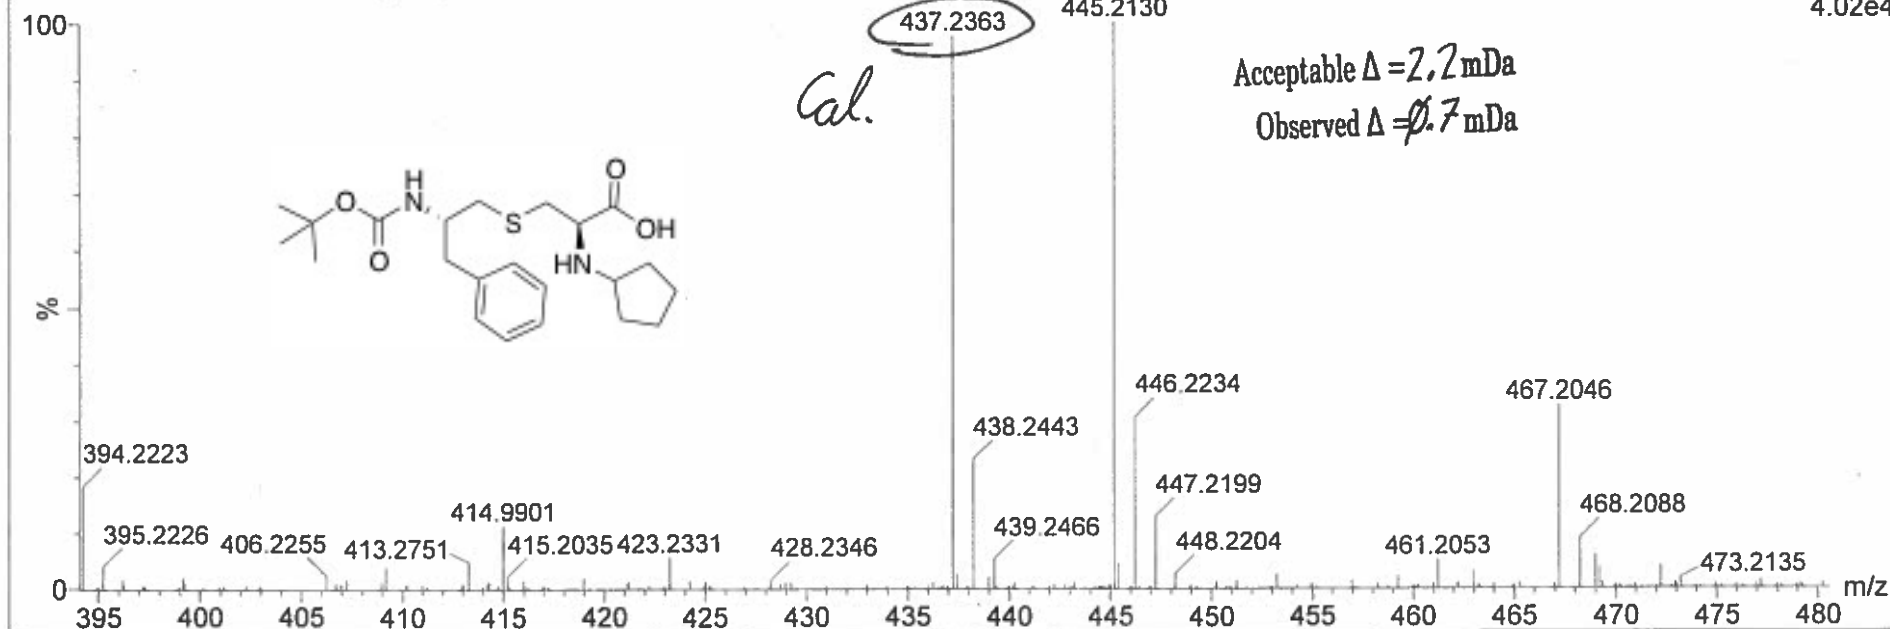

01ERJ-75+HCl\_04 (0.019) Is (1.00,0.01) C23H30N2O4SH

TOF MS ES+  
7.21e12

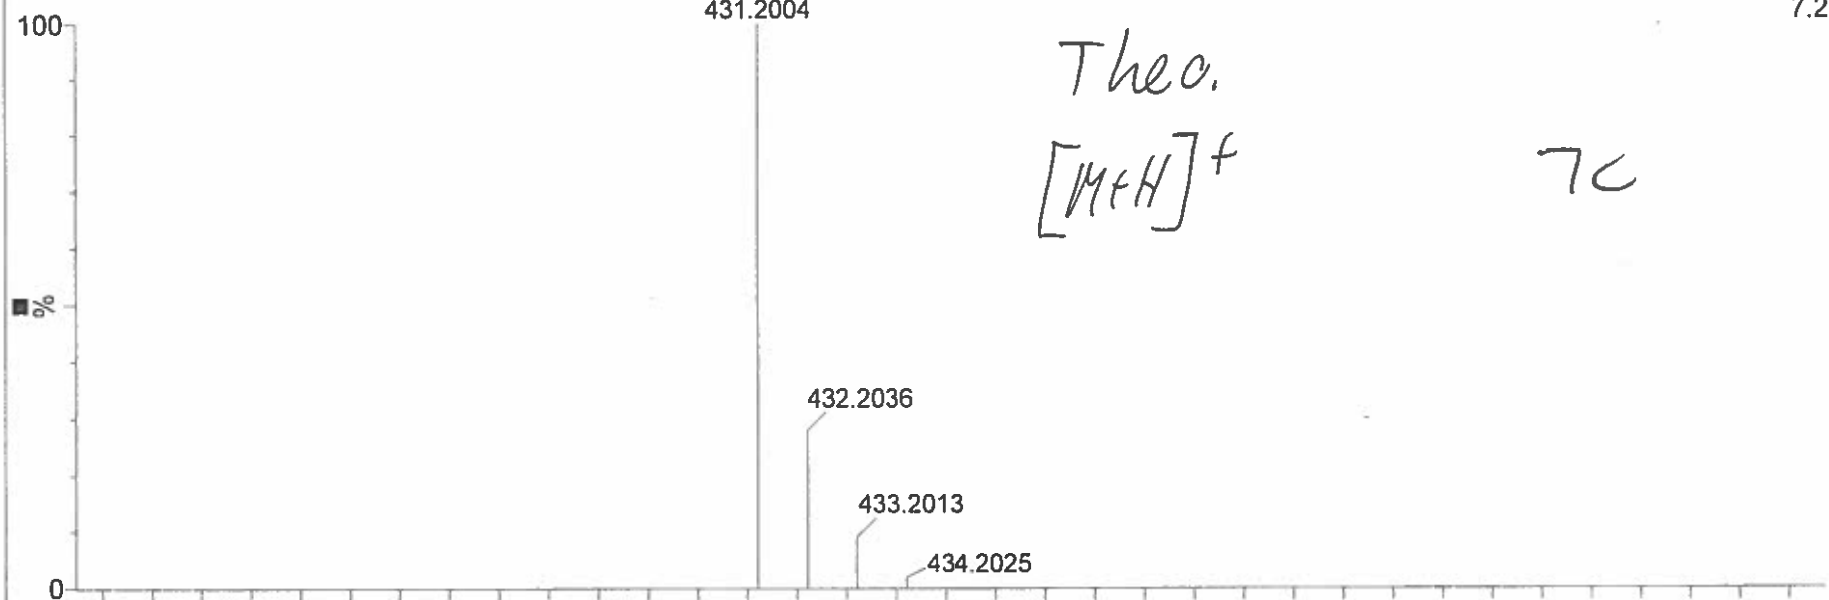

01ERJ-75+HCl\_04 21 (0.385) AM (Cen,4, 80.00, Ar,1000.0,437.24,1.00); Sm (SG, 2x3.00); Cm (21:24)

TOF MS ES+  
3.22e4

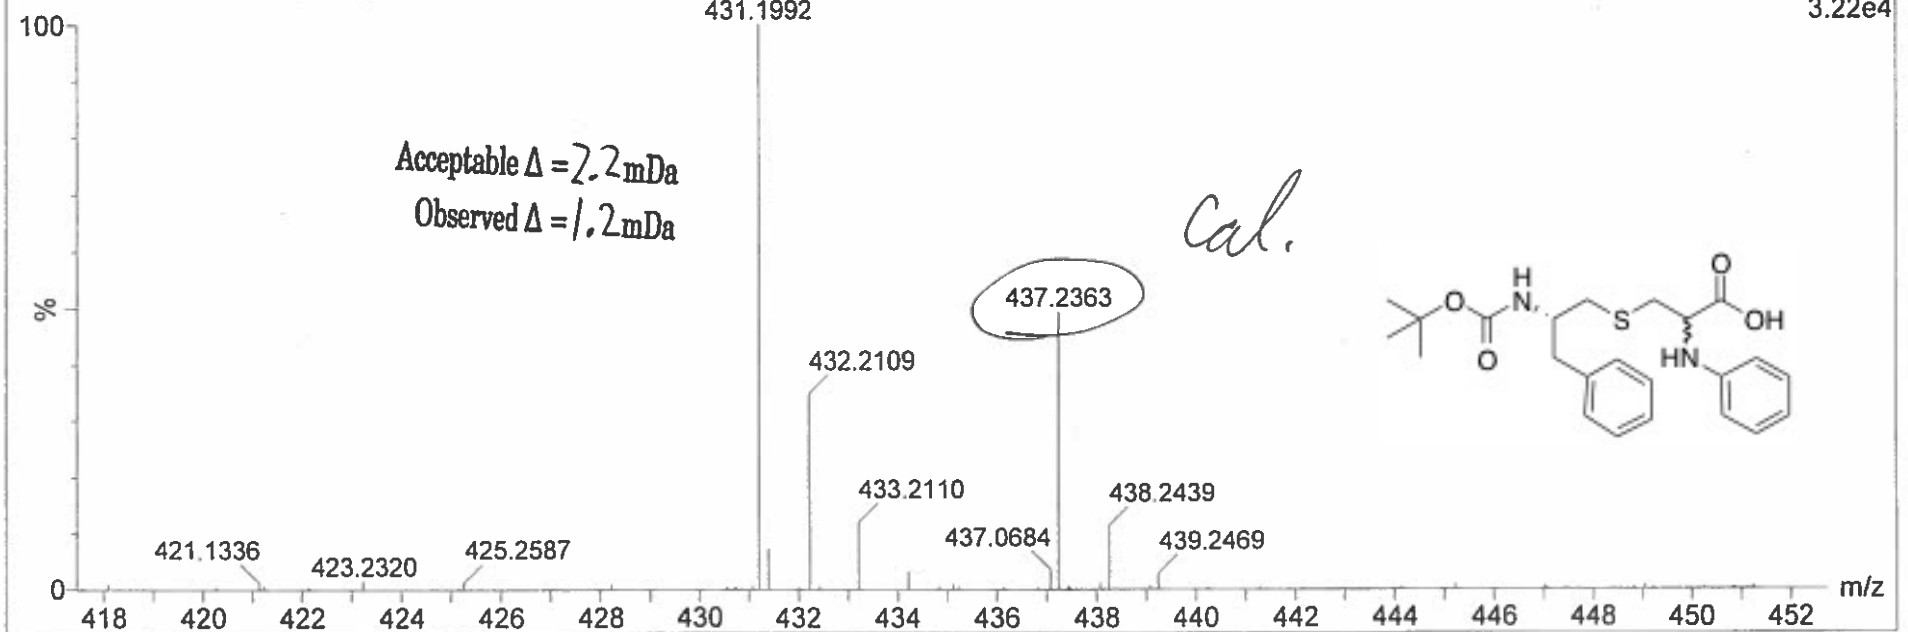



01ERS-69\_04 (0.019) Is (1.00,0.01) C<sub>22</sub>H<sub>33</sub>N<sub>3</sub>O<sub>4</sub>Na

TOF MS ES+  
7.26e12

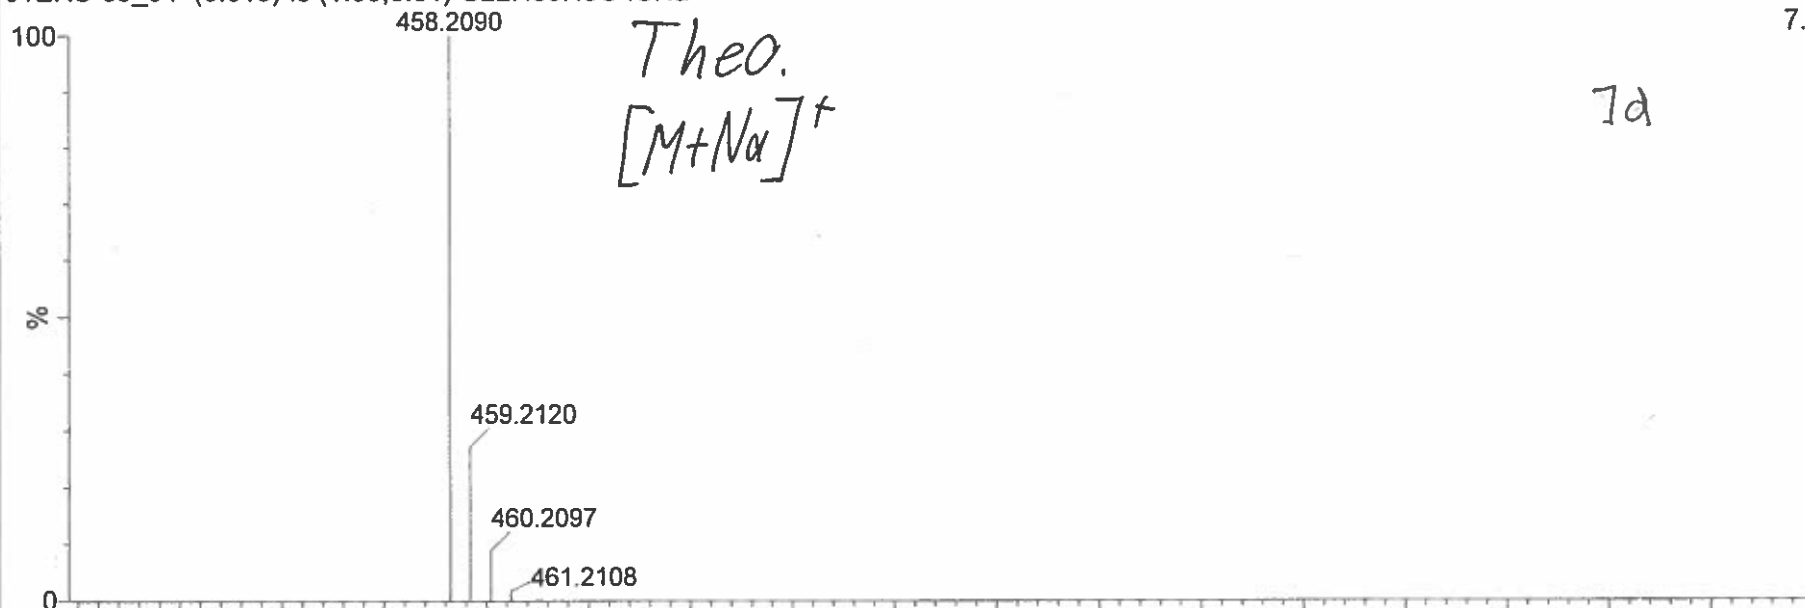

01ERS-69\_04 31 (0.568) AM (Cen,4, 80.00, Ar,1000.0,481.26,1.00); Sm (SG, 2x3.00); Cm (31:55)

TOF MS ES+  
2.48e4

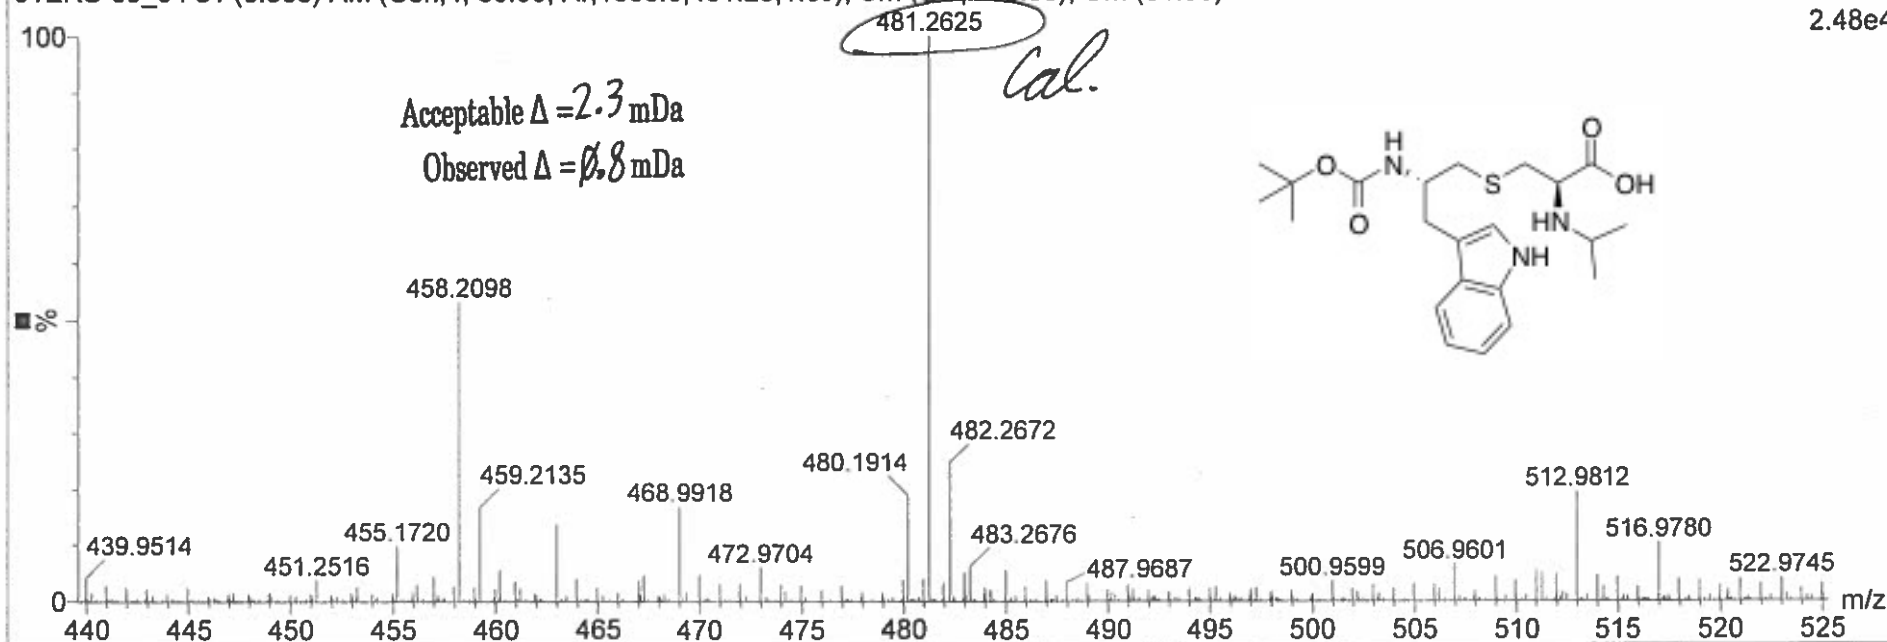

01ERS-66\_04 (0.019) Is (1.00,0.01) C<sub>24</sub>H<sub>35</sub>N<sub>3</sub>O<sub>4</sub>Na

TOF MS ES+  
7.10e12

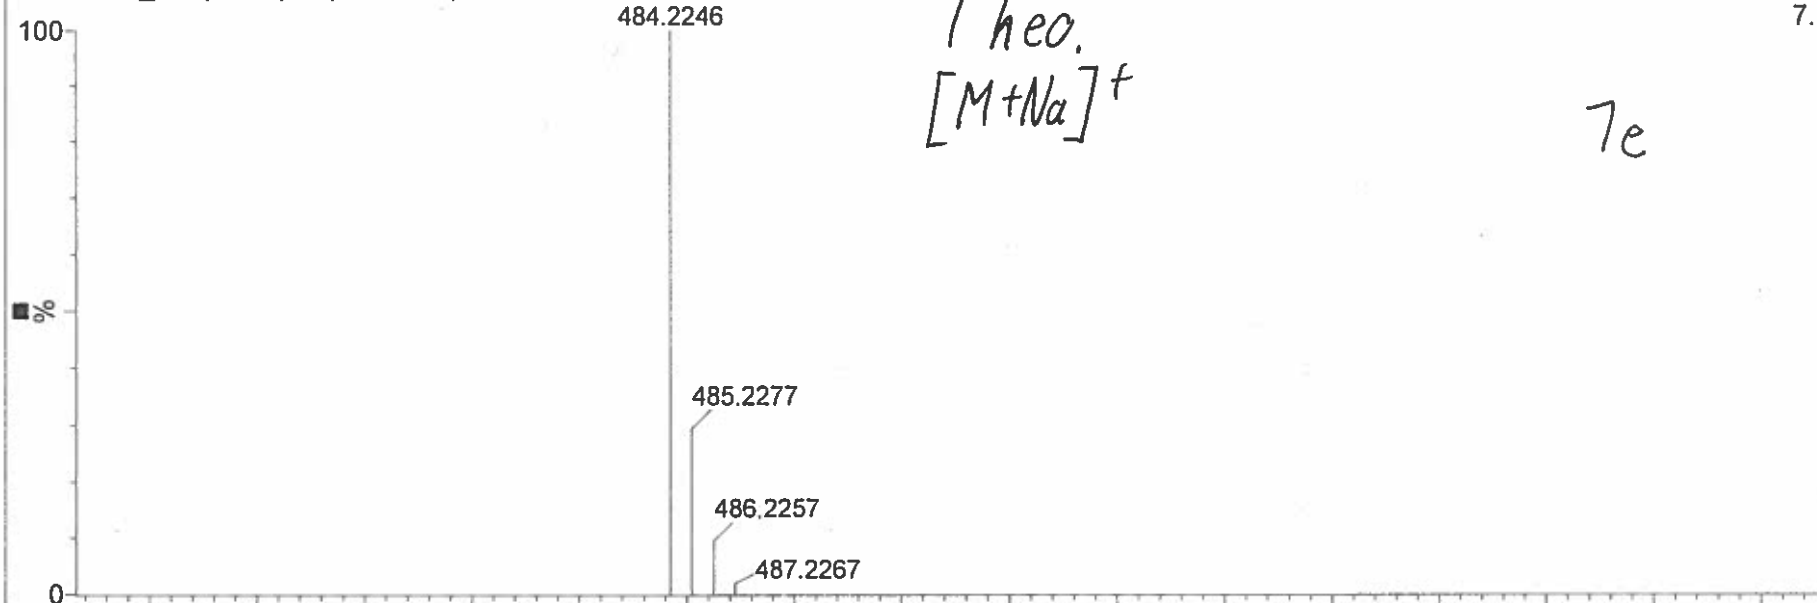

01ERS-66\_04 15 (0.275) AM (Cen,4, 80.00, Ar,1000.0,495.28,1.00); Sm (SG, 2x3.00); Cm (13:21)

TOF MS ES+  
1.32e5

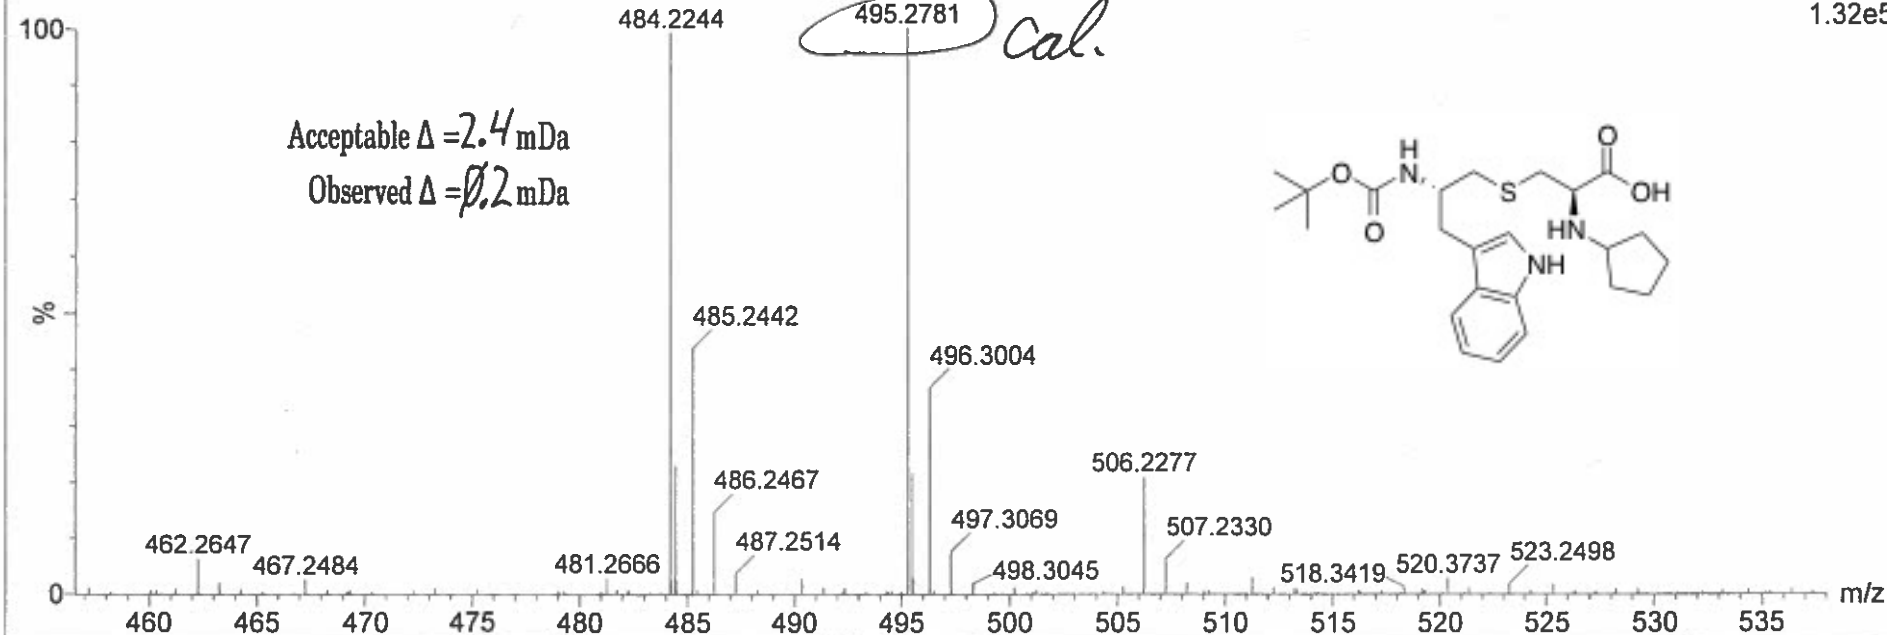

01ERJ-81+HCl\_06 (0.019) Is (1.00,0.01) C<sub>25</sub>H<sub>31</sub>N<sub>3</sub>O<sub>4</sub>SH

TOF MS ES+  
7.03e12

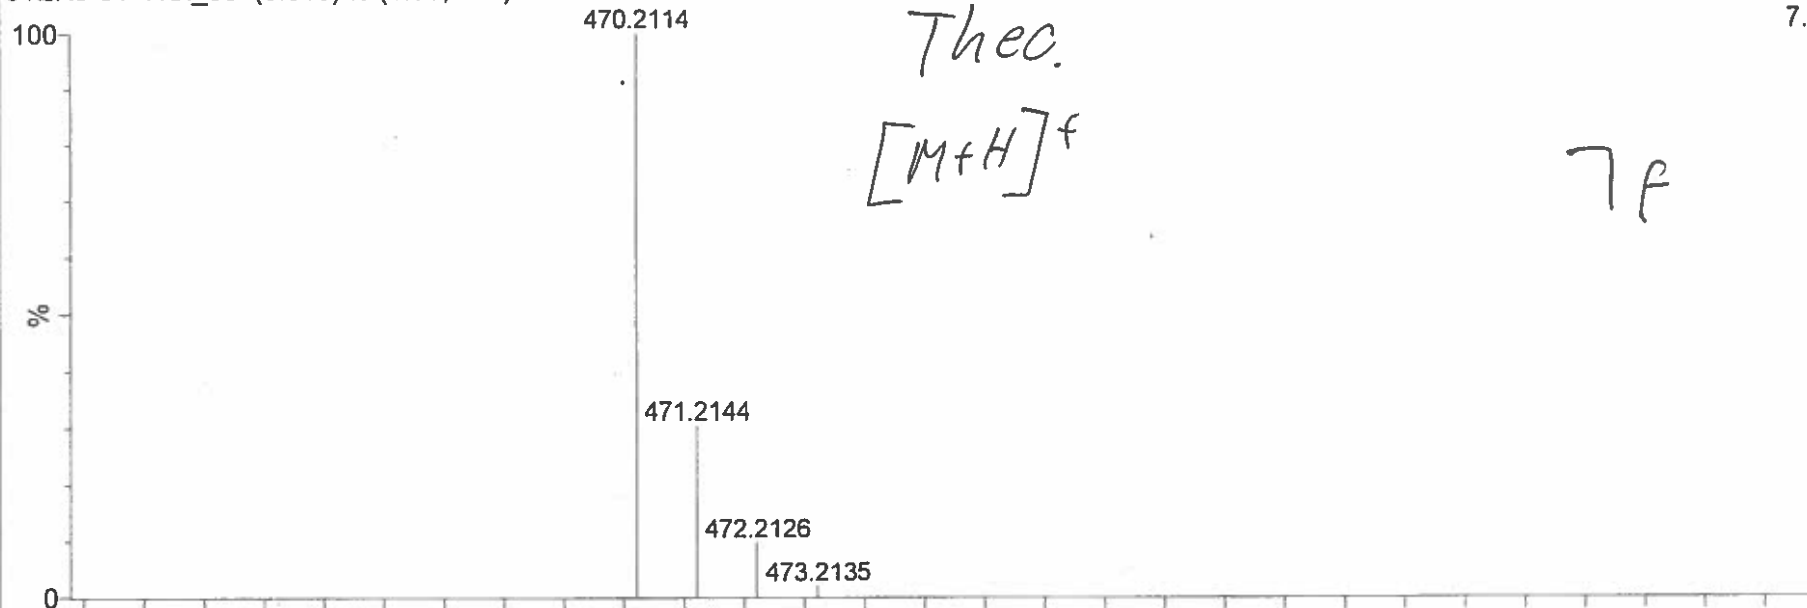

*Thec.*  
 $[M+H]^+$

7f

01ERJ-81+HCl\_06 23 (0.422) AM (Cen,4, 80.00, Ar,1000.0,481.26,1.00); Sm (SG, 2x3.00); Cm (23:29)

TOF MS ES+  
2.26e4

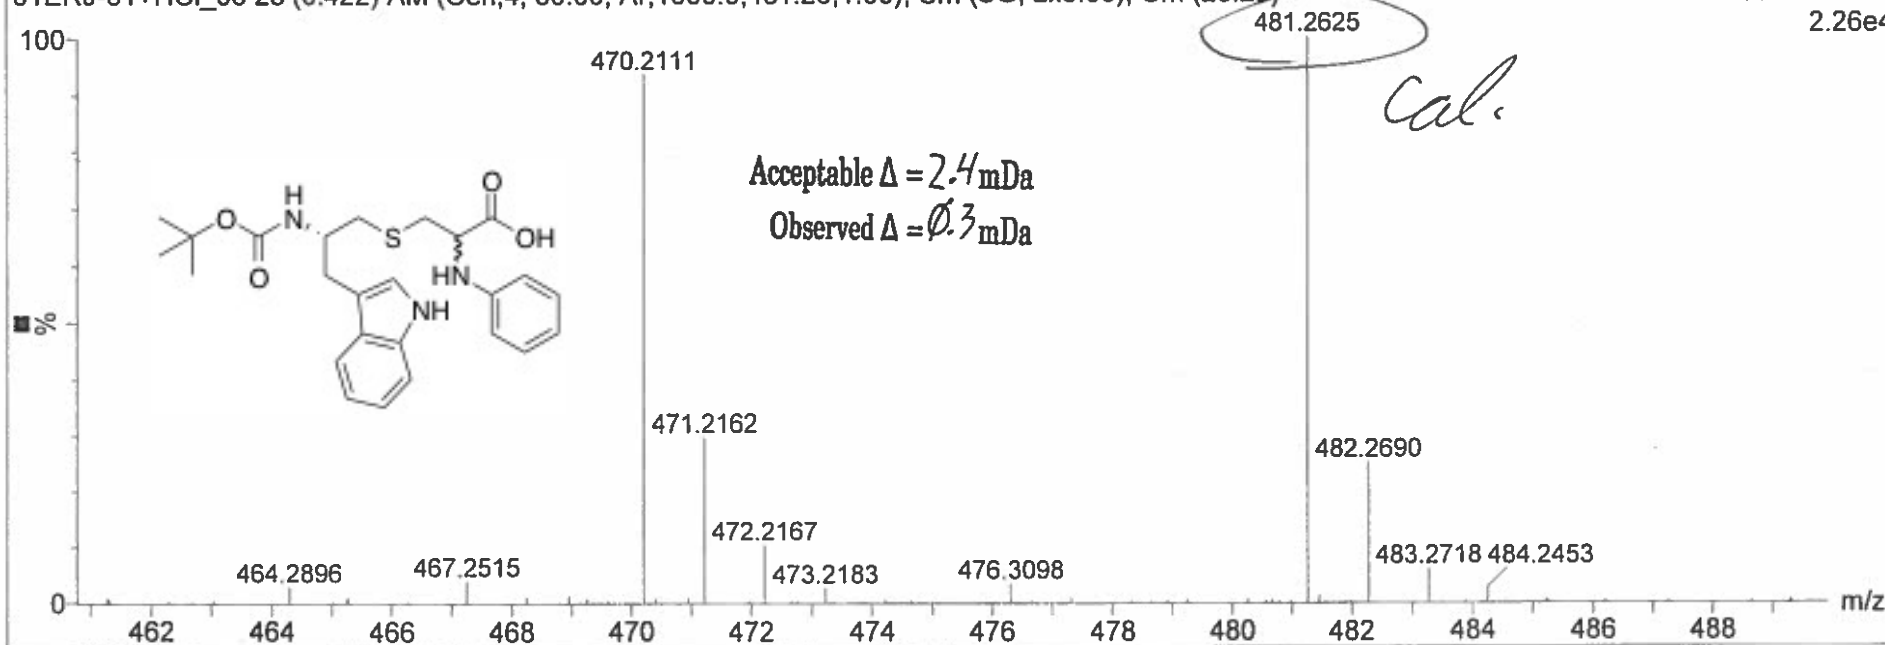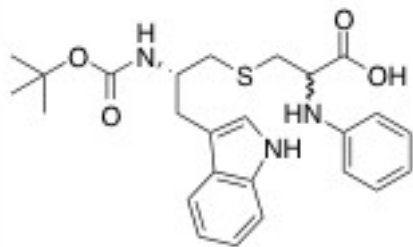

01ERS-43\_03 (0.019) Is (1.00,0.01) C<sub>26</sub>H<sub>38</sub>N<sub>4</sub>O<sub>3</sub>SH

8a

TOF MS ES+  
6.93e12

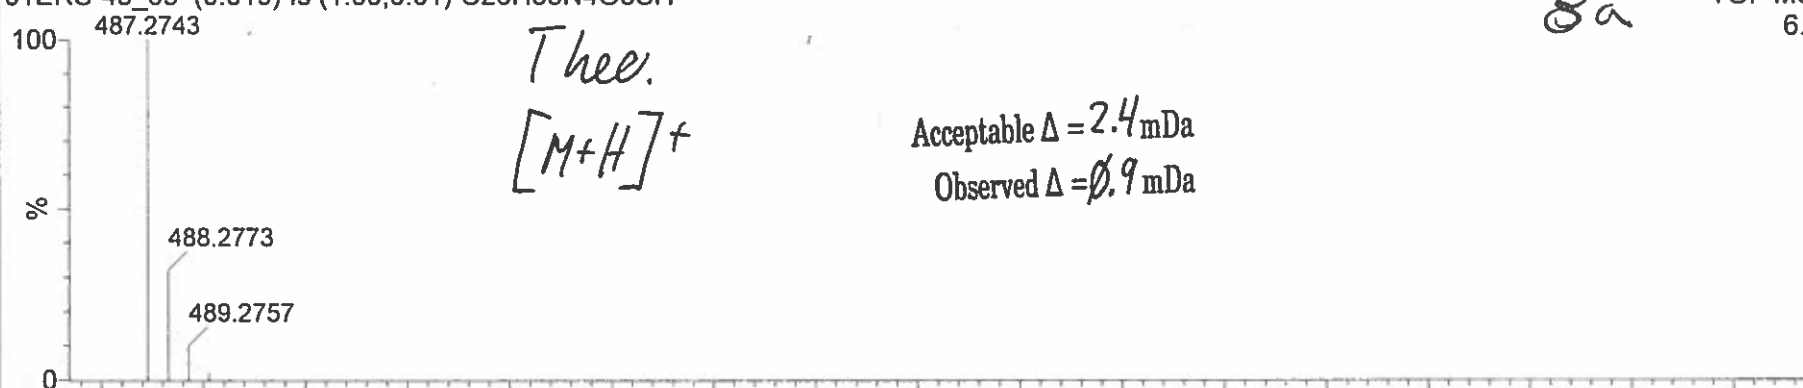

01ERS-43\_03 (0.019) Is (1.00,0.01) C<sub>26</sub>H<sub>38</sub>N<sub>4</sub>O<sub>3</sub>SNa

TOF MS ES+  
6.93e12

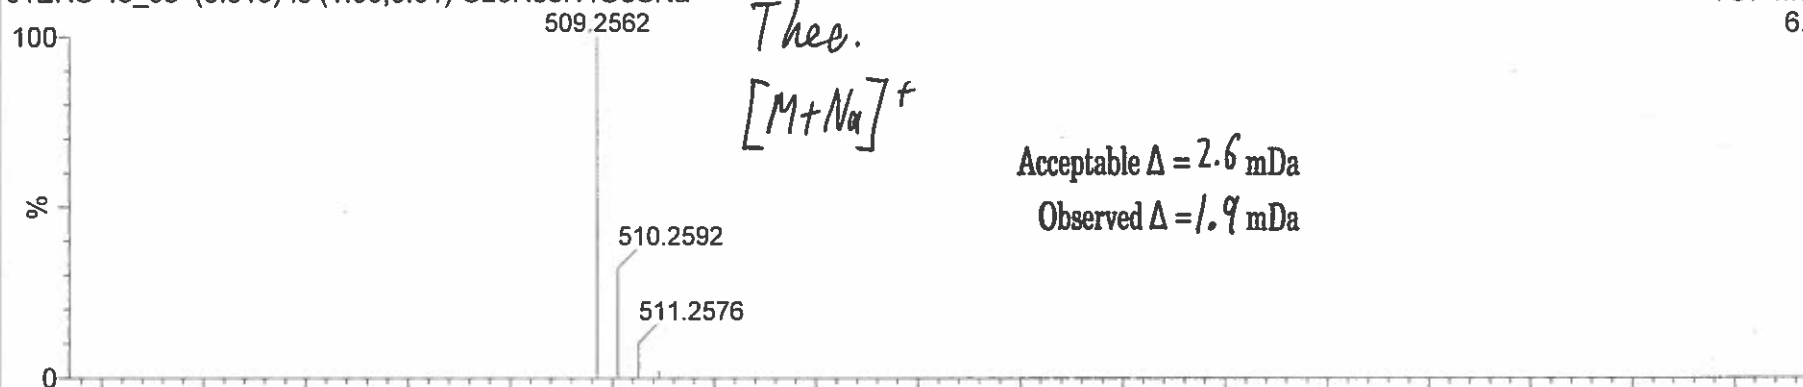

01ERS-43\_03 21 (0.385) AM (Cen,4, 80.00, Ar,1000.0,525.29,1.00); Sm (SG, 2x3.00); Cm (21:30)

TOF MS ES+  
2.78e4

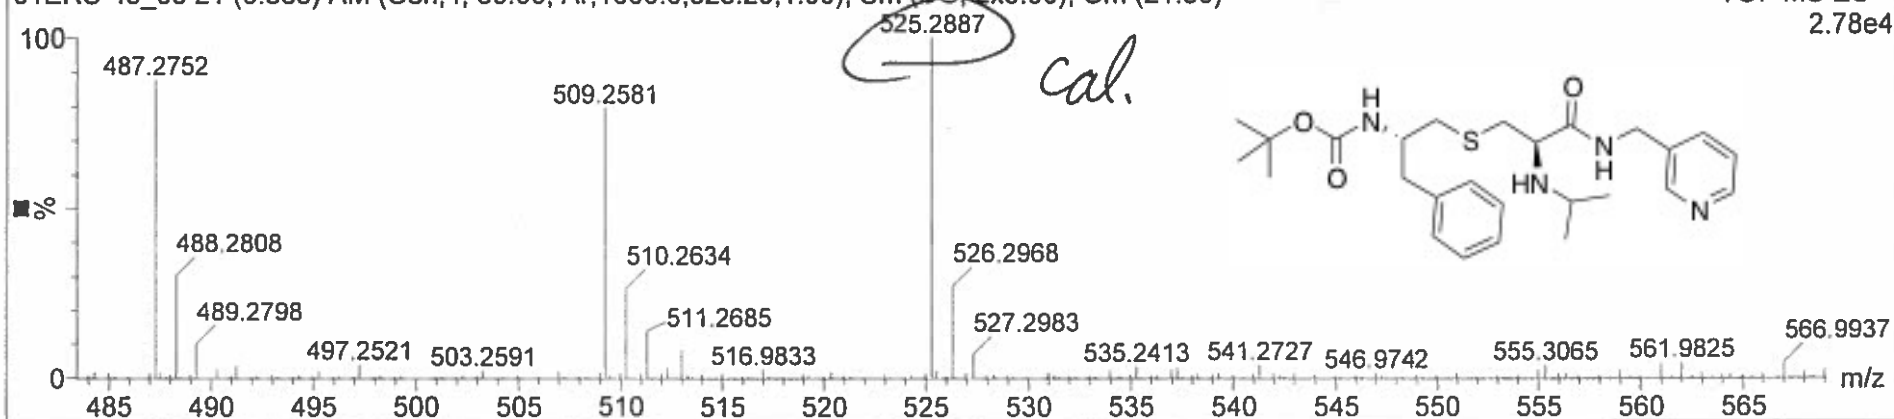

01ERS-38\_03 (0.019) Is (1.00,0.01) C<sub>28</sub>H<sub>40</sub>N<sub>4</sub>O<sub>3</sub>SH

8b

TOF MS ES+  
6.78e12

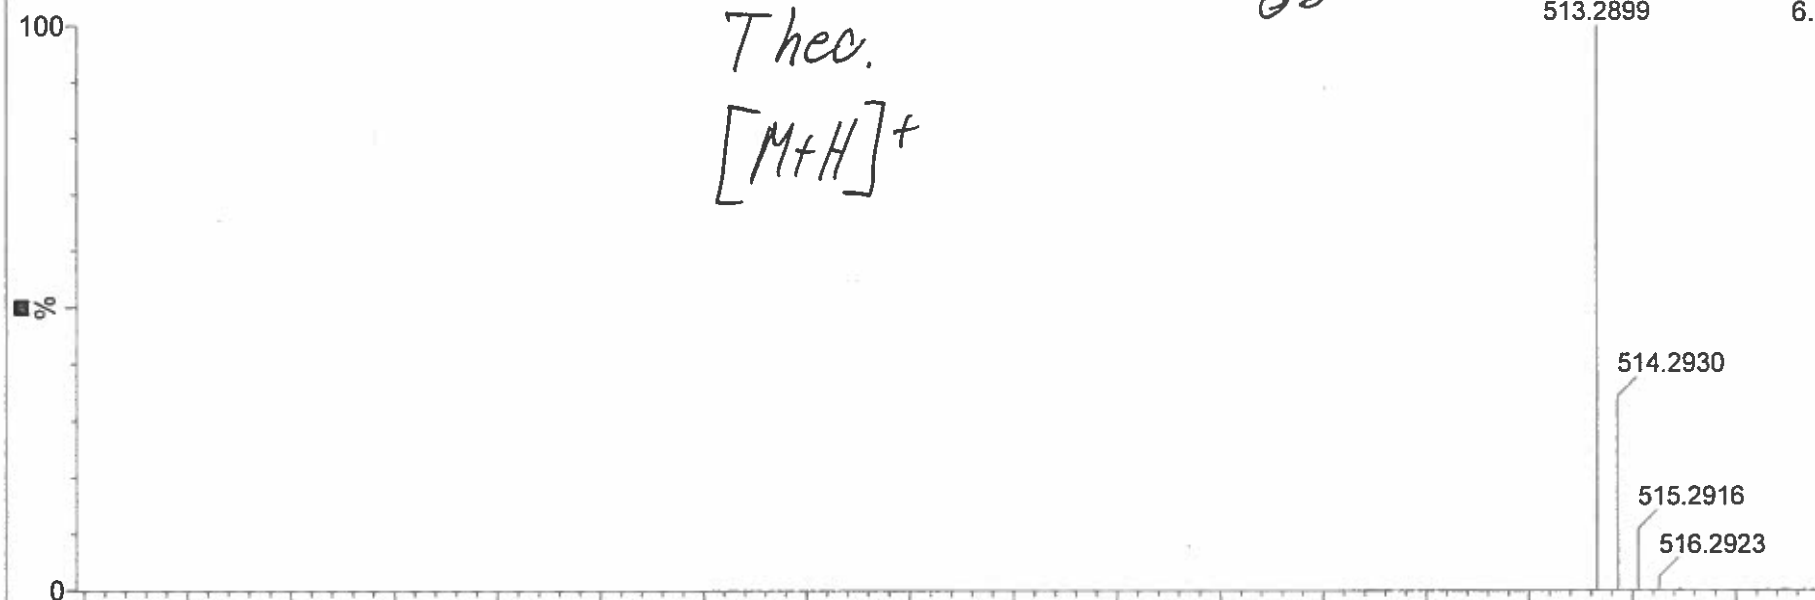

01ERS-38\_03 19 (0.348) AM (Cen,4, 80.00, Ar,1000.0,481.26,1.00); Sm (SG, 2x3.00); Cm (19:40)

TOF MS ES+  
5.38e4

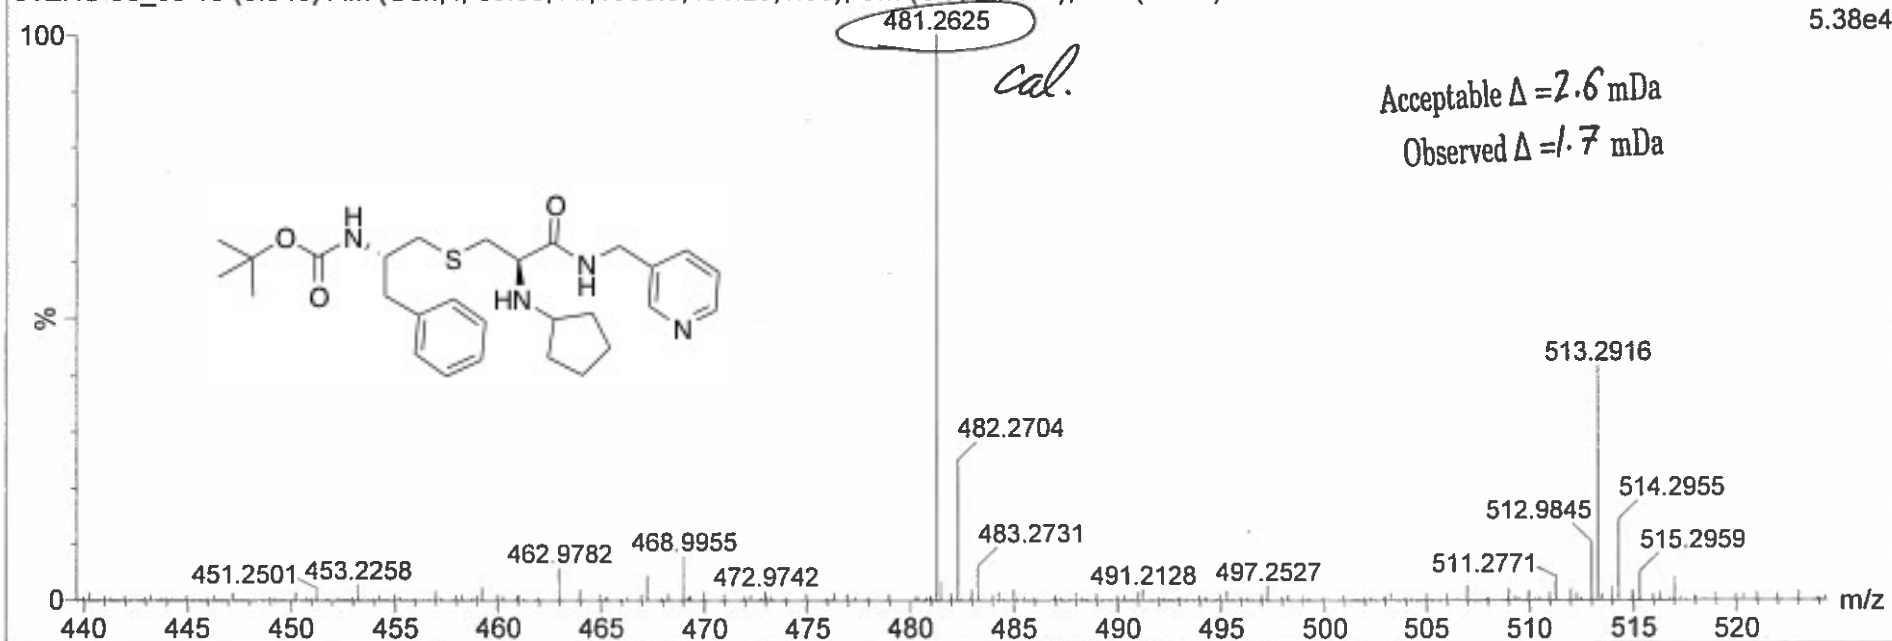

01ERS-77\_05 (0.019) Is (1.00,0.01) C<sub>29</sub>H<sub>36</sub>N<sub>4</sub>O<sub>3</sub>Na

TOF MS ES+  
6.71e12

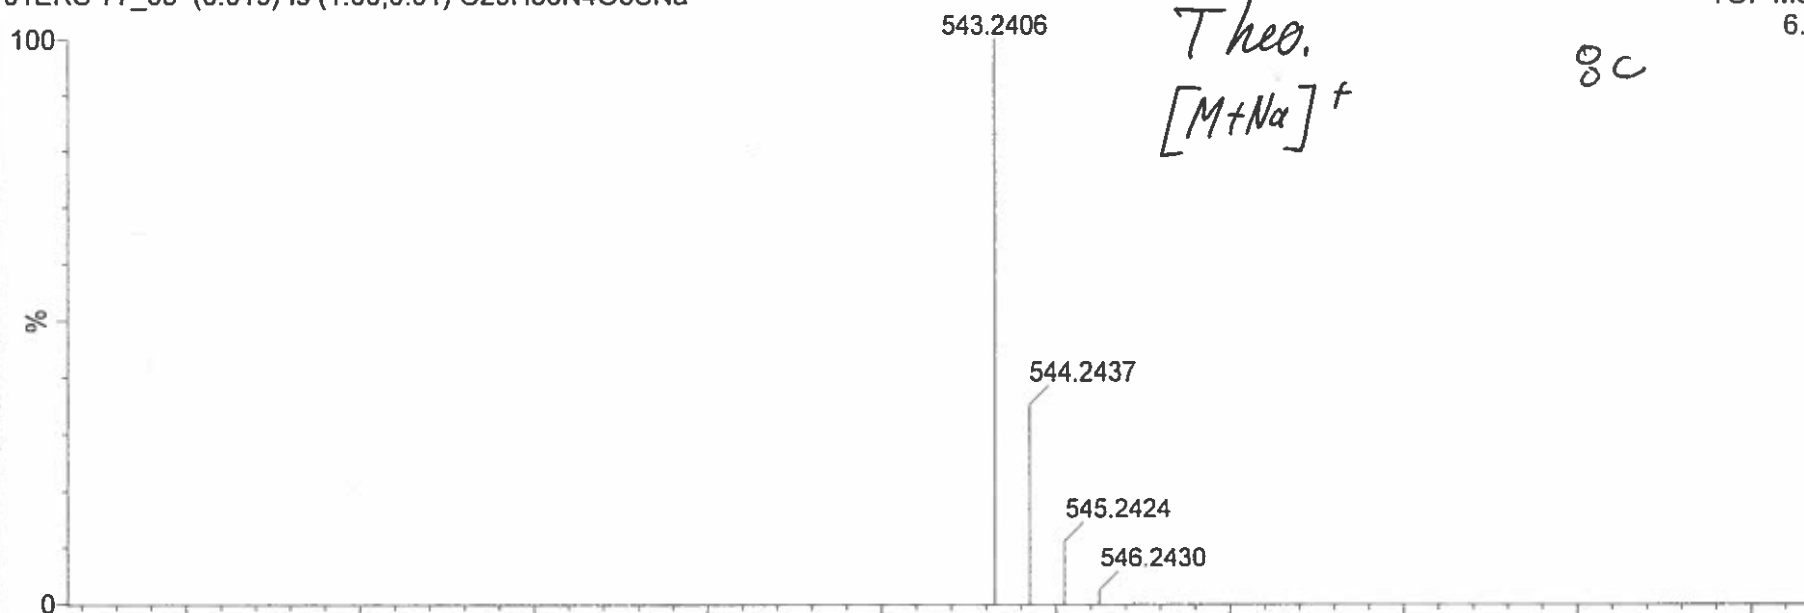

01ERS-77\_05 36 (0.660) AM (Cen,4, 80.00, Ar,1000.0,525.29,1.00); Sm (SG, 2x3.00); Cm (34:51)

TOF MS ES+  
1.26e4

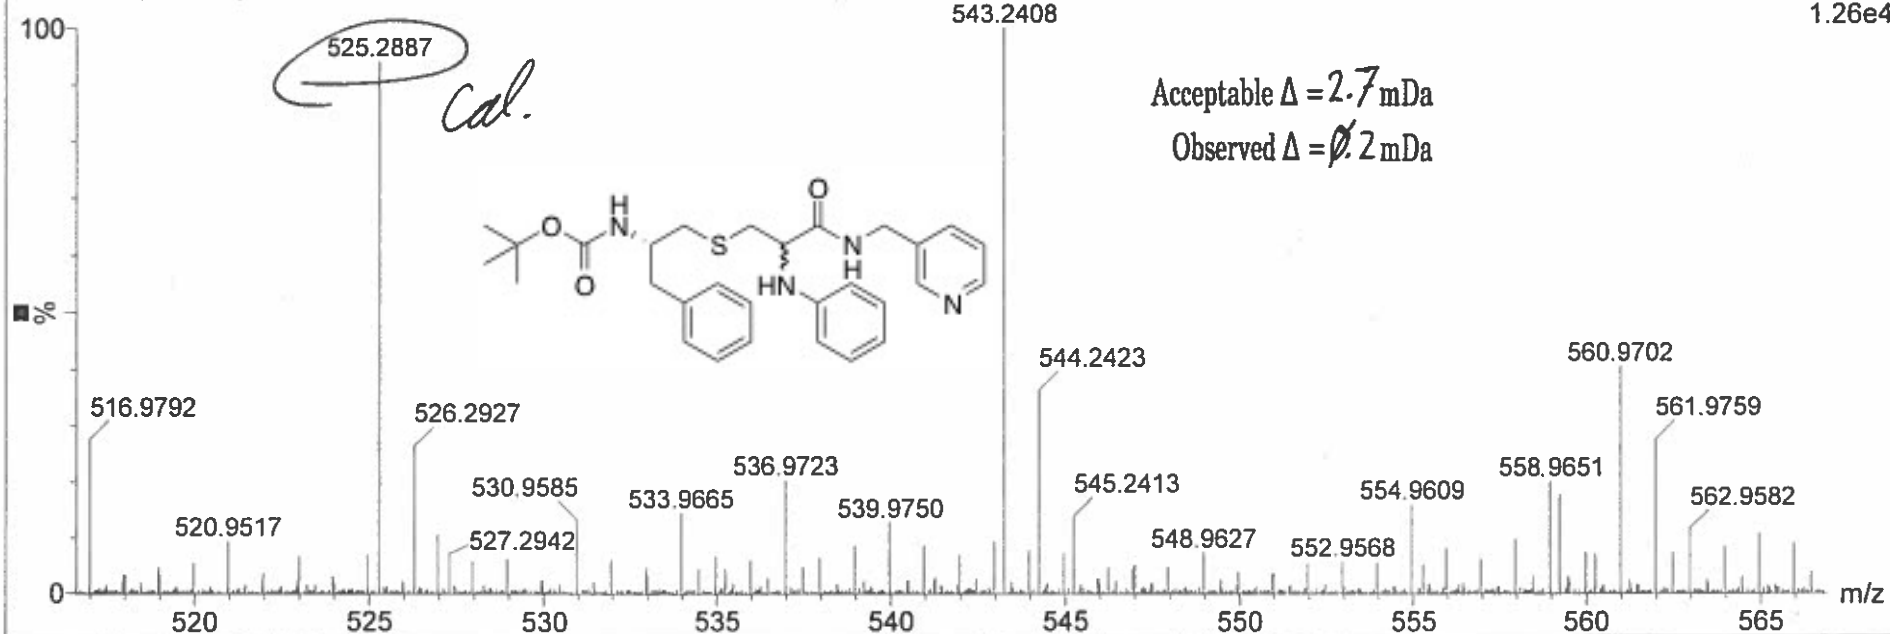

01ERS-71\_05 (0.019) Is (1.00,0.01) C<sub>28</sub>H<sub>39</sub>N<sub>5</sub>O<sub>3</sub>Na

TOF MS ES+  
6.76e12

8d

Theo.  
[M+Na]<sup>+</sup>

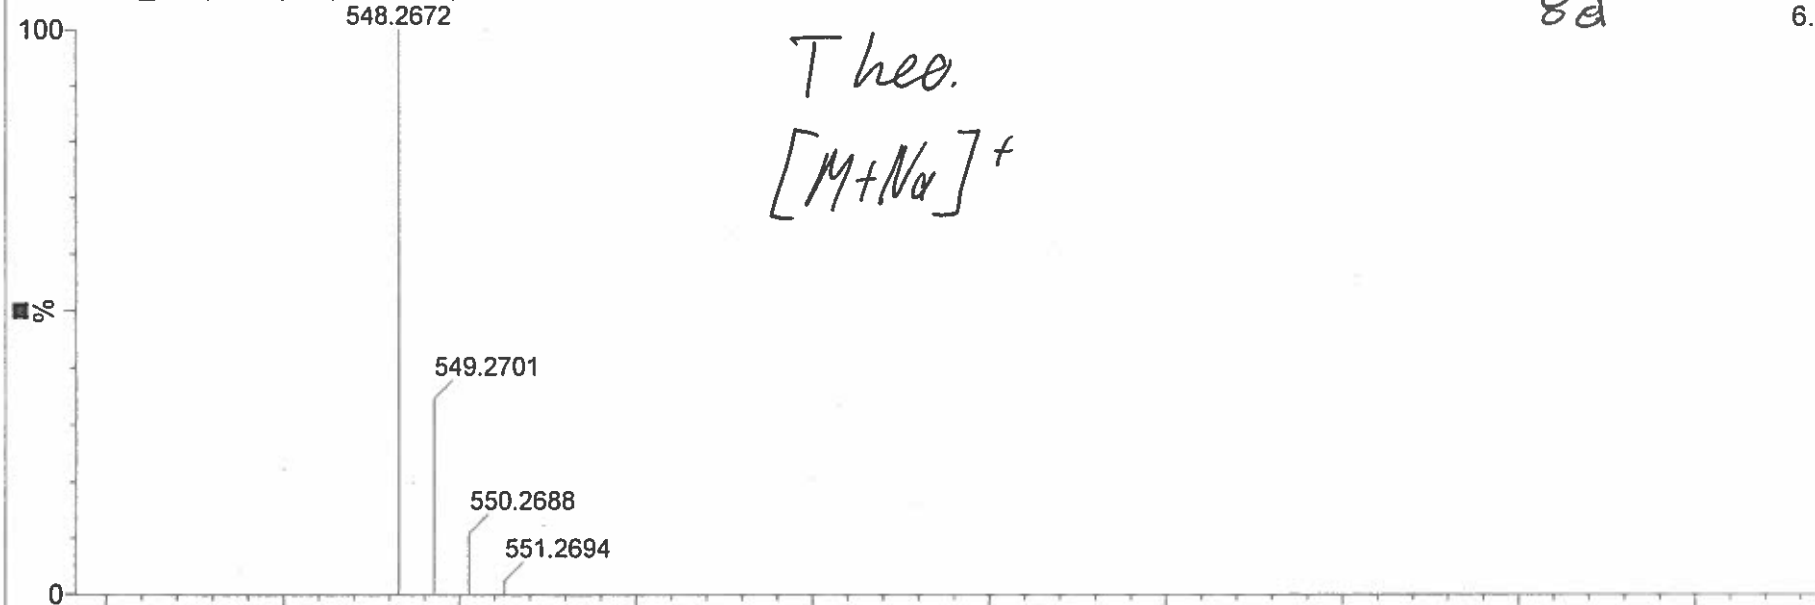

01ERS-71\_05 20 (0.367) AM (Cen,4, 80.00, Ar,1000.0,569.31,1.00); Sm (SG, 2x3.00); Cm (20:28)

TOF MS ES+  
2.02e4

Acceptable  $\Delta = 2.7$  mDa  
Observed  $\Delta = 0.2$  mDa

569.3149 Cal.

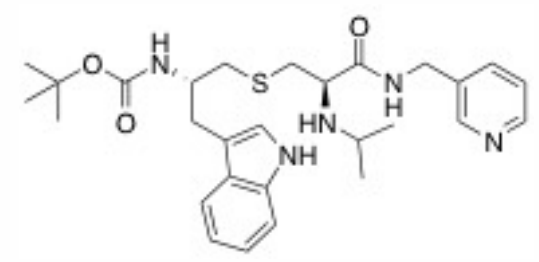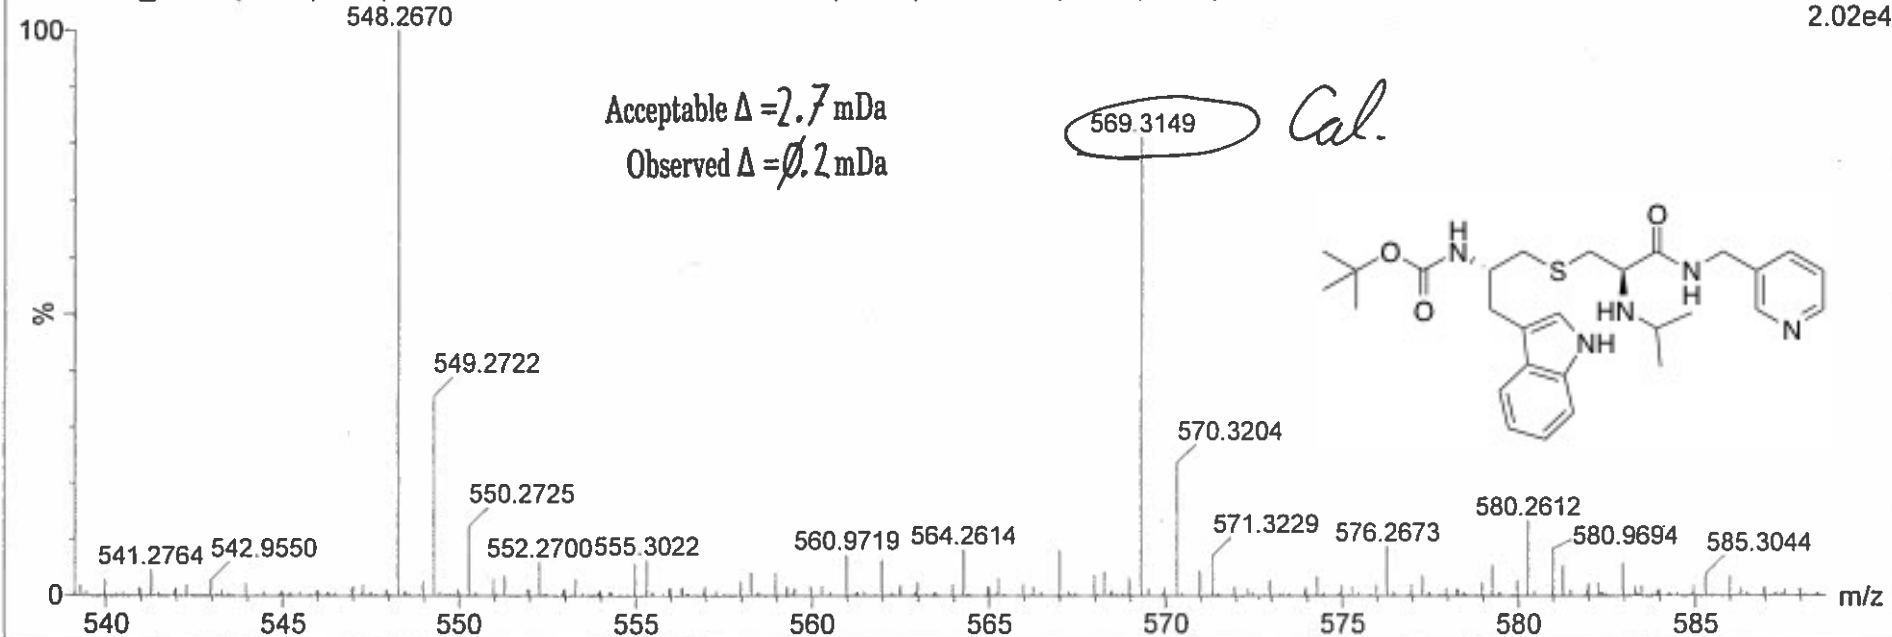

01ERS-68\_07 (0.019) Is (1.00,0.01) C<sub>30</sub>H<sub>41</sub>N<sub>5</sub>O<sub>3</sub>SH

TOF MS ES+  
6.61e12

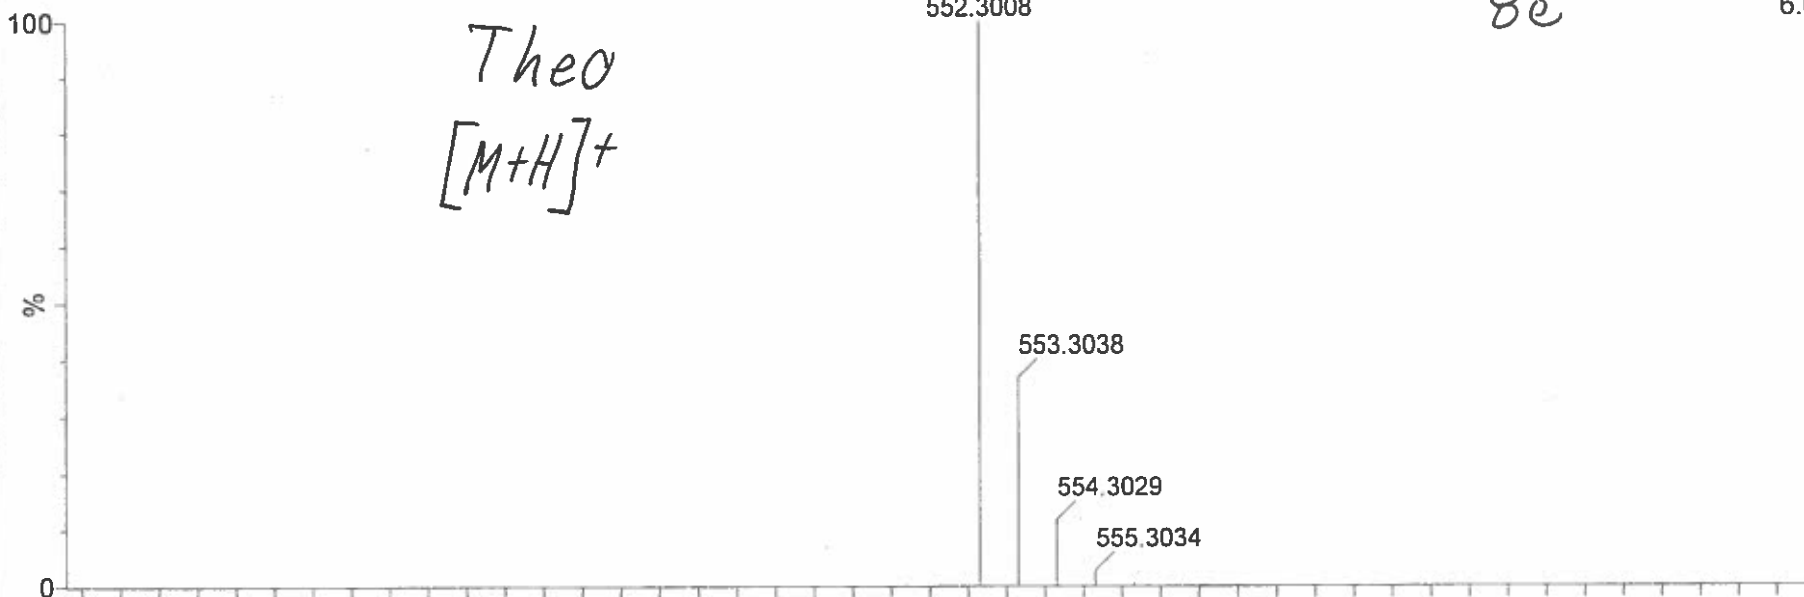

8e

01ERS-68\_07 9 (0.165) AM (Cen,4, 80.00, Ar,1000.0,569.31,1.00); Sm (SG, 2x3.00); Cm (7:9)

TOF MS ES+  
3.58e4

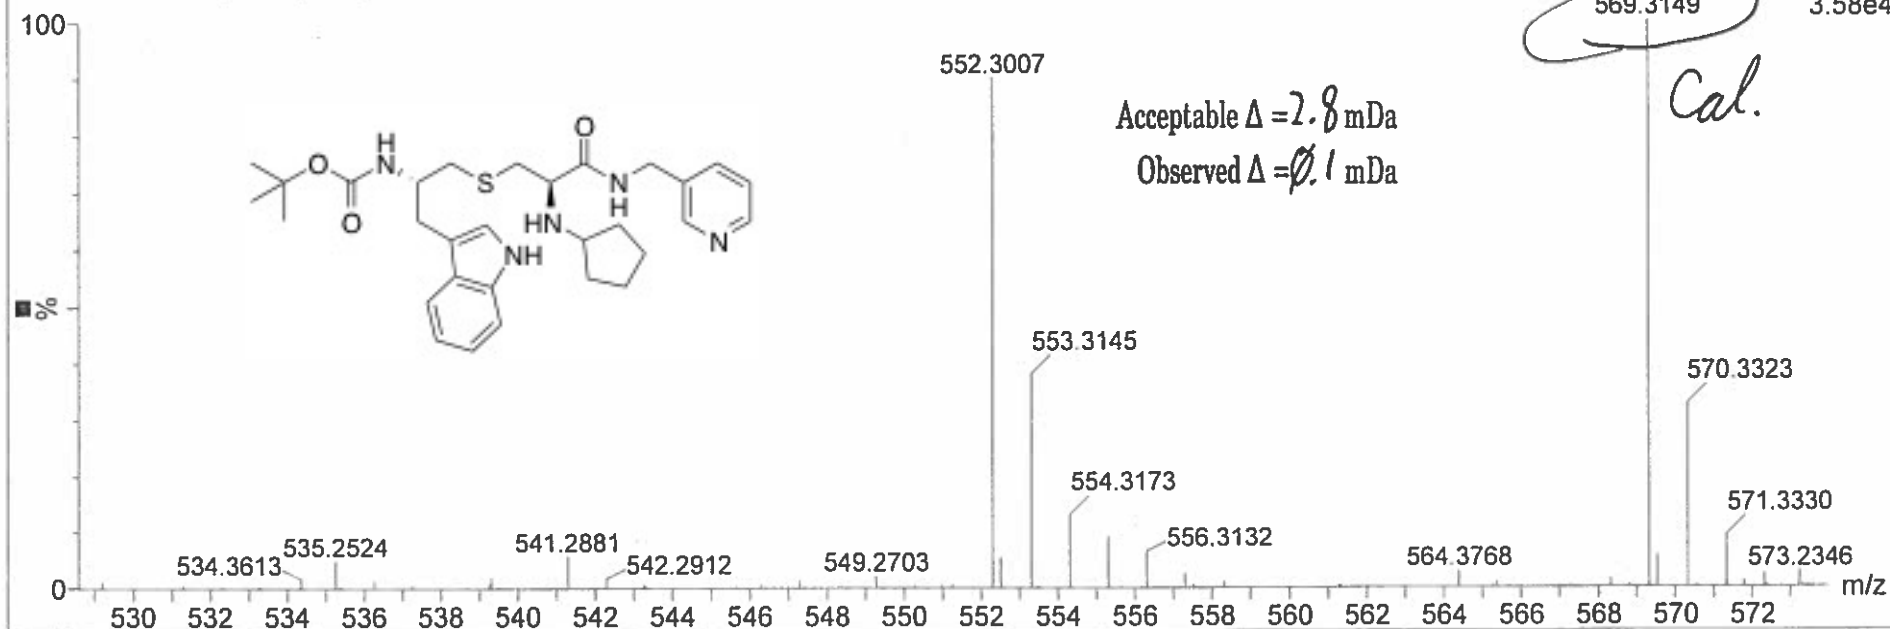

Acceptable  $\Delta = 2.8$  mDa  
Observed  $\Delta = 0.1$  mDa

569.3149  
Cal.



01ERS-83\_05 (0.019) Is (1.00,0.01) C<sub>31</sub>H<sub>37</sub>N<sub>5</sub>O<sub>3</sub>Na

TOF MS ES+  
6.54e12

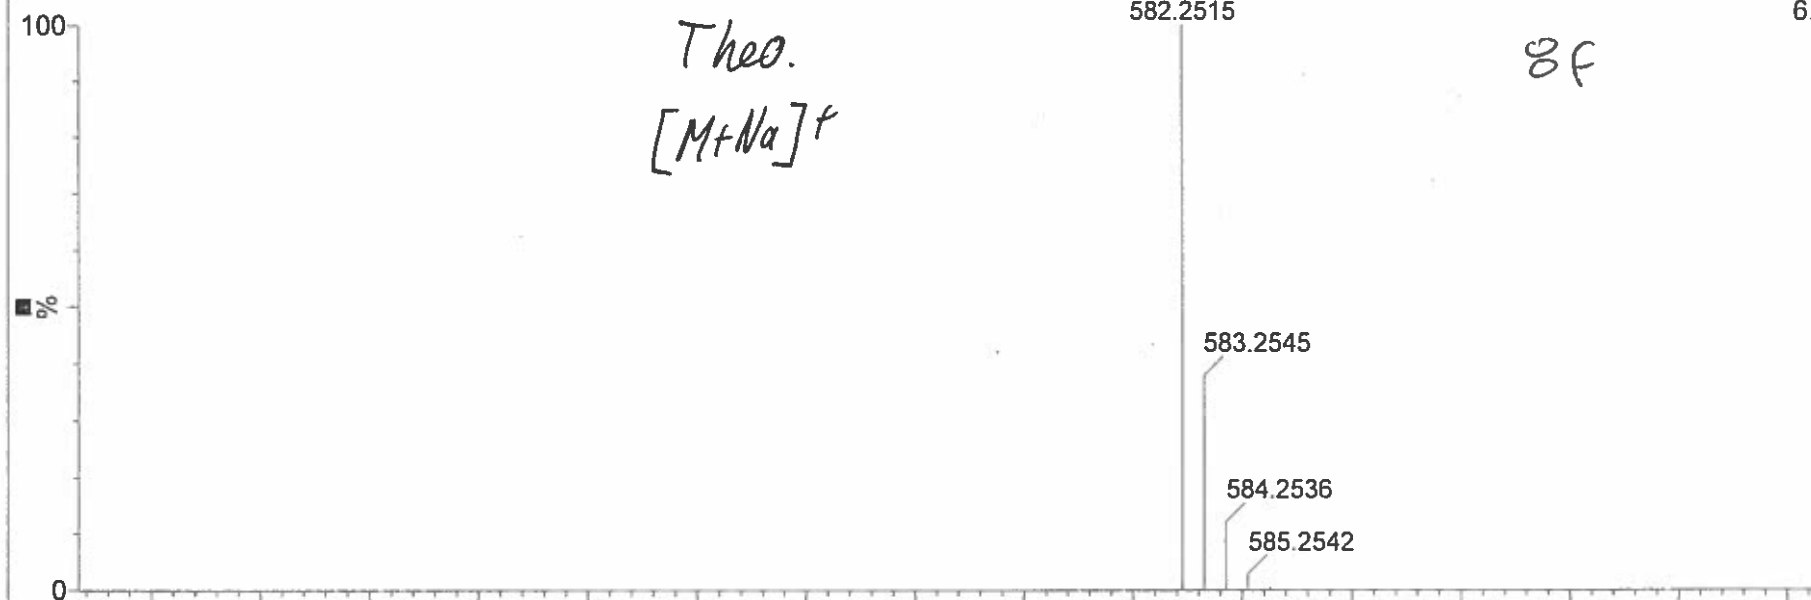

01ERS-83\_05 19 (0.349) AM (Cen,4, 80.00, Ar,1000.0,569.31,1.00); Sm (SG, 2x3.00); Cm (19:20)

TOF MS ES+  
1.42e4

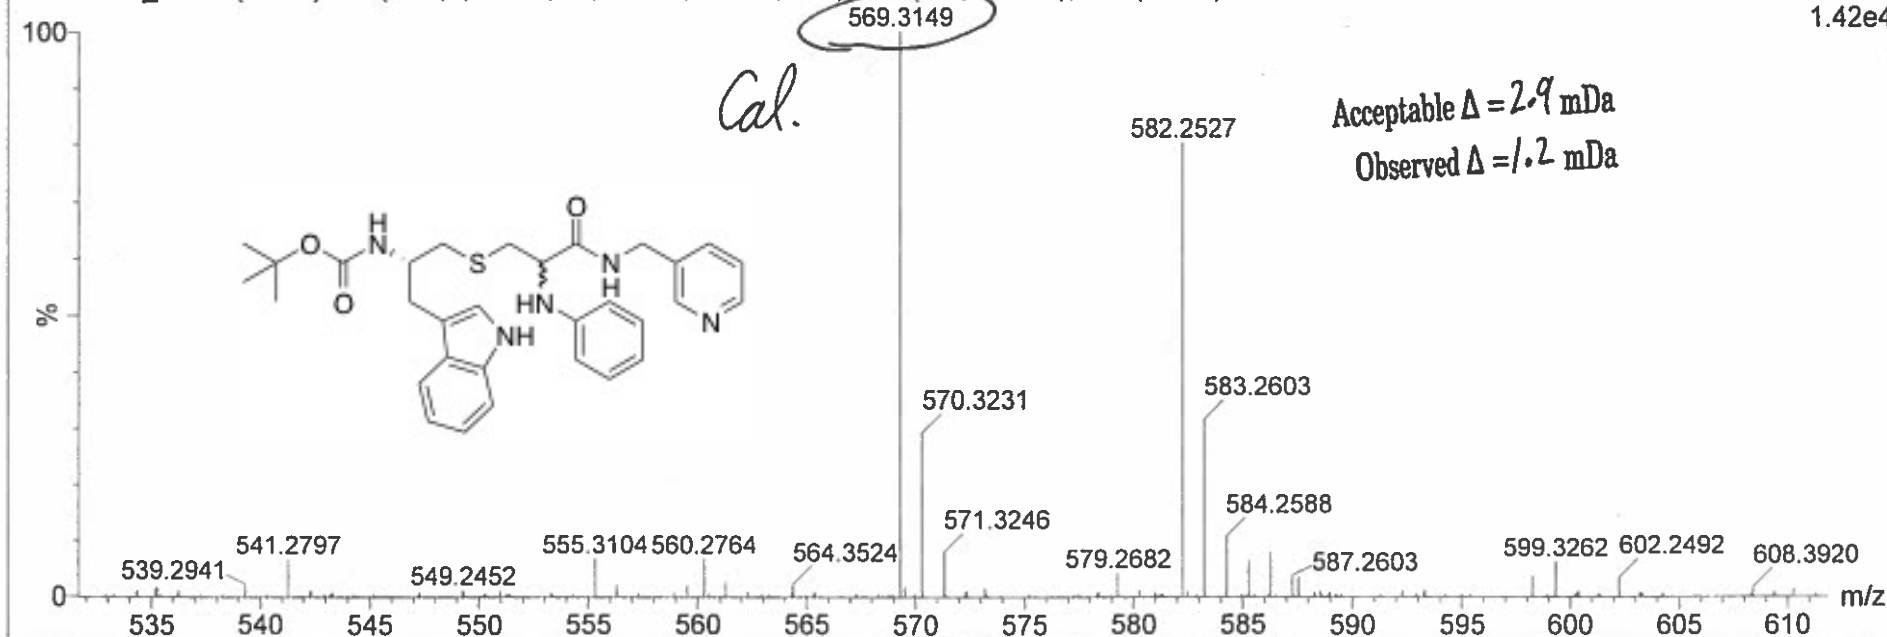

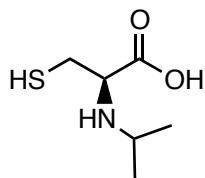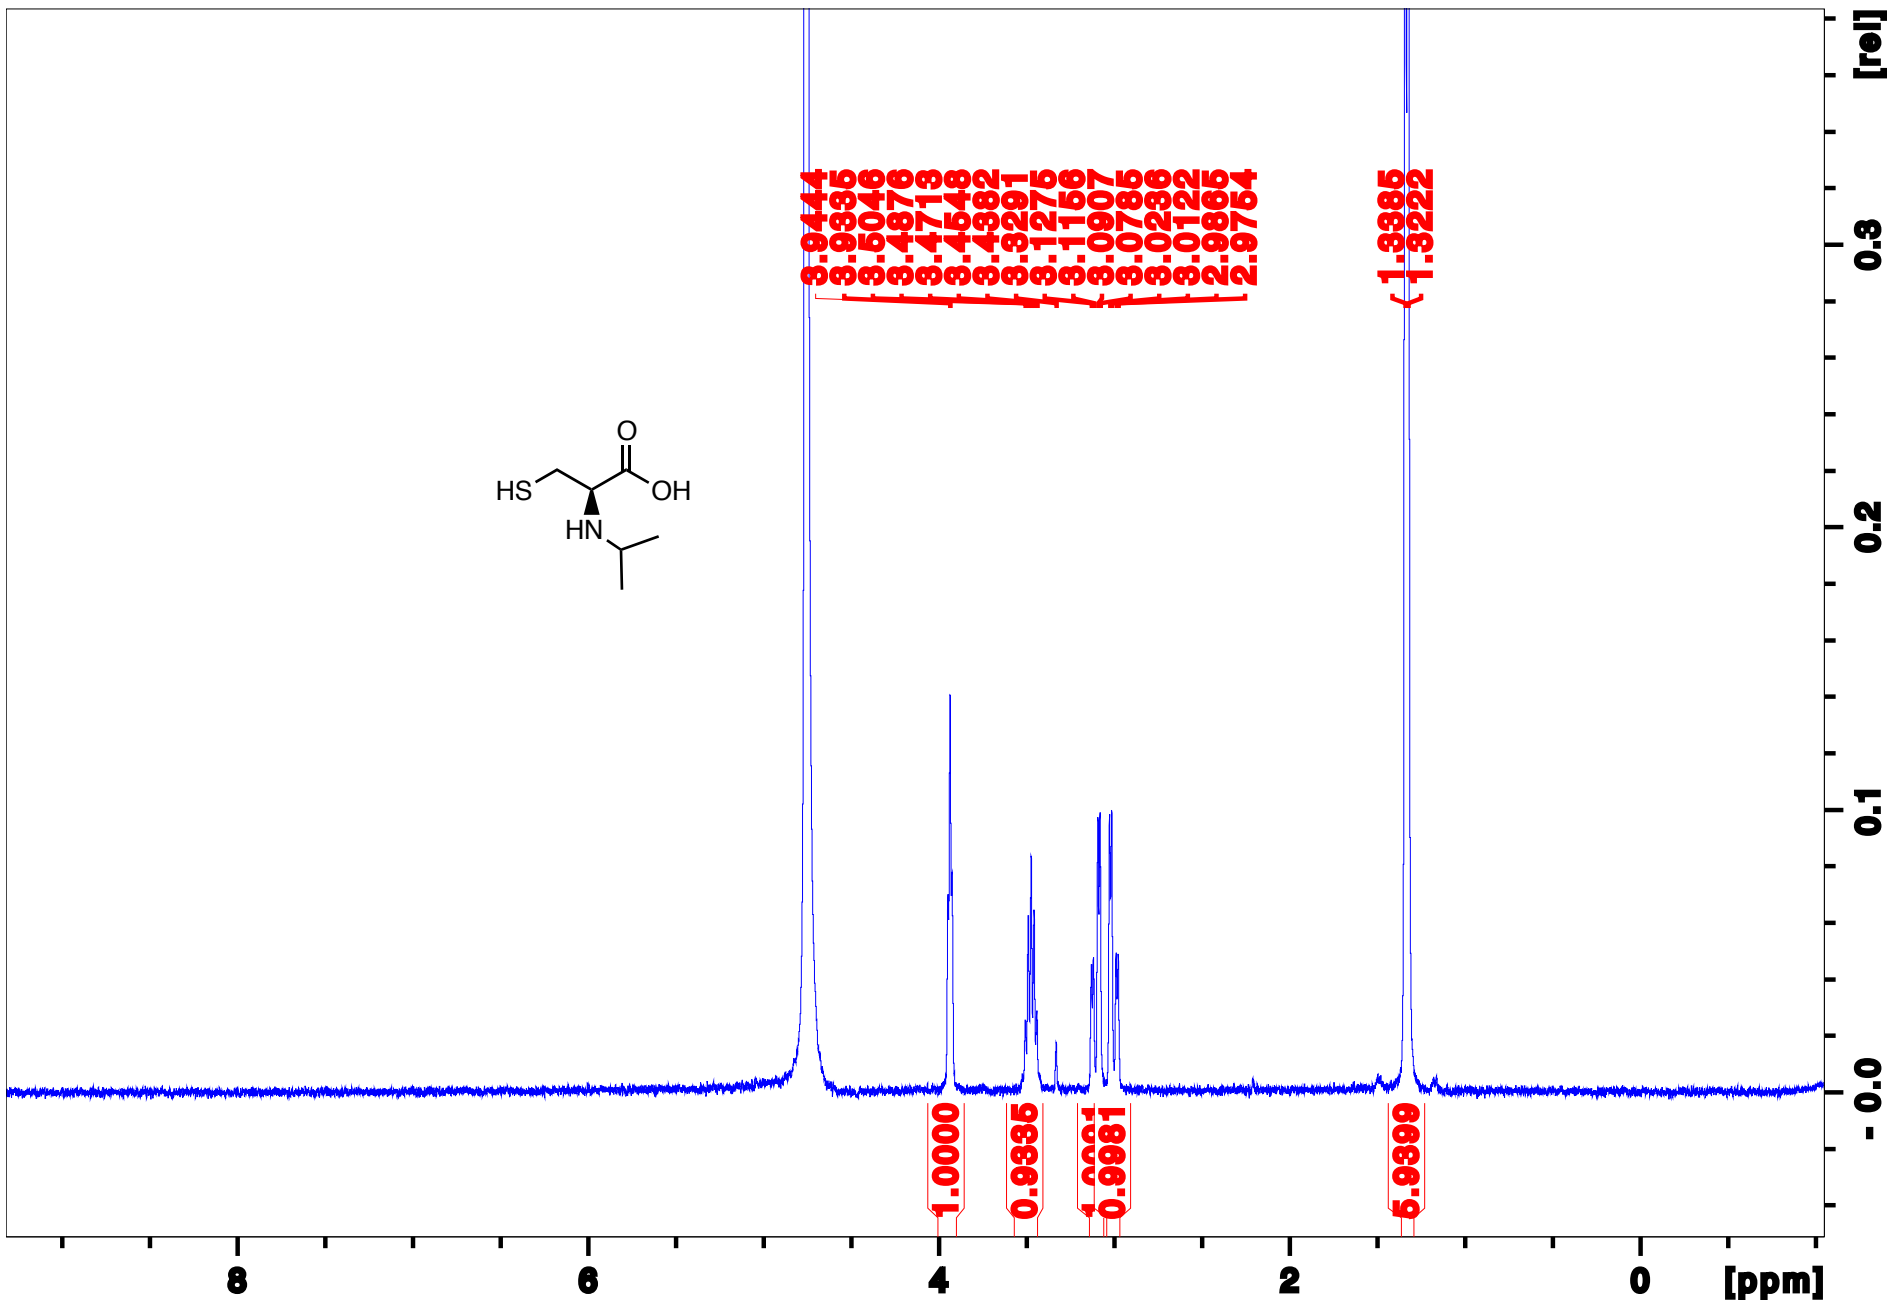

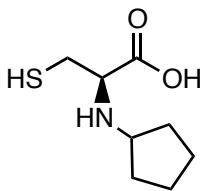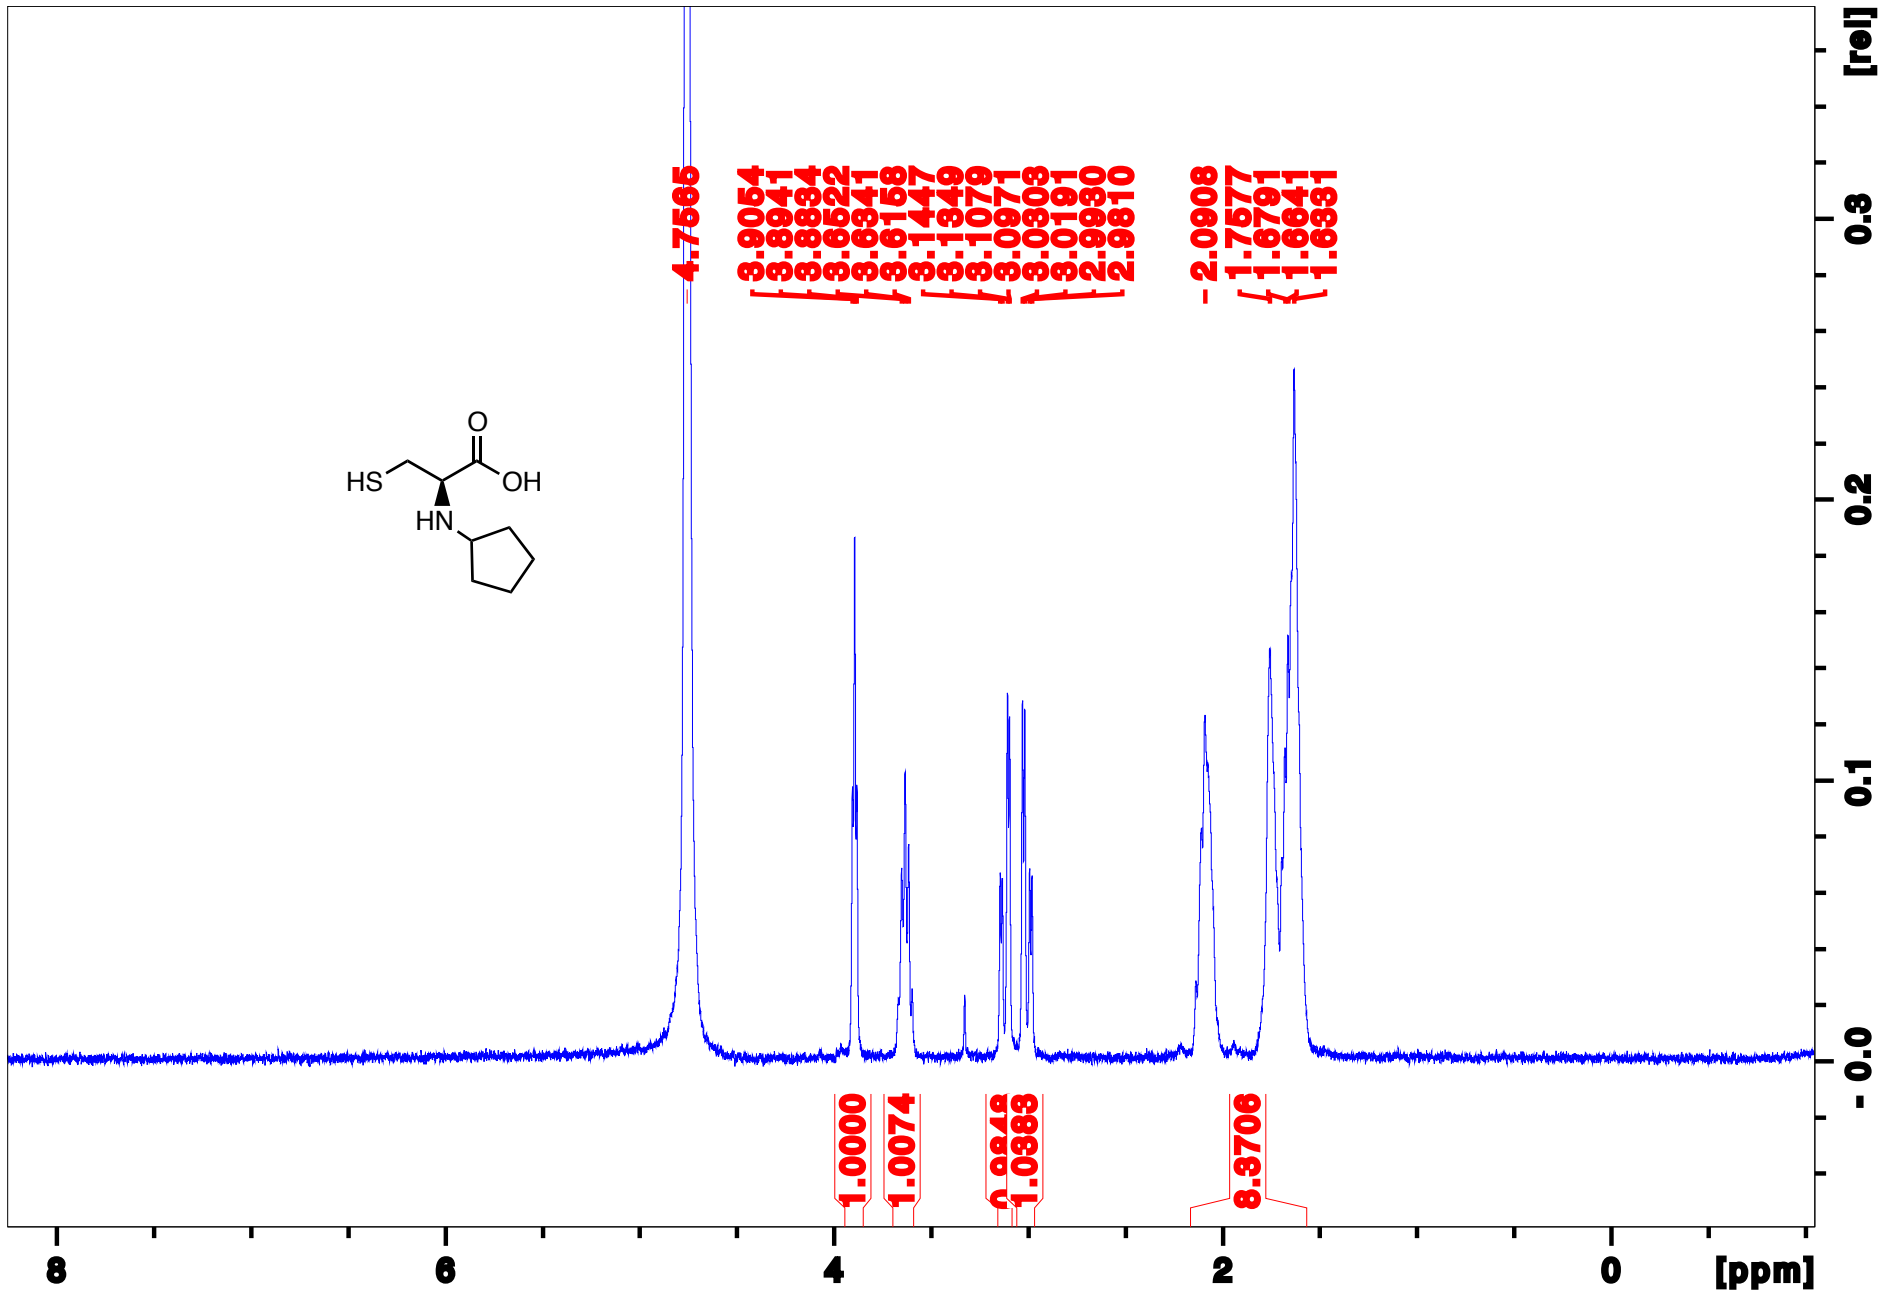

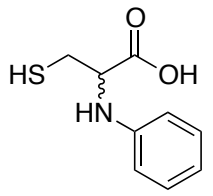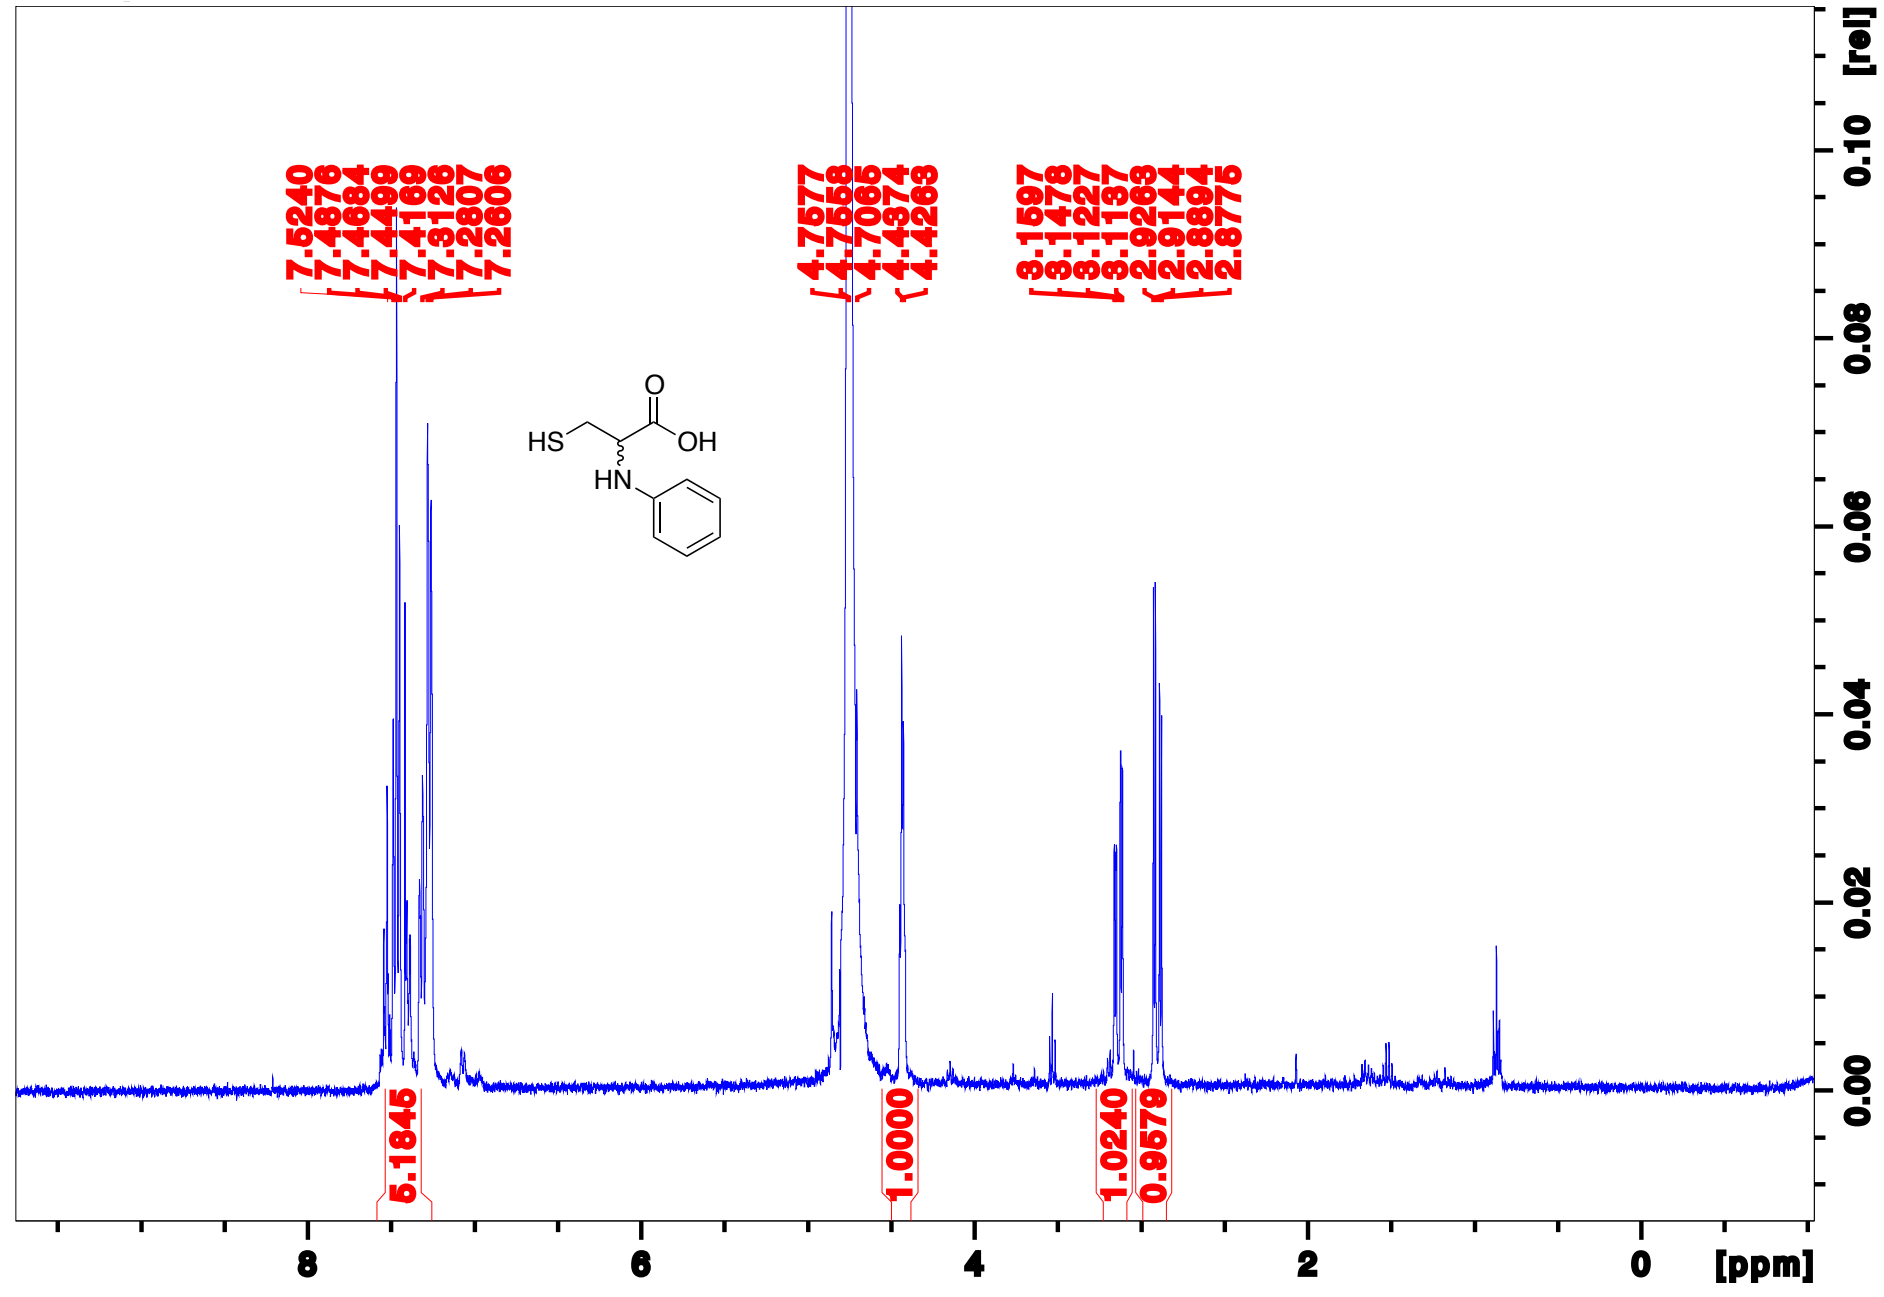

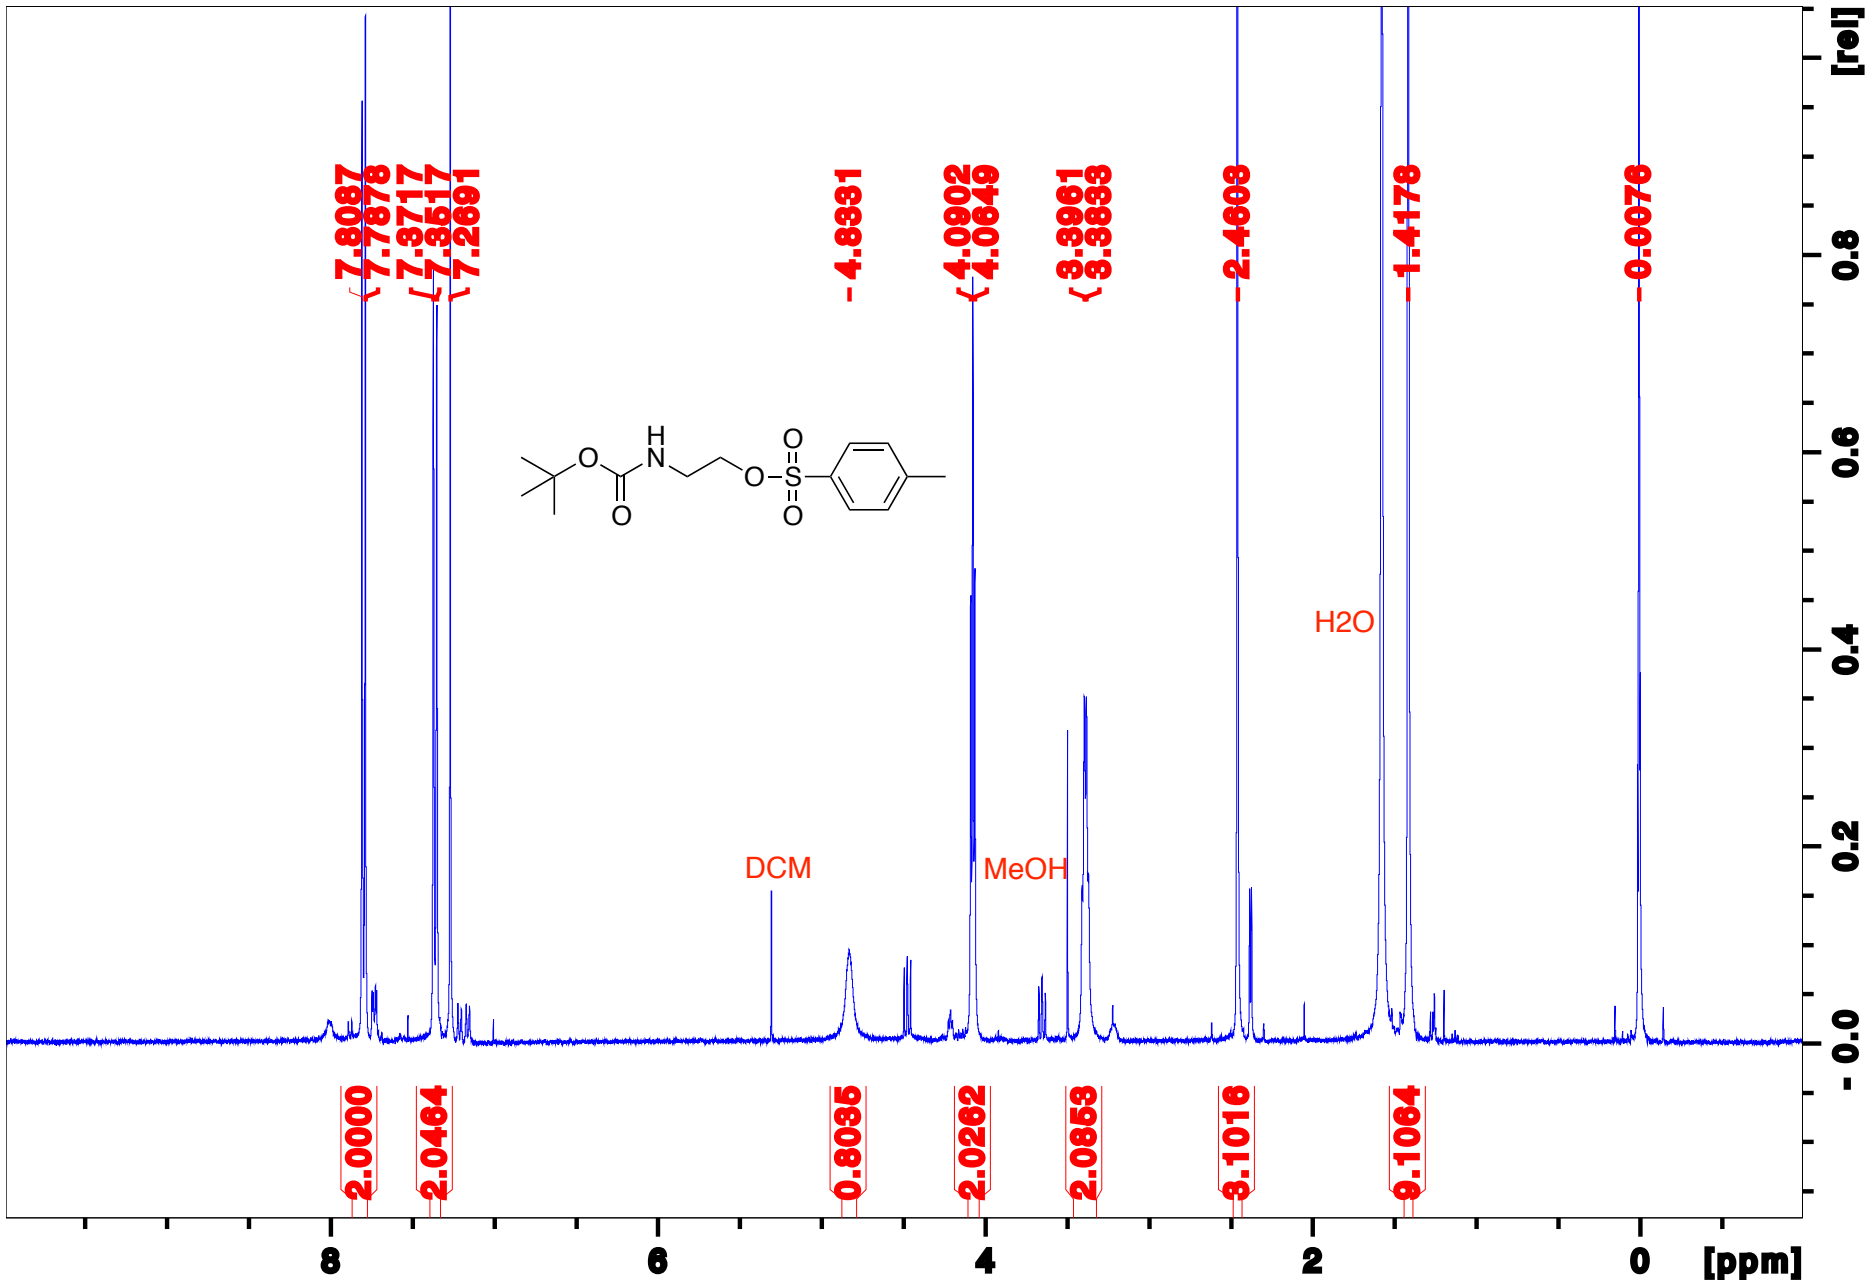

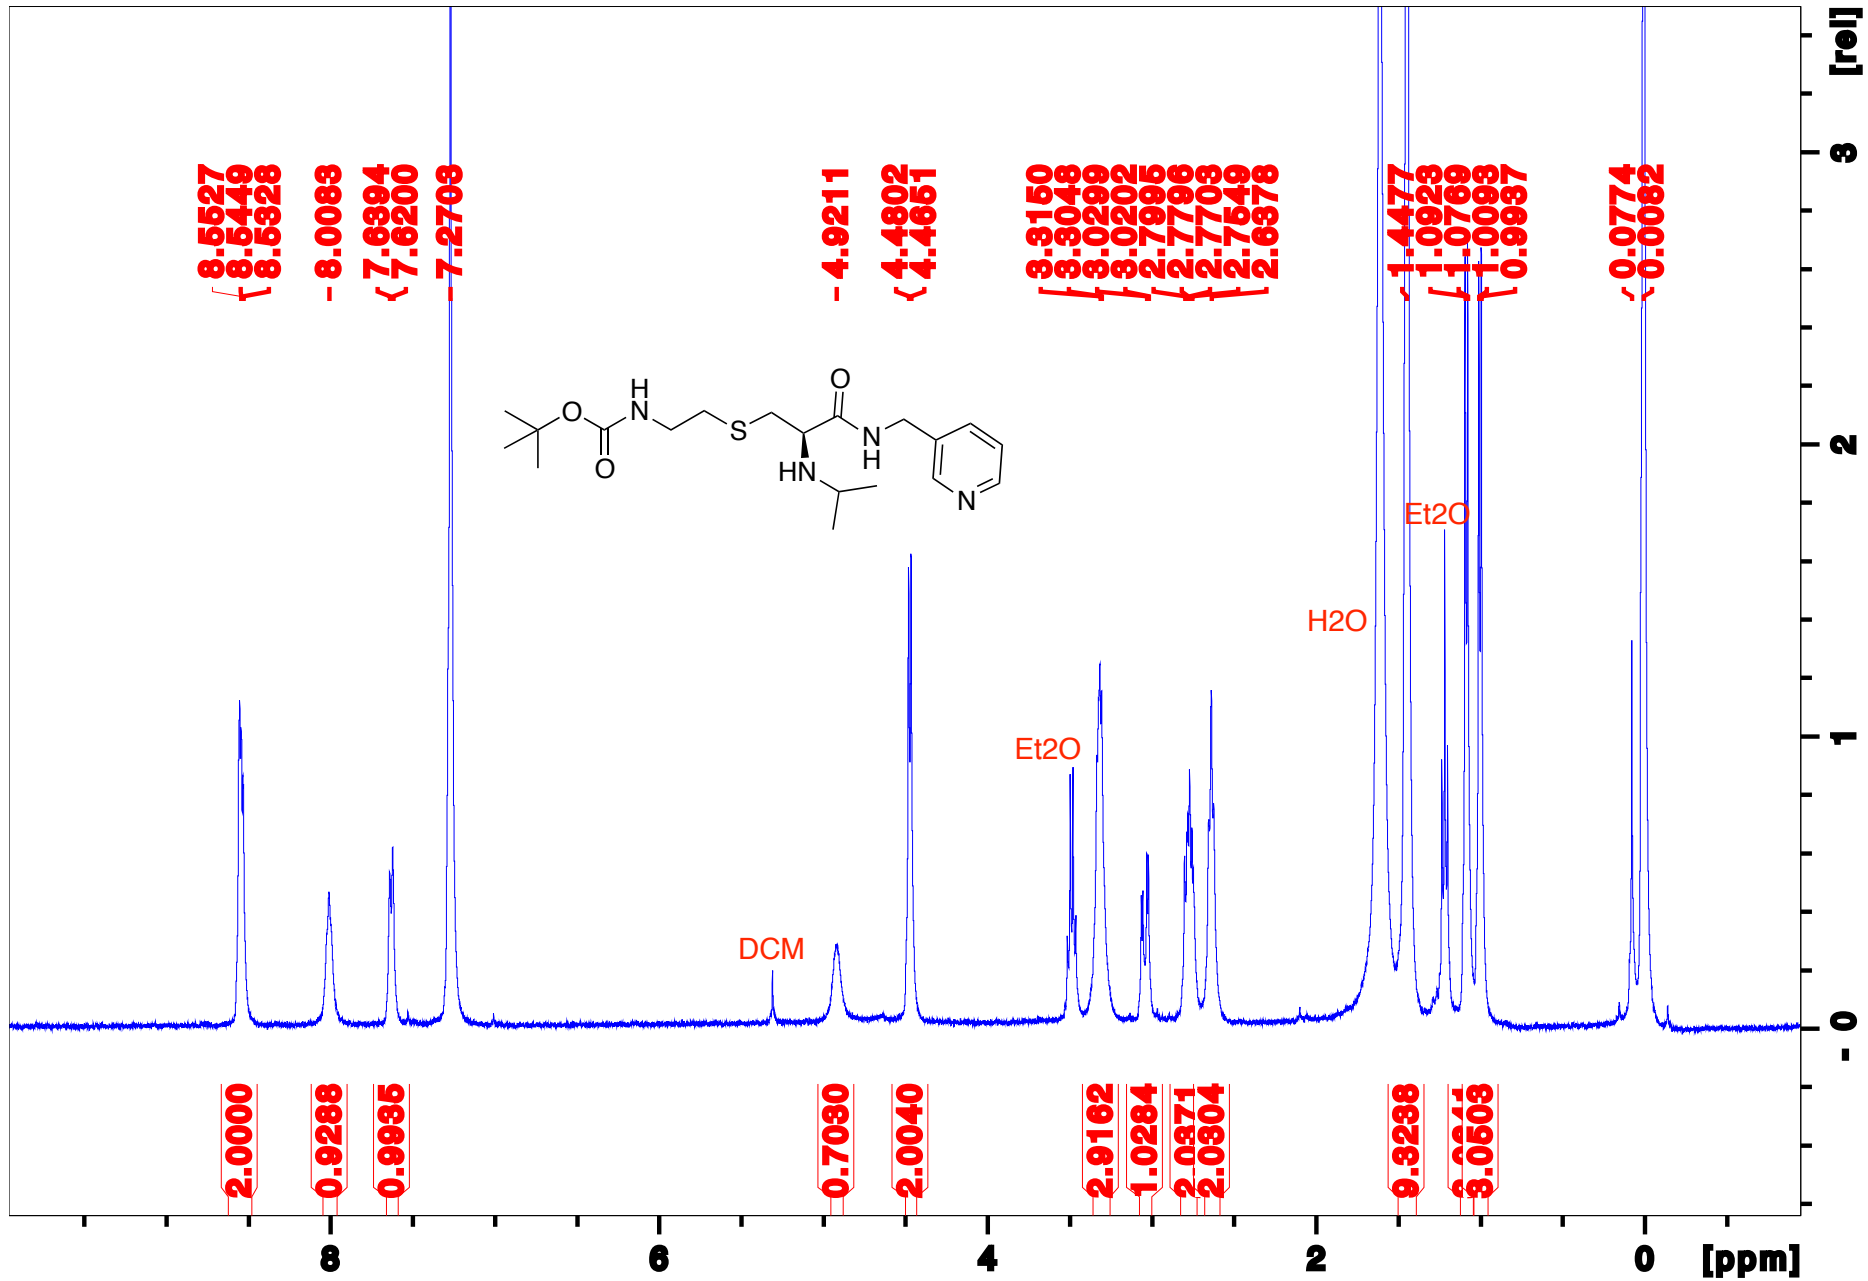

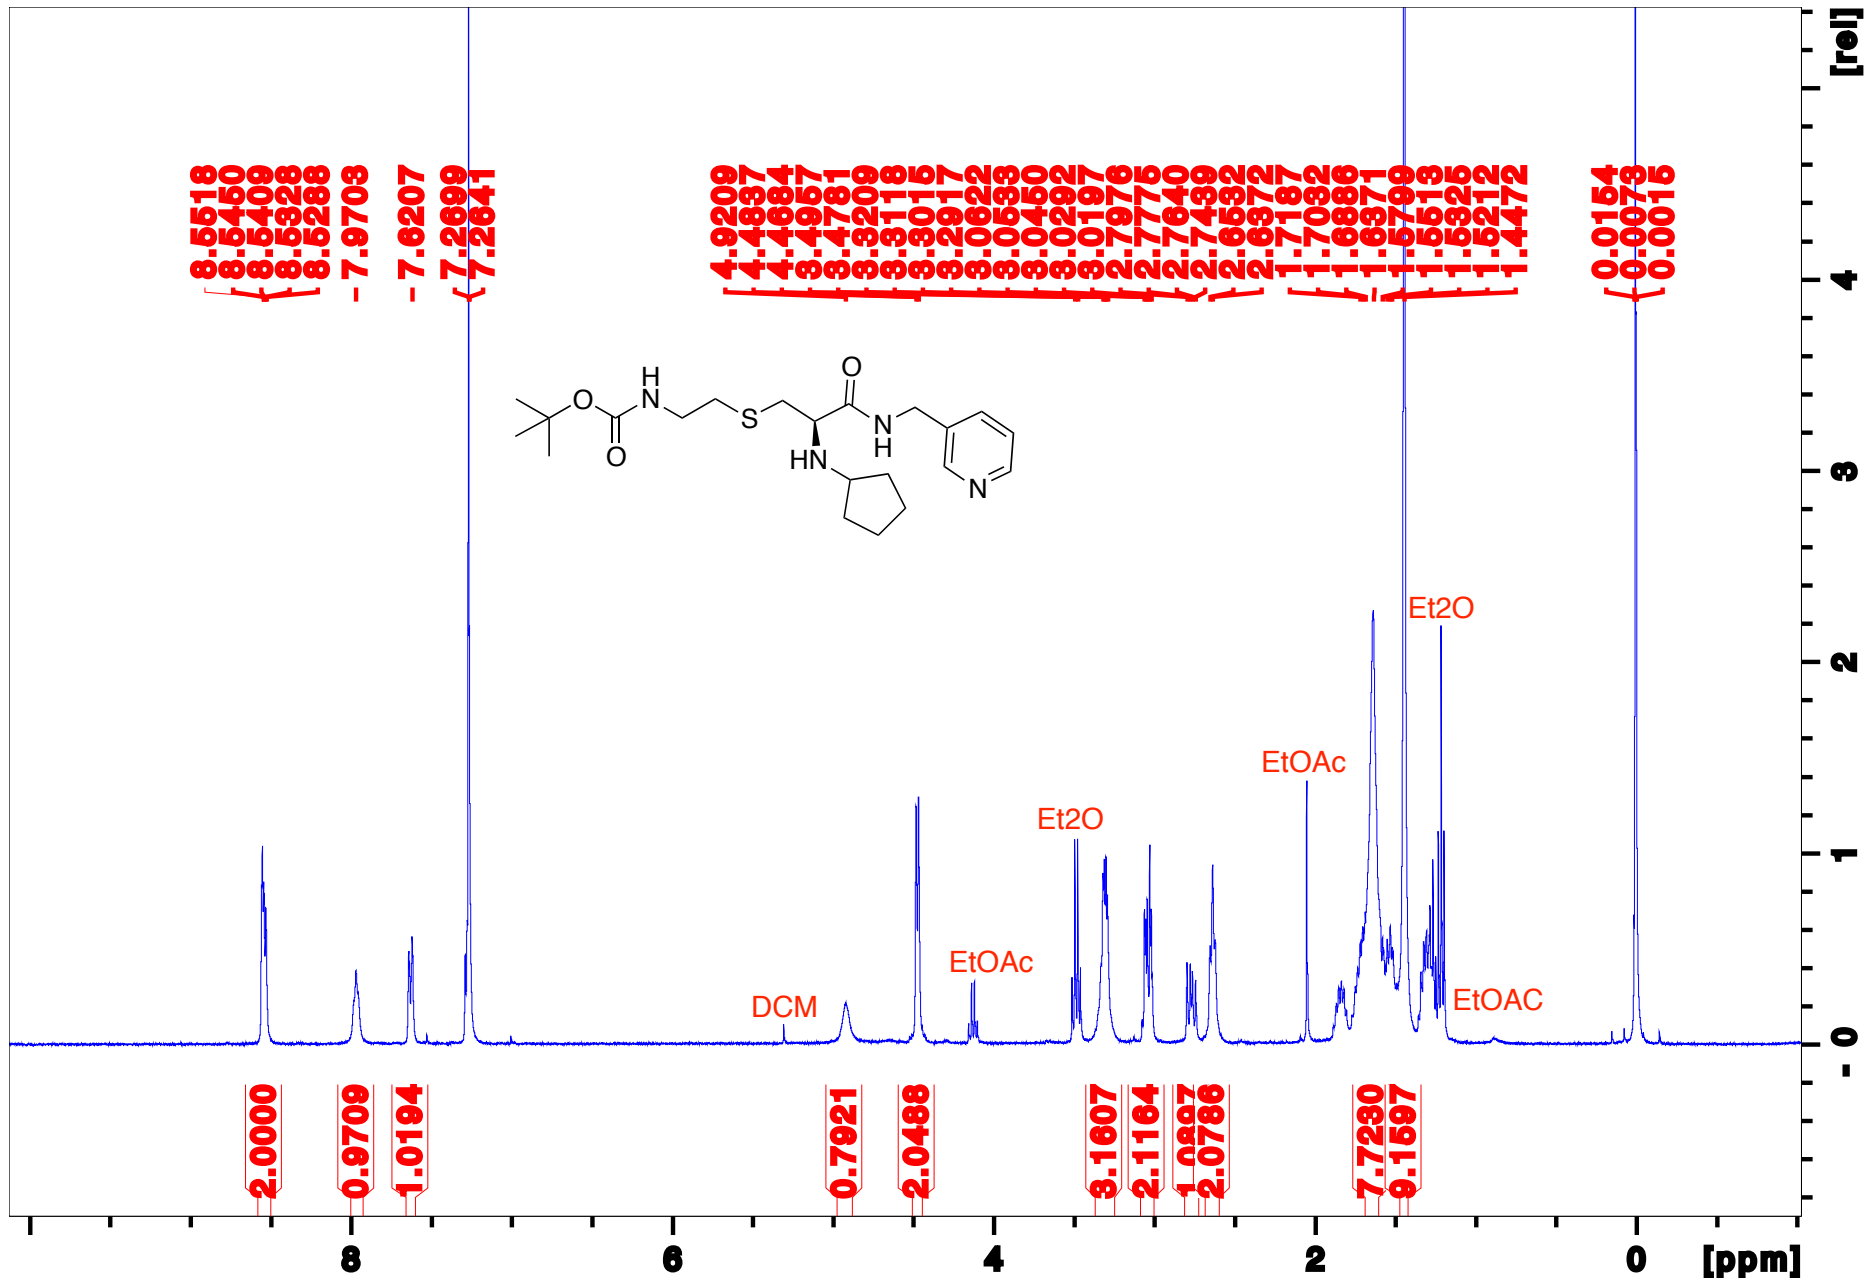

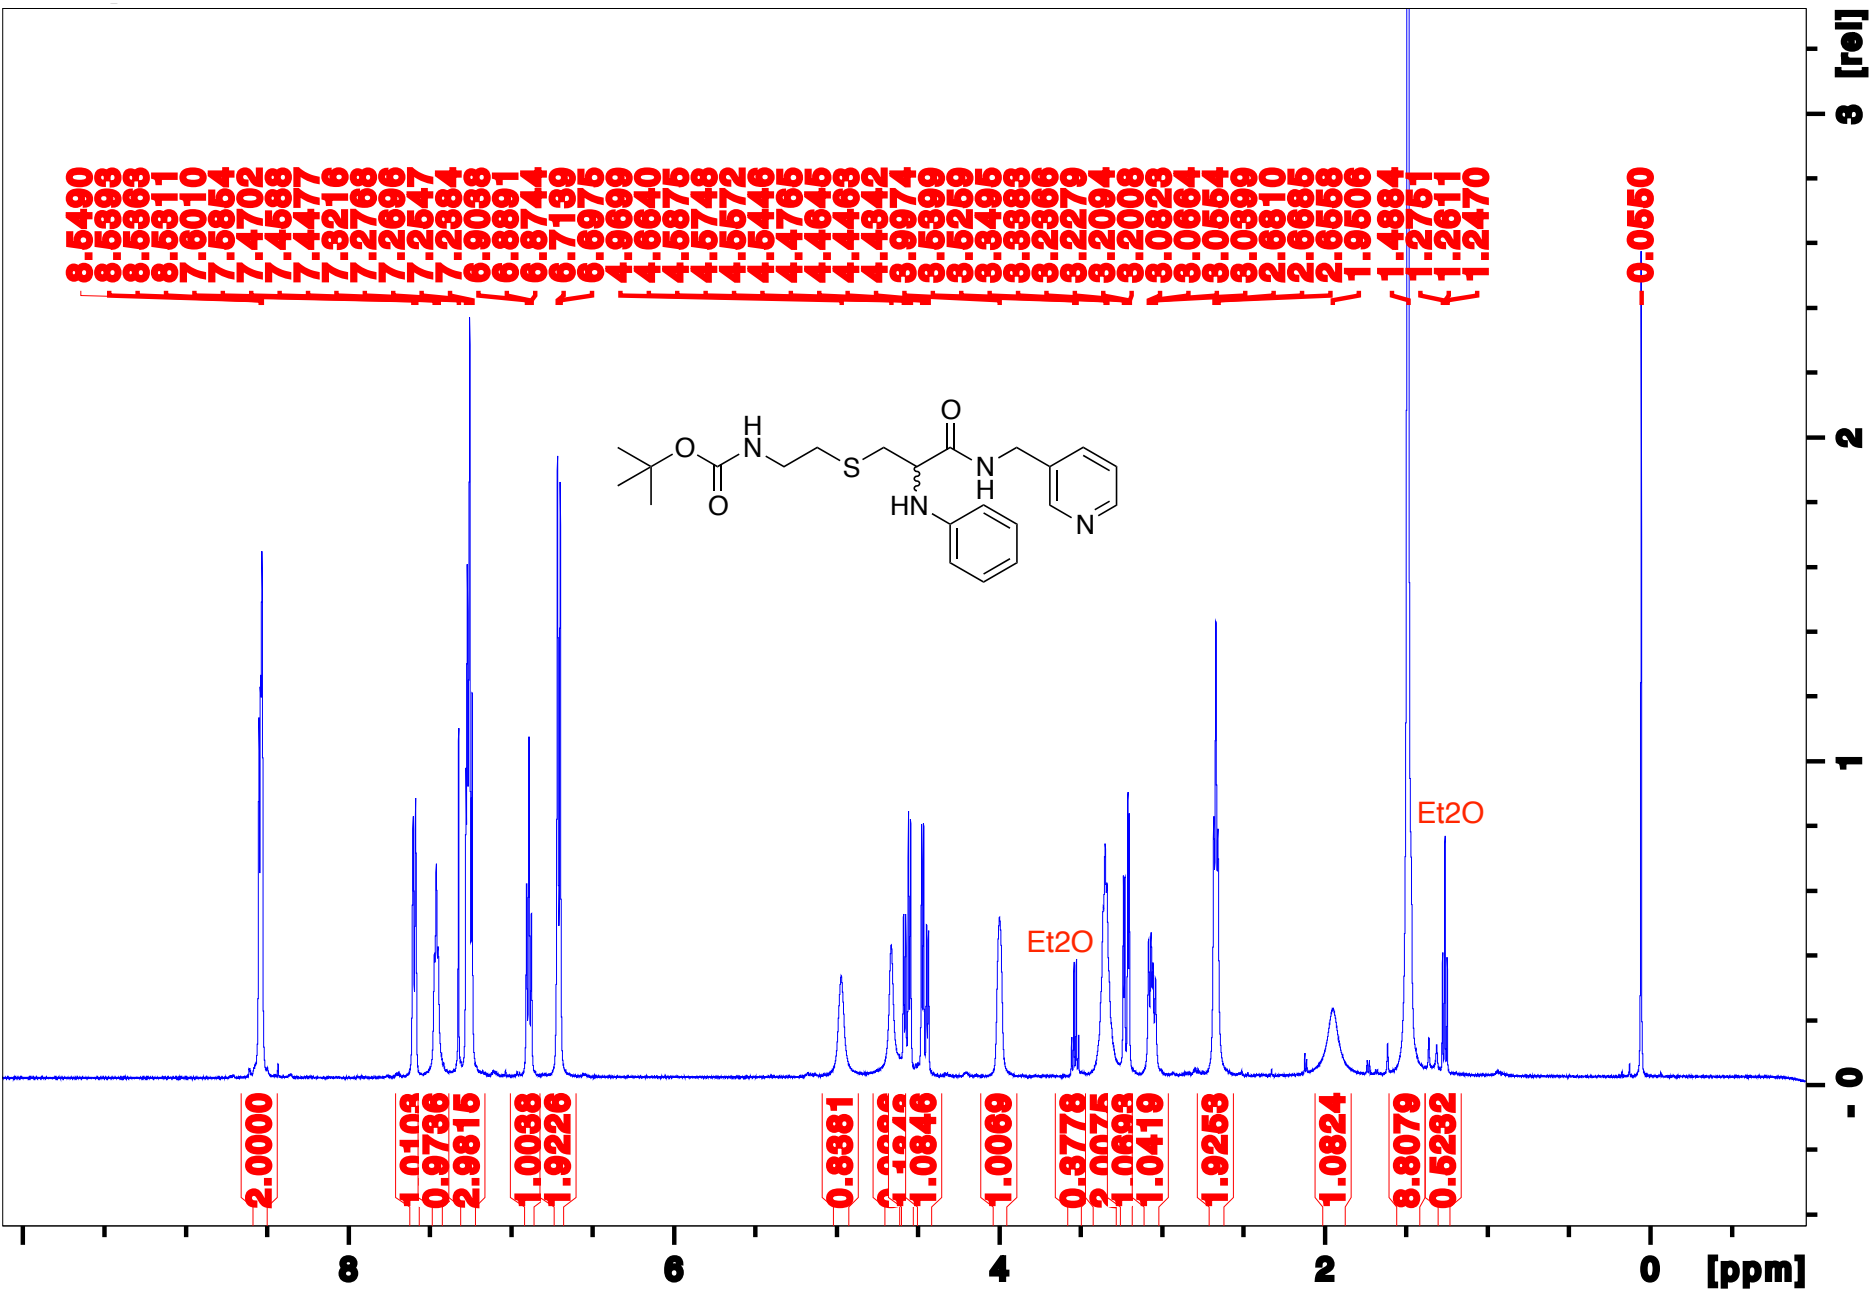



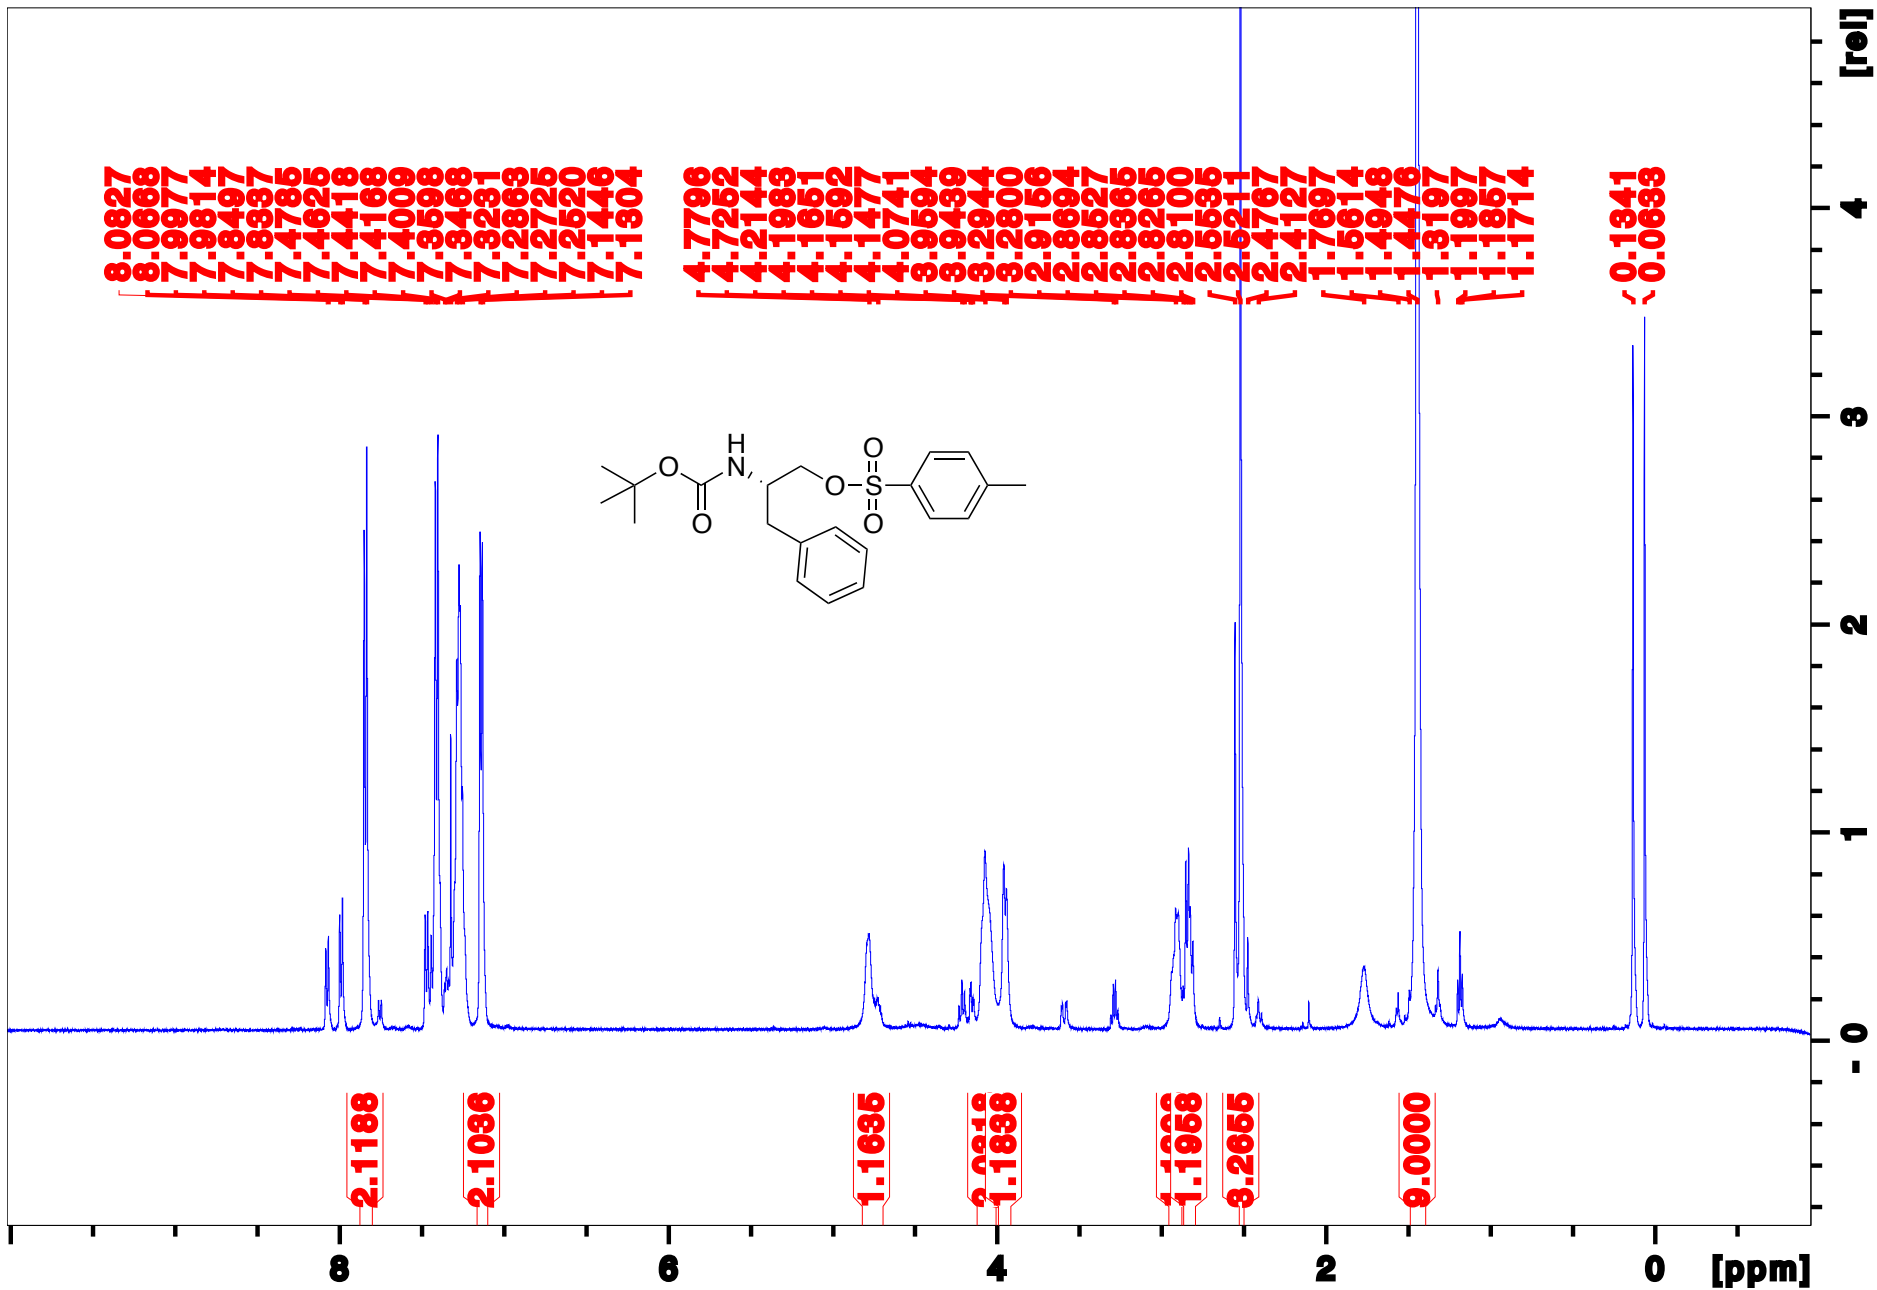

7.7759  
7.7550  
7.6187  
7.5980  
7.5648  
7.5290  
7.3689  
7.3491  
7.3287  
7.3083  
7.2204  
7.2025  
7.1824  
7.1329  
7.1193  
7.0957  
7.0023

- 4.7693  
4.2077  
4.1408  
4.1230  
4.0025

3.0550  
3.0408  
3.0027  
2.9816  
2.9449  
- 2.4466

1.5699  
1.4122  
1.2841

0.0181  
0.0100

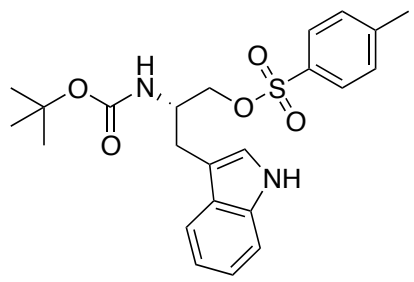

H2O

1.8877  
0.9869  
1.6006  
1.6766  
1.1280

0.7294  
1.8645  
1.9455

2.2885  
3.0038

9.0000

8 6 4 2 0 [ppm]

[rel]

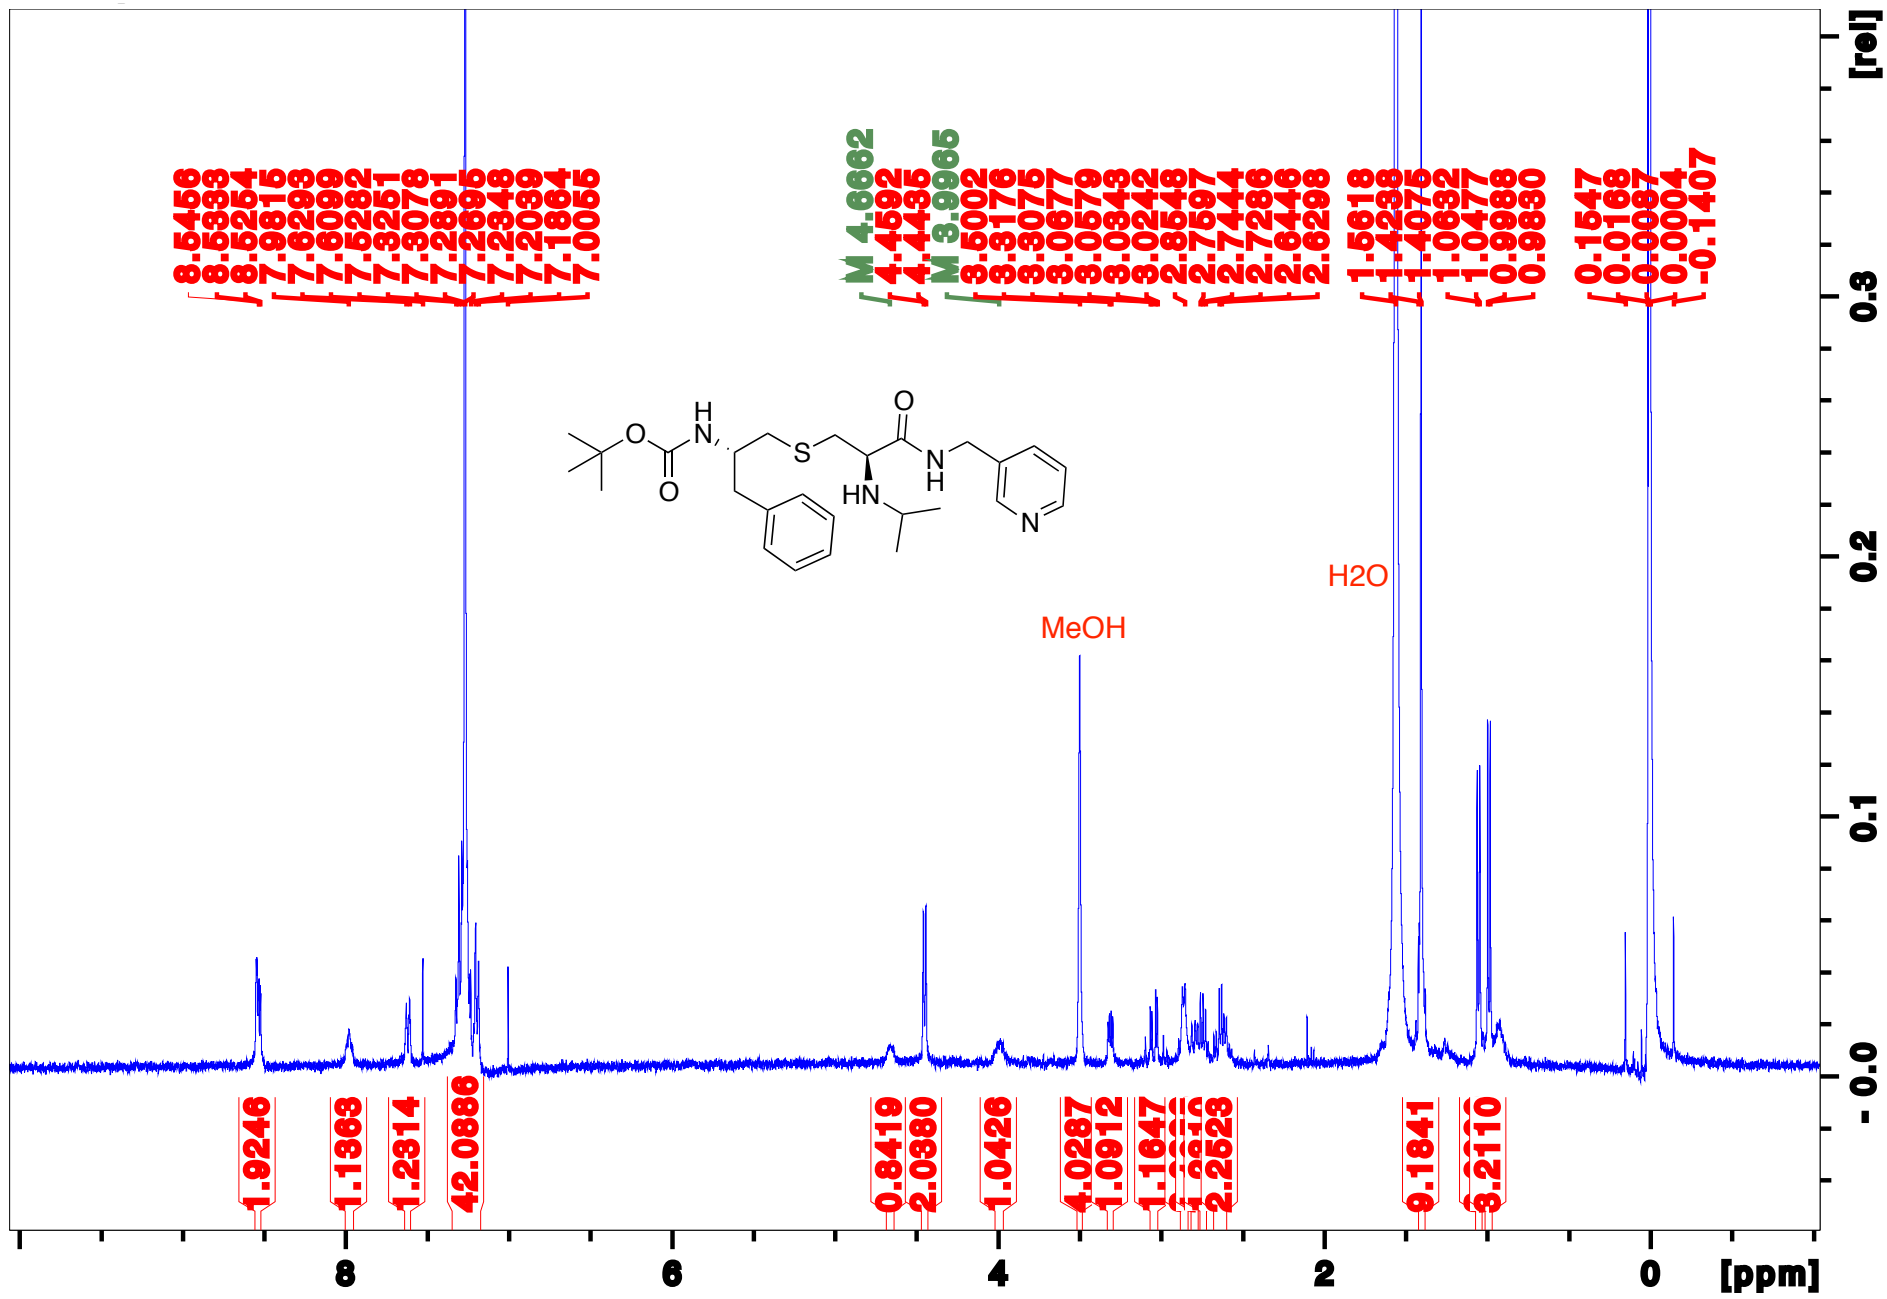

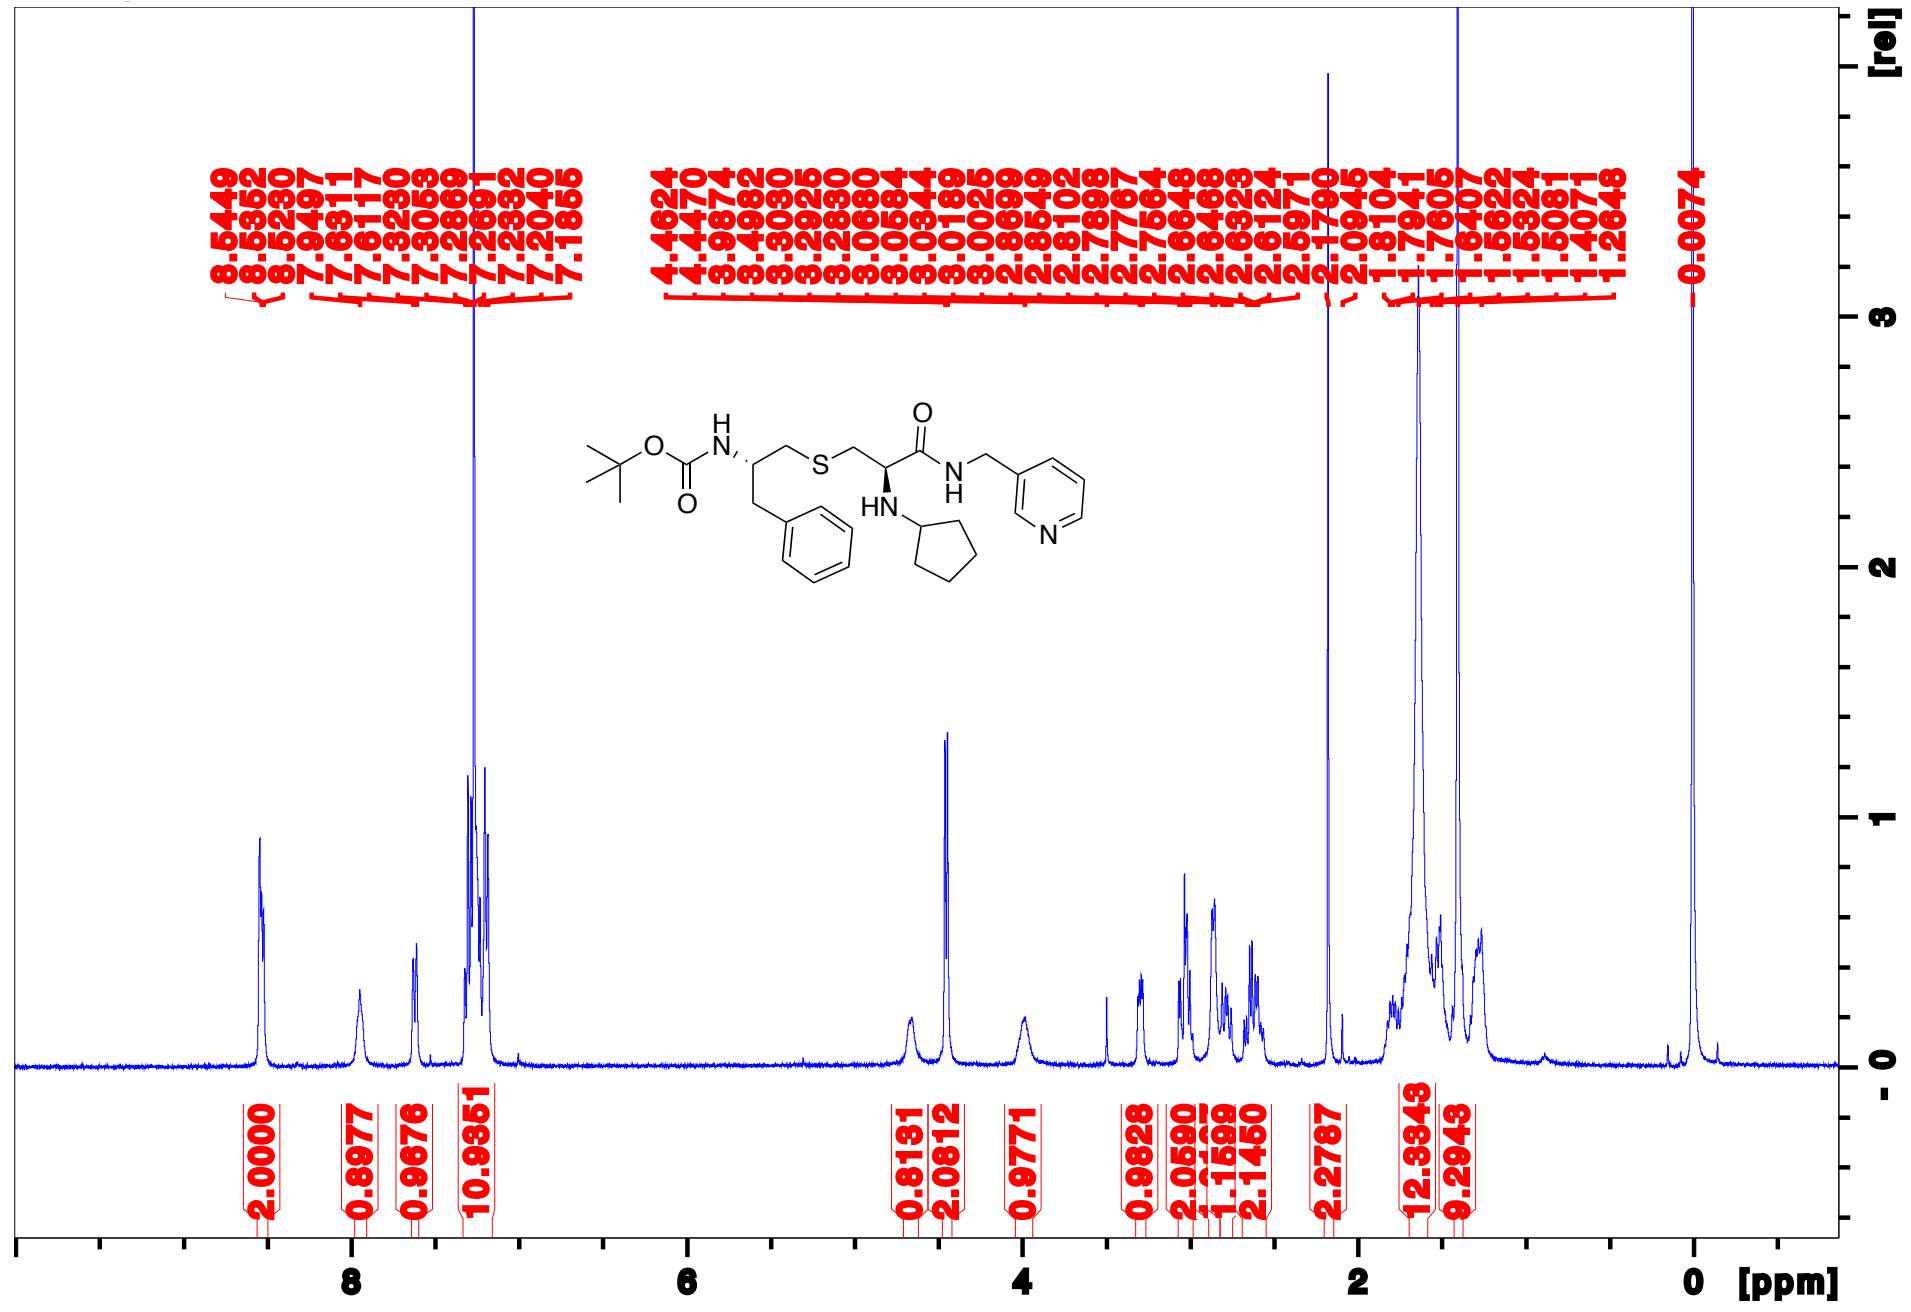

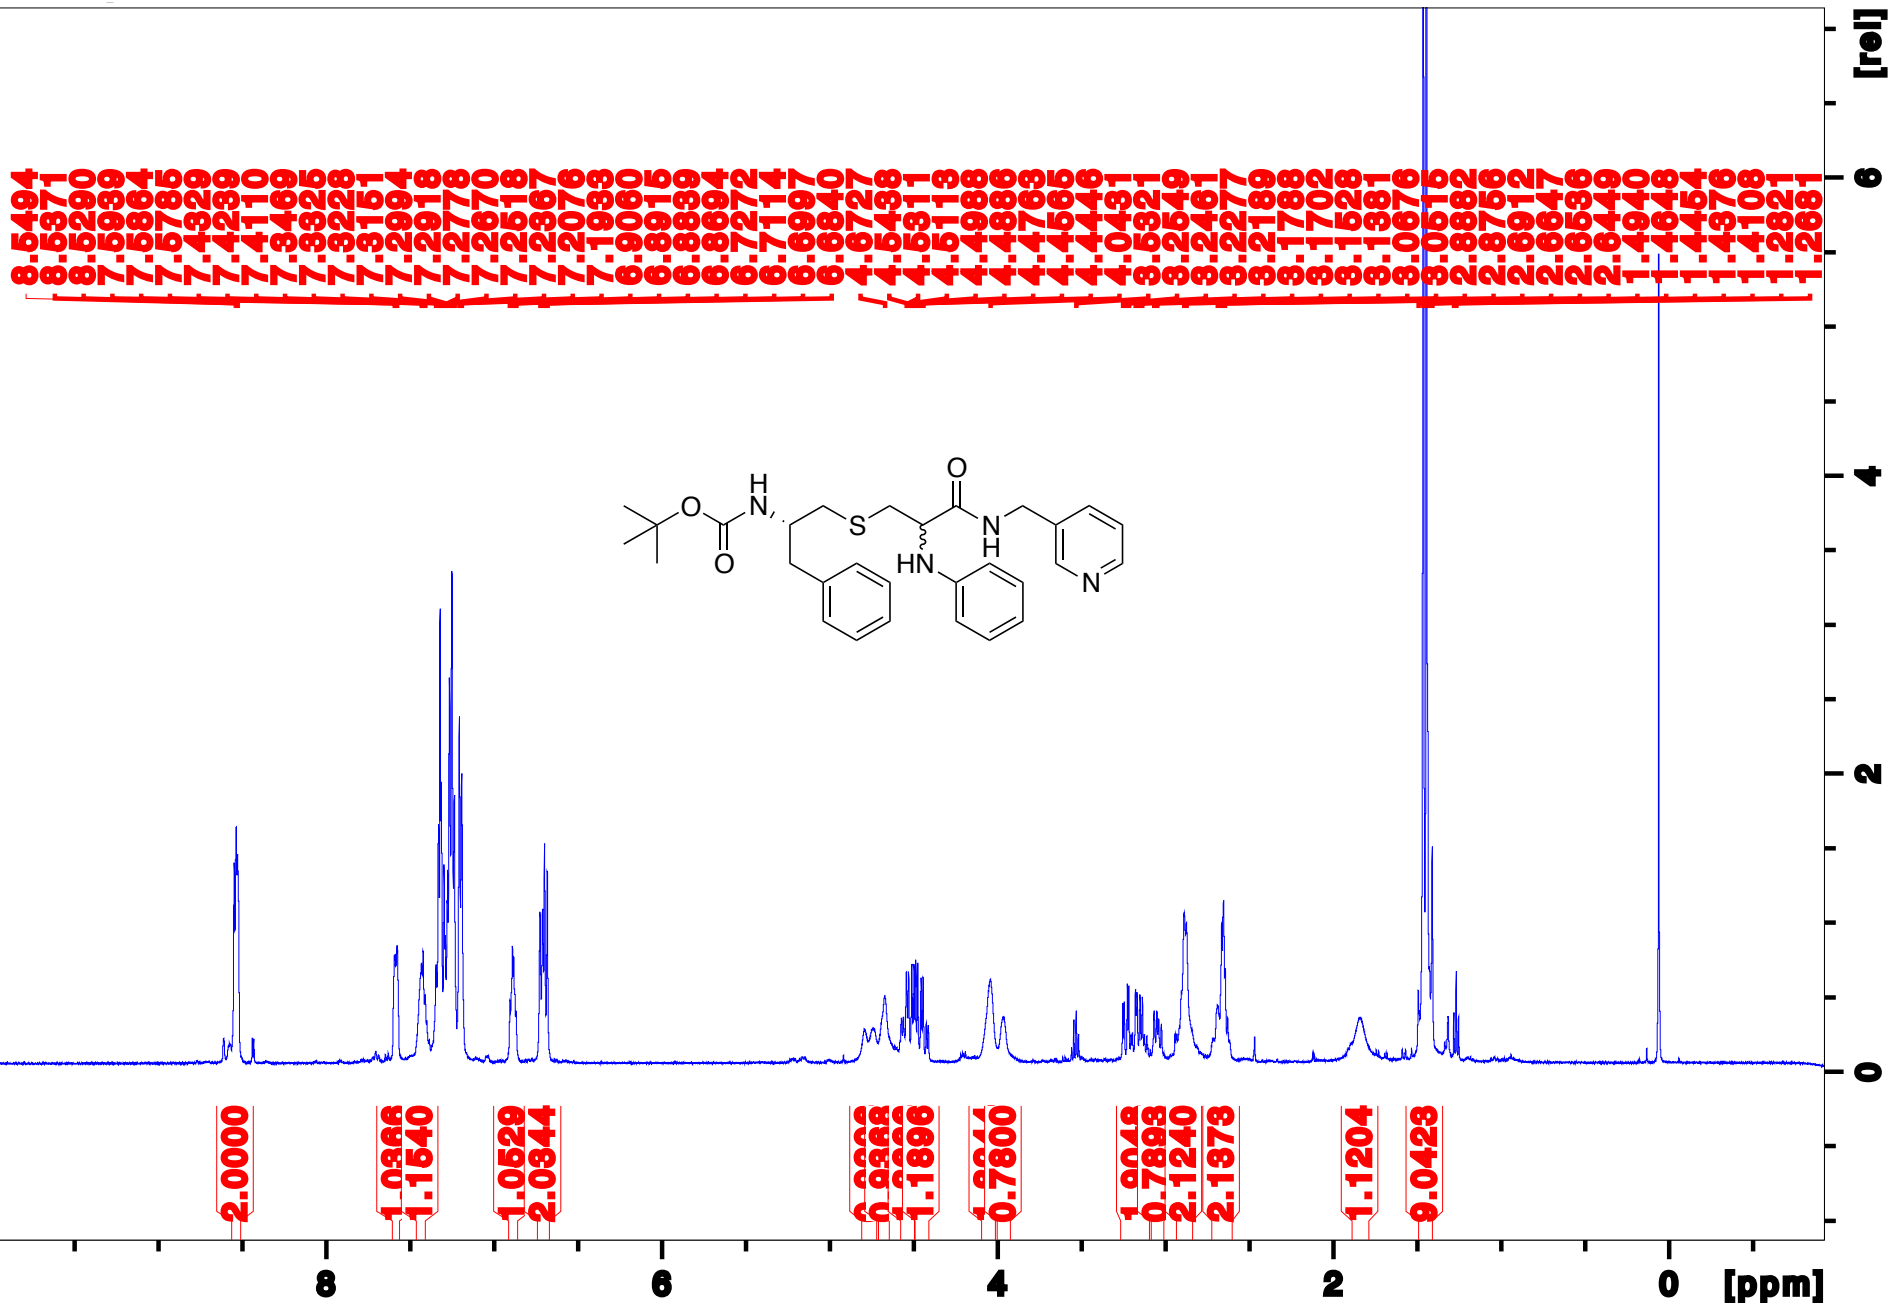

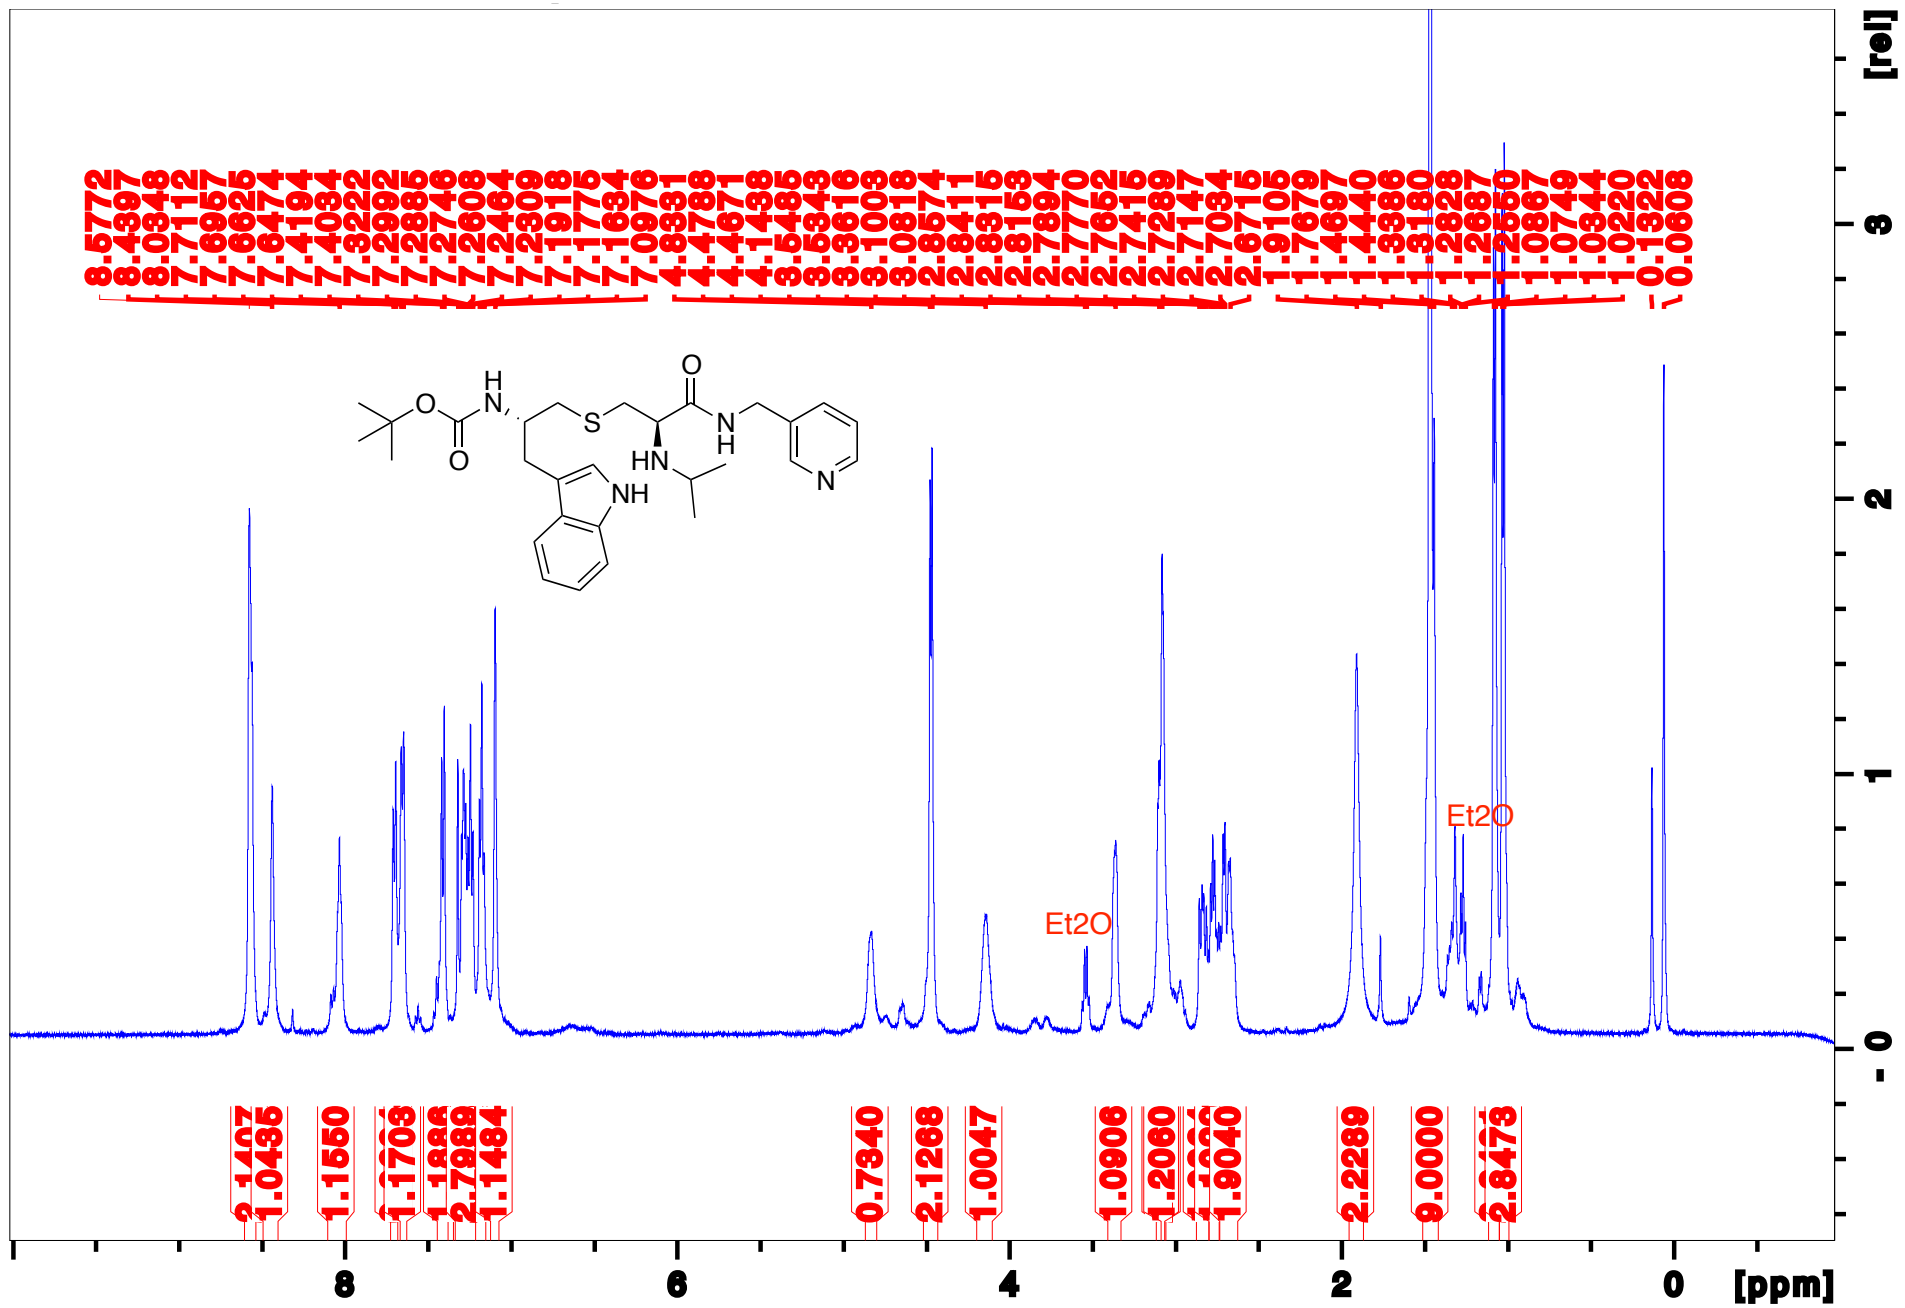

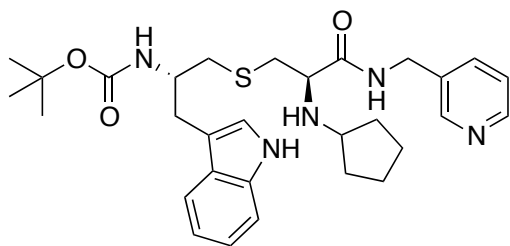

8.5772  
8.4997  
8.0948  
8.77112  
7.6957  
7.6626  
7.6474  
7.4194  
7.4084  
7.3222  
7.2892  
7.2886  
7.2746  
7.2608  
7.2464  
7.2309  
7.1918  
7.1776  
7.1634  
7.0976  
4.8331  
4.4788  
4.4671  
4.1438  
3.5343  
3.3616  
3.1008  
3.0818  
2.8574  
2.8411  
2.8316  
2.8163  
2.7894  
2.7770  
2.7652  
2.7416  
2.7289  
2.7147  
2.7094  
2.6716  
2.9106  
1.7697  
1.4697  
1.4440  
1.3386  
1.3180  
1.2828  
1.2687  
1.2550  
1.0867  
1.0749  
1.0344  
1.0220  
0.1922  
0.0608

2.0100  
2.0000  
0.8184  
2.0409  
0.9997  
1.6617  
0.9455

0.7226  
1.8896  
0.9093

Et2O

1.0161  
3.2792  
0.9164  
1.6776

1.9996  
4.3020  
3.6617  
3.8941  
2.2930

Et2O

8

6

4

2

0 [ppm]

6

4

2

0

[rel]

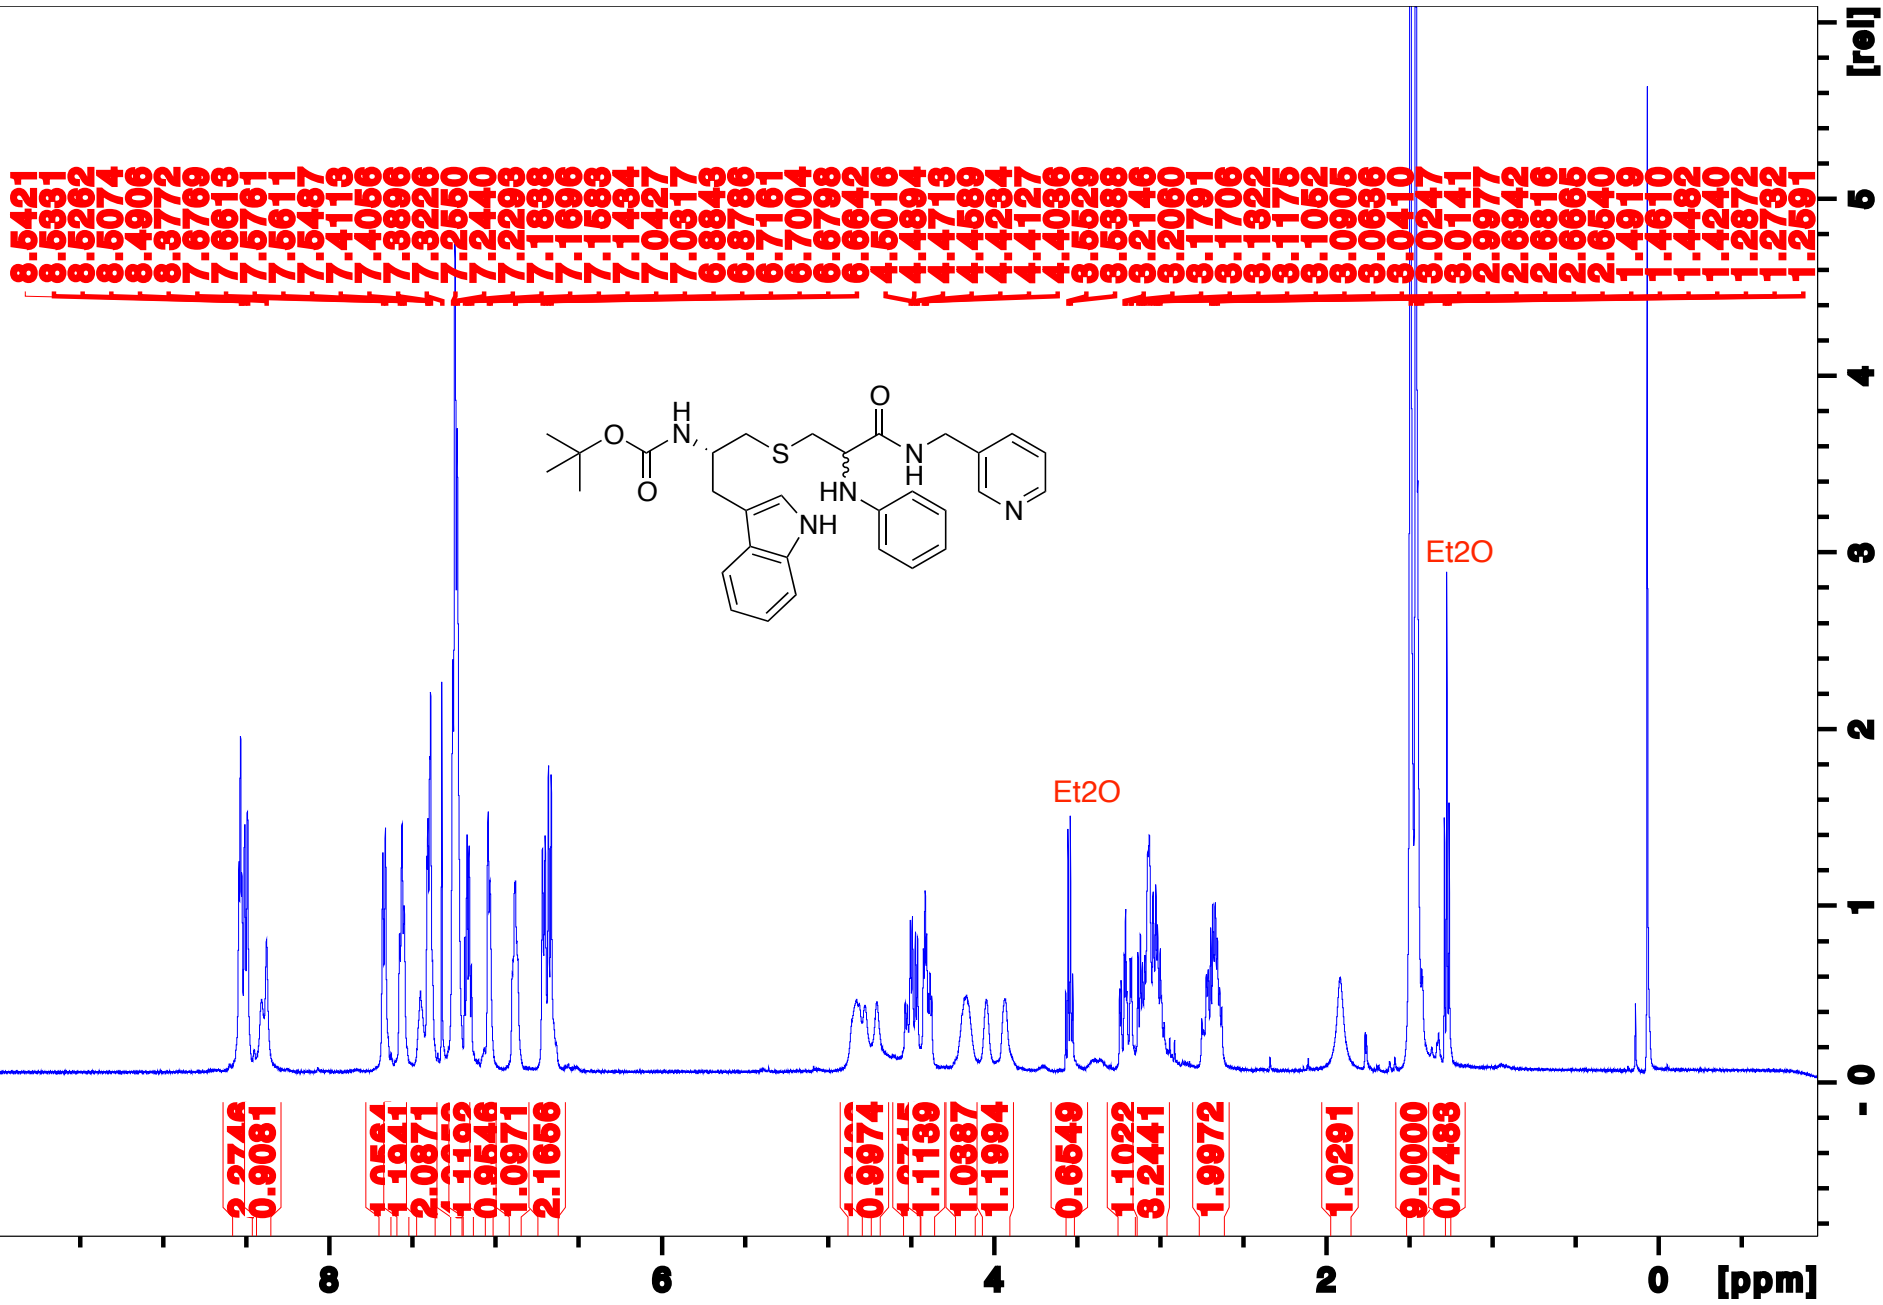

Supplement: NIHMS949957-supplement-supplement.pdf [file NIHMS949957-supplement-supplement.pdf]
